# Supplementary material for: The order of macrophage 4D genome coordinates gene transcription during differentiation and infection
Source: Research Square preprint supplement (doi:10.21203/rs.3.rs-881693/v1), 2021-10-29
Supplement: Supplementary file 4 [file a238ee4f11327d35d930a2b0.xlsx]

## Sheet: The whole collected SNP
Table1. significant SNP collected from GWAS
chr1	10759180	rs77678229	C	G
chr1	10759597	rs118123289	T	C
chr1	11967356	rs4846078	C	T
chr1	11969994	rs4993566	T	G
chr1	12042755	rs4240897	G	A
chr1	39218513	rs581742	C	T
chr1	39219090	rs594797	T	C
chr1	62064751	rs7551210	G	T
chr1	67034789	rs10889630	C	T
chr1	67041309	rs6699200	T	C
chr1	67048743	rs4147266	T	G
chr1	67597119	rs3762318	G	A
chr1	67680275	rs113084917	T	G
chr1	198451030	rs188045344	T	C
chr1	206897727	rs6540574	G	A
chr1	212873431	rs2221593	C	T
chr1	213863315	rs11120194	T	C
chr1	221609549	rs1031674	A	G
chr1	221611211	rs35826842	A	C
chr1	221611496	rs12029151	T	G
chr1	228703289	rs1925714	A	G
chr1	242874885	rs6676375	T	C
chr2	5253598	rs1075309	C	T
chr2	61772257	rs6545883	A	G
chr2	103054449	rs2058660	G	A
chr2	112811013	rs77088208	C	T
chr2	143853970	rs354679	T	C
chr2	143882594	rs4662313	G	A
chr2	143882605	rs11889348	A	C
chr2	143883855	rs354702	A	T
chr2	143883952	rs354703	T	C
chr2	143884871	rs354704	C	T
chr2	143886180	rs354705	T	A
chr2	143886216	rs354706	C	T
chr2	143886437	rs354707	T	A
chr2	143886535	rs354708	A	T
chr2	143886953	rs354709	T	C
chr2	143887084	rs354710	C	T
chr2	143887163	rs354711	T	C
chr2	143888823	rs354712	C	A
chr2	143889098	rs189560	C	T
chr2	143889126	rs181371	C	T
chr2	143889304	rs354713	C	T
chr2	143889749	rs354714	A	T
chr2	143890615	rs354715	G	A
chr2	143891026	rs189816	G	A
chr2	143891450	rs354717	A	G
chr2	194475270	rs1020941	C	G
chr2	205864832	rs2335704	C	A
chr2	228812298	rs1524028	A	C
chr2	228812441	rs2396517	A	T
chr2	232058493	rs2368563	A	G
chr2	232060366	rs62197320	T	G
chr2	232060843	rs60664562	T	A
chr2	232061520	rs62197322	A	G
chr2	232153195	rs77340623	C	T
chr2	232162593	rs17625552	C	T
chr2	232163580	rs80126985	G	C
chr2	232164170	rs78705326	A	G
chr2	232164726	rs17625564	A	G
chr2	232165063	rs17625570	C	T
chr2	232165622	rs17586989	G	A
chr2	232178784	rs75149389	T	C
chr3	10209350	rs112582329	C	T
chr3	12313846	rs6807915	T	C
chr3	26543420	rs2202157	C	T
chr3	31524928	rs114652744	G	A
chr3	54882257	rs143213609	C	A
chr3	107413864	rs201441003	T	A
chr3	151160595	rs6793154	T	C
chr4	3429856	rs2269497	A	G
chr4	5979474	rs35219078	A	G
chr4	5981151	rs11932461	C	G
chr4	5982135	rs6838551	G	T
chr4	5983197	rs6847117	C	T
chr4	21526872	rs13134068	A	G
chr4	31744052	rs1157893	G	A
chr4	31744915	rs10002958	A	G
chr4	31746534	rs10029176	C	T
chr4	31748513	rs10013204	A	G
chr4	31749580	rs28533379	T	C
chr4	37596517	rs2380743	G	A
chr4	37599753	rs2939731	A	G
chr4	37600599	rs2940989	G	A
chr4	37601752	rs2940991	C	T
chr4	37609966	rs2939734	T	G
chr4	37615611	rs17423188	G	A
chr4	58225067	rs4242010	G	A
chr4	58254570	rs150117779	A	G
chr4	58254701	rs138358559	A	G
chr4	78605369	rs958617	A	G
chr4	105844273	rs10005603	T	G
chr4	190712308	rs2739538	G	C
chr5	6900466	rs2894967	G	A
chr5	25322034	rs931924	C	T
chr5	25323707	rs11958933	G	A
chr5	31541142	rs17410035	G	T
chr5	60923475	rs36091	G	A
chr5	60925938	rs42880	G	A
chr5	61055557	rs1501847	T	C
chr5	88166061	rs10064180	G	A
chr5	88177599	rs77381797	T	C
chr5	112563944	rs557438	G	A
chr5	125023190	rs11960504	C	T
chr5	148365234	rs930205	T	C
chr5	158550448	rs118066688	C	G
chr5	158706713	rs13153734	C	T
chr5	158710998	rs35046837	G	A
chr5	158717068	rs13161132	A	C
chr5	158717994	rs62378747	C	T
chr5	158723293	rs1529710	C	T
chr5	158724949	rs2116820	C	T
chr5	158728642	rs62378748	T	C
chr5	158740530	rs3181226	C	G
chr5	158740623	rs3181225	G	A
chr5	158743403	rs2853697	T	G
chr5	171496041	rs55938546	C	A
chr6	2355675	rs2505675	C	T
chr6	32209943	rs75057504	T	C
chr6	32486402	rs41553512	C	T
chr6	32595072	rs112513571	G	A
chr6	32595466	rs111540375	C	T
chr6	32595674	rs111547049	C	T
chr6	32598403	rs114472823	G	C
chr6	32602631	rs17205212	G	A
chr6	32604700	rs111678276	G	T
chr6	32604713	rs188980822	A	T
chr6	32606274	rs113219465	C	T
chr6	32607019	rs28802989	C	G
chr6	32608762	rs80154958	T	C
chr6	32610310	rs113551974	C	T
chr6	32610401	rs9272785	G	A
chr6	32611624	rs73409538	G	T
chr6	32626574	rs28539606	A	G
chr6	32628057	rs200217035	C	T
chr6	32628058	rs201735626	A	T
chr6	32629931	rs41542812	C	G
chr6	45886740	rs12665031	C	T
chr6	45887270	rs3777548	G	A
chr6	45887319	rs1361215	C	T
chr6	45887421	rs1416167	A	T
chr6	45887576	rs9369590	T	C
chr6	45887643	rs3822876	G	T
chr6	45887903	rs3822878	G	A
chr6	45887922	rs3822879	A	T
chr6	45887939	rs3822880	C	T
chr6	45888022	rs3822881	A	T
chr6	45888073	rs3729618	A	G
chr6	45888246	rs3777552	A	G
chr6	45888305	rs3777553	C	A
chr6	45888807	rs3798258	T	C
chr6	45888908	rs3798259	G	T
chr6	45888980	rs3777554	T	C
chr6	45889375	rs6904888	A	G
chr6	45889793	rs12204991	A	T
chr6	45890355	rs9381410	T	C
chr6	45890641	rs3777556	T	C
chr6	45890769	rs3777557	T	C
chr6	45891299	rs3777558	T	C
chr6	45892154	rs3777559	G	A
chr6	45892487	rs9367229	T	C
chr6	45892552	rs9381411	T	A
chr6	45892619	rs9349336	G	A
chr6	45892646	rs9395134	G	A
chr6	45892951	rs10807328	G	A
chr6	45893031	rs6939554	C	T
chr6	45893339	rs6940409	G	A
chr6	52463455	rs111415789	A	G
chr6	65395383	rs142191463	A	G
chr6	144268001	rs144526335	G	A
chr6	144268070	rs117255767	G	A
chr6	146871198	rs78620166	G	A
chr6	147701133	rs9373523	T	G
chr6	154667188	rs2499644	A	G
chr6	154667851	rs2499643	A	G
chr6	154667890	rs2499642	A	G
chr6	154667956	rs2499641	T	C
chr6	154668463	rs2499640	G	A
chr6	154669255	rs2499639	G	A
chr6	154669467	rs2499638	T	G
chr6	154669904	rs2499637	G	A
chr6	154670009	rs2499636	A	G
chr6	154670696	rs2499635	G	A
chr6	154672106	rs2473543	C	T
chr6	154672109	rs2473544	T	C
chr6	165295961	rs9365798	C	T
chr7	7950553	rs189804851	A	T
chr7	11648939	rs2681052	A	C
chr7	15593768	rs916943	C	T
chr7	26695215	rs212837	T	C
chr7	26702506	rs757129	C	G
chr7	26717527	rs212845	C	T
chr7	26726454	rs212854	C	G
chr7	33469241	rs4720118	T	C
chr7	78912471	rs117698752	C	T
chr7	97454980	rs2665441	A	G
chr7	115860783	rs1004107	A	T
chr7	115861660	rs9969224	T	C
chr7	115862296	rs1004109	A	T
chr7	115862902	rs1000966	A	G
chr7	115863446	rs3807968	G	A
chr7	115864889	rs3779509	C	A
chr7	115866354	rs1881287	A	G
chr7	115868798	rs58624059	T	C
chr7	115874466	rs12670683	T	C
chr7	115874560	rs2030978	C	T
chr7	115875359	rs2030977	G	C
chr7	115876365	rs6959237	C	T
chr7	115880277	rs3807975	G	A
chr7	115881159	rs66652906	G	A
chr7	115881458	rs58595078	A	G
chr7	115882323	rs3757730	G	A
chr7	115882599	rs58495099	G	C
chr7	115883453	rs57321537	T	G
chr7	115884319	rs138623810	C	A
chr7	115886079	rs7811984	A	G
chr7	115887001	rs73719150	C	T
chr7	115888162	rs6953050	A	G
chr7	115888339	rs6957561	G	A
chr7	115892650	rs1048508	T	G
chr7	115892738	rs17138472	A	G
chr7	115893407	rs3823977	A	T
chr7	115893647	rs3807980	A	G
chr7	115893845	rs17138483	A	C
chr7	115893897	rs73452247	T	C
chr7	115894376	rs72603593	T	C
chr7	115894403	rs17138486	C	G
chr7	115894589	rs112016811	A	T
chr7	115895010	rs4730719	G	T
chr7	115895235	rs4730720	T	C
chr7	115895433	rs6948556	T	C
chr7	115895718	rs6966770	A	G
chr7	115895995	rs369860875	G	A
chr7	115896049	rs6967695	G	A
chr7	115896716	rs3807981	G	A
chr7	115897096	rs2402057	T	C
chr7	115897222	rs2402058	A	G
chr7	115897242	rs2402059	T	G
chr7	115897871	rs2896180	A	G
chr7	115897884	rs2896181	C	T
chr7	115898177	rs3173919	G	C
chr7	115898442	rs1141470	G	C
chr7	115898885	rs3807982	T	C
chr7	115898991	rs3807983	T	C
chr7	115899335	rs4730721	T	A
chr7	115900262	rs10242959	C	T
chr7	115900353	rs10261531	T	A
chr7	115900394	rs10500059	C	T
chr7	115900686	rs10500060	C	T
chr7	115900724	rs10500061	C	G
chr7	115900820	rs60927526	T	G
chr7	115904052	rs4730723	T	C
chr7	129023597	rs7787531	C	T
chr8	29254686	rs56945296	G	T
chr8	52188213	rs4873534	A	G
chr8	52189472	rs16915954	G	A
chr8	52216762	rs7821565	T	C
chr8	56797257	rs28595219	C	T
chr8	58324397	rs4738594	C	G
chr8	58326012	rs7822640	A	T
chr8	58327021	rs7845847	T	C
chr8	74329796	rs13256021	T	C
chr8	90656988	rs160441	T	C
chr8	105268990	rs7830756	T	C
chr8	106613321	rs17217757	G	C
chr8	118626279	rs10100465	G	A
chr8	131226652	rs1469288	G	A
chr8	131247213	rs1017281	G	A
chr8	131252758	rs10956514	A	G
chr8	131264033	rs12680942	A	G
chr8	131271216	rs2033059	C	T
chr8	131296767	rs4733781	A	C
chr8	131297696	rs17285138	T	A
chr9	19484869	rs7858547	T	C
chr9	22488678	rs586716	G	A
chr9	25262831	rs1662230	T	G
chr9	78223129	rs1854330	A	G
chr9	78229878	rs751303	C	G
chr9	78234845	rs10869606	G	C
chr9	78235702	rs11525994	G	A
chr9	111304511	rs79393974	T	G
chr9	111324602	rs871424	C	T
chr9	111327151	rs17727743	A	C
chr9	111329108	rs7859551	C	G
chr9	111331336	rs12337383	A	C
chr9	116436877	rs3860173	C	T
chr9	117558703	rs6478108	C	T
chr9	117560389	rs186553516	C	T
chr9	132946615	rs10819610	G	T
chr9	140011036	rs4880208	A	G
chr10	14689835	rs10906729	C	T
chr10	31101743	rs1417569	G	A
chr10	60272403	rs149626250	G	T
chr10	61341991	rs1875148	T	C
chr10	64507904	rs58600253	C	T
chr10	81048158	rs942793	T	G
chr10	96792202	rs1934954	T	C
chr10	98988759	rs1468069	A	C
chr10	98989454	rs2297987	A	G
chr10	98993378	rs11189052	A	T
chr10	98998195	rs8181326	G	A
chr10	99001258	rs11189058	G	A
chr10	99001779	rs11595634	A	T
chr10	99132701	rs3818908	A	G
chr10	99134953	rs10786336	A	C
chr10	99134970	rs10882908	T	C
chr10	99135215	rs11189172	T	C
chr10	99135262	rs7084654	G	A
chr10	99135539	rs7088410	G	T
chr10	99136359	rs12359257	A	T
chr10	99137048	rs12258560	T	C
chr10	99137839	rs4635018	G	C
chr10	99137998	rs10882909	G	C
chr10	99138043	rs10882910	G	A
chr10	99138064	rs10882911	A	C
chr10	99138077	rs10882912	C	T
chr10	99139600	rs11189174	C	G
chr10	99139609	rs11189175	T	C
chr10	99140177	rs7074511	G	A
chr10	99140218	rs7092350	T	A
chr10	99140313	rs7092499	T	C
chr10	99140511	rs7078004	A	G
chr10	99140969	rs7096801	T	C
chr10	99141205	rs2275089	A	G
chr10	99141663	rs11189177	C	T
chr10	99141845	rs10882913	C	T
chr10	99142057	rs10882914	A	G
chr10	99142184	rs10882915	A	G
chr10	99142400	rs61863819	T	C
chr10	99142762	rs6584126	G	A
chr10	99142948	rs6584127	A	C
chr10	99143272	rs11189178	T	G
chr10	99143320	rs11189179	T	C
chr10	99143529	rs11189180	A	G
chr10	99144154	rs11189181	A	G
chr10	99144186	rs11189182	A	G
chr10	99144321	rs11189183	A	G
chr10	99144867	rs61861865	C	G
chr10	99145179	rs3818787	T	C
chr10	99145492	rs2297667	T	A
chr10	99146505	rs10882916	T	C
chr10	99146725	rs10882917	T	C
chr10	99147473	rs10786337	A	G
chr10	99147975	rs869967	T	C
chr10	99148151	rs2275090	A	G
chr10	99148796	rs11189191	T	C
chr10	99148944	rs10882918	A	G
chr10	99148968	rs10882919	C	A
chr10	99149008	rs148331122	A	G
chr10	99149009	rs141445387	C	T
chr10	99149012	rs113049384	G	A
chr10	99149403	rs11189192	G	A
chr10	99149627	rs60237341	A	G
chr10	99149750	rs12266723	G	A
chr10	99149914	rs1537645	T	C
chr10	99149922	rs1537646	T	C
chr10	99150794	rs7909345	T	C
chr10	99151108	rs10786338	A	T
chr10	99153076	rs10786339	A	G
chr10	99154016	rs11189195	C	T
chr10	99154782	rs7903562	T	C
chr10	99154982	rs7903847	T	C
chr10	99155079	rs11189196	A	G
chr10	99155125	rs11189197	A	G
chr10	99155327	rs9787426	A	G
chr10	99155561	rs9787454	A	T
chr10	99155685	rs7922512	C	A
chr10	99155984	rs3814553	G	A
chr10	99156273	rs11189200	C	G
chr10	99156563	rs10786340	G	C
chr10	99156994	rs7896100	C	T
chr10	99157573	rs7916665	T	G
chr10	99157575	rs7900255	G	A
chr10	99158537	rs10882922	C	T
chr10	99158607	rs10786341	G	A
chr10	99158907	rs10786342	C	G
chr10	99159018	rs10882923	G	A
chr10	99159096	rs11189203	C	A
chr10	99159304	rs10882924	T	A
chr10	99159482	rs9888116	G	A
chr10	99159634	rs9887991	T	C
chr10	99159869	rs9888026	A	C
chr10	99159963	rs9888117	C	G
chr10	99160046	rs2297668	C	T
chr10	99160152	rs1048442	A	G
chr10	99160690	rs10882926	T	C
chr10	99164394	rs11189204	C	T
chr10	99193728	rs2861952	C	A
chr10	119991669	rs111653077	C	T
chr10	122102422	rs10788068	T	C
chr10	129157591	rs11017542	G	A
chr10	129158220	rs11017547	A	G
chr10	129158237	rs11017548	A	G
chr11	13996155	rs1819084	C	A
chr11	32348789	rs7116974	G	A
chr11	32358589	rs148760906	G	A
chr11	32363616	rs11031728	C	G
chr11	32364187	rs2057178	G	A
chr11	64129722	rs538147	G	A
chr11	64412891	rs11820322	C	T
chr11	102947465	rs7947821	T	C
chr11	102980594	rs12283022	A	G
chr11	103127065	rs12294076	T	C
chr11	103186709	rs313411	A	G
chr11	103188218	rs313410	C	G
chr11	103188438	rs313409	A	G
chr11	103190054	rs220327	A	G
chr11	103195784	rs10791612	C	T
chr11	103198180	rs7948241	G	A
chr11	103198688	rs10895397	A	C
chr11	103200403	rs12577502	C	G
chr11	103201083	rs28638074	C	A
chr11	103202247	rs34915223	A	G
chr11	103203245	rs12271531	C	G
chr11	103203420	rs71480484	T	C
chr11	103205075	rs12799152	G	A
chr11	103207735	rs12806599	G	A
chr11	103212919	rs12800453	T	C
chr11	103220987	rs71480485	G	A
chr12	14377121	rs10772748	C	T
chr12	14397702	rs12424807	T	C
chr12	14401366	rs7487380	G	A
chr12	14404691	rs68027860	A	G
chr12	14409191	rs36108061	C	G
chr12	14412149	rs55901548	A	G
chr12	14413123	rs12425125	C	T
chr12	14414373	rs12422836	G	C
chr12	14414444	rs12426892	A	G
chr12	14414502	rs12425560	C	G
chr12	14414922	rs35996811	G	A
chr12	14415379	rs12423242	G	C
chr12	14416042	rs34737341	C	G
chr12	14416236	rs34246472	G	A
chr12	14419063	rs35883625	A	G
chr12	14419298	rs12831867	C	G
chr12	14419673	rs34991620	C	T
chr12	14419705	rs35747749	T	C
chr12	14421371	rs34152332	T	C
chr12	14421965	rs35429574	G	T
chr12	14422301	rs35849943	A	C
chr12	14423080	rs9919696	A	G
chr12	14423083	rs9919817	C	T
chr12	19017687	rs1490696	C	T
chr12	22600510	rs11046434	C	T
chr12	22633729	rs73076614	T	C
chr12	22666531	rs11046452	T	C
chr12	22697537	rs11046465	C	A
chr12	22725058	rs11046471	G	A
chr12	22730651	rs11046473	A	G
chr12	22768926	rs11046497	G	A
chr12	22772710	rs73080457	A	G
chr12	40552417	rs1873613	T	C
chr12	40601940	rs11175593	C	T
chr12	50223579	rs4898532	T	C
chr12	52544155	rs11613959	A	G
chr12	52544163	rs79397834	T	C
chr12	52544165	rs74535216	C	A
chr12	52544166	rs74383437	T	G
chr12	52546655	rs200495162	G	A
chr12	52550466	rs74539234	C	T
chr12	69261759	rs74099453	T	G
chr12	69263979	rs2291693	A	G
chr12	69264506	rs58899020	C	T
chr12	69265278	rs2293637	C	G
chr12	69266089	rs11830962	T	G
chr12	69266178	rs11837874	G	A
chr12	69266180	rs11837875	G	T
chr12	69266192	rs11837841	C	T
chr12	69266221	rs1144952	T	C
chr12	69266222	rs11837900	G	T
chr12	69266324	rs11837881	C	T
chr12	69266407	rs11831045	T	C
chr12	69266728	rs4631967	A	T
chr12	69266760	rs4359283	G	T
chr12	69267106	rs4460888	A	G
chr12	69267110	rs4506728	C	T
chr12	69268170	rs111880665	T	C
chr12	69268928	rs111843593	G	C
chr12	69269055	rs111344384	T	C
chr12	69269080	rs112871145	G	A
chr12	69269110	rs111847104	A	G
chr12	69270041	rs61642036	C	A
chr12	69271283	rs1629426	C	A
chr12	69271445	rs1795475	T	G
chr12	69271651	rs1795476	C	T
chr12	69273037	rs1663580	C	A
chr12	69274484	rs74099458	C	G
chr12	69274555	rs57202226	C	T
chr12	77738005	rs6538140	G	A
chr12	96945263	rs199911028	A	G
chr12	130507982	rs2454744	C	T
chr12	130508814	rs1353905	G	A
chr12	130510336	rs586151	G	C
chr13	28372798	rs12867751	T	C
chr13	28603395	rs60601341	G	C
chr13	42505674	rs1900442	T	C
chr13	44397815	rs9533634	T	C
chr13	44457925	rs3764147	A	G
chr13	44460369	rs189332232	C	T
chr13	47390843	rs7334858	A	C
chr13	47391953	rs7983914	T	G
chr13	47392923	rs9595535	G	A
chr13	47397810	rs7324274	T	C
chr13	47478865	rs73175542	G	A
chr13	76446482	rs1323565	A	G
chr13	76447196	rs9544058	T	C
chr13	76451240	rs1323566	A	G
chr14	22002461	rs8016621	G	A
chr14	37405638	rs7159402	C	T
chr14	37405908	rs12896722	G	T
chr14	37408081	rs1367031	T	C
chr14	37408766	rs10149290	A	T
chr14	37409598	rs12878657	G	A
chr14	37418720	rs7143097	T	G
chr14	37421196	rs2022722	T	C
chr14	37422028	rs8017518	T	C
chr14	47631416	rs11850238	G	A
chr14	47633289	rs74854657	G	C
chr14	47636853	rs77626777	A	C
chr14	47637606	rs12435081	A	G
chr14	47638053	rs12435755	A	C
chr14	47638293	rs12435901	G	A
chr14	47645579	rs150636023	C	A
chr14	47647284	rs74895326	T	C
chr14	55241049	rs9323270	C	A
chr14	55241645	rs9323271	C	G
chr14	68047143	rs77432698	A	G
chr14	70502050	rs17175227	G	A
chr14	73280418	rs7152005	C	T
chr14	76983730	rs12437118	G	A
chr14	90858484	rs7150626	C	T
chr14	96026450	rs11624680	G	A
chr14	96027153	rs8005962	C	T
chr14	96029214	rs2887395	G	A
chr14	96029588	rs2369019	G	A
chr14	96030442	rs7152619	T	C
chr14	96030763	rs8014367	C	T
chr14	96031957	rs9323929	C	T
chr14	101679255	rs6575836	G	A
chr15	75070518	rs77979355	G	A
chr15	101749385	rs114416857	G	A
chr15	101999651	rs142644068	T	C
chr16	220340	rs116282608	T	G
chr16	3509056	rs40363	G	A
chr16	19622100	rs17326812	A	T
chr16	19623511	rs150404587	G	A
chr16	19624341	rs75199663	G	A
chr16	19625338	rs8056025	G	C
chr16	19626664	rs16972263	A	G
chr16	50854418	rs16948876	G	A
chr16	56988044	rs173539	C	T
chr16	56993324	rs3764261	C	A
chr16	57452165	rs188872	A	G
chr16	75991446	rs1948632	G	A
chr16	82817591	rs12386026	C	T
chr16	86420094	rs1687658	T	C
chr16	86422112	rs1728407	A	G
chr17	35748867	rs8082190	C	T
chr17	35850553	rs712039	C	T
chr17	54561492	rs1867164	A	G
chr17	54563063	rs9901739	C	A
chr17	54948950	rs9906165	A	G
chr17	54949047	rs9906601	C	T
chr17	59422203	rs75741931	C	T
chr17	59424604	rs143968095	G	A
chr17	59427643	rs75073226	G	A
chr17	59427829	rs116271272	G	A
chr18	5451523	rs144095996	C	T
chr18	20154558	rs35687920	G	A
chr18	20190795	rs4331426	G	A
chr18	46011140	rs8087640	T	G
chr18	55831697	rs486117	G	A
chr18	58109190	rs4257308	C	T
chr18	67599516	rs3937015	T	C
chr18	67605807	rs12970649	C	T
chr19	44932972	rs1434579	C	T
chr20	2379598	rs6114027	T	C
chr20	13786587	rs6079180	A	G
chr20	20236581	rs6046764	C	T
chr20	46377454	rs1999546	G	A
chr21	16213169	rs2150367	G	T
chr21	16235675	rs12482329	T	C
chr21	34304733	rs11701827	G	A
chr21	34306602	rs73198439	C	T
chr21	34308169	rs73198441	A	G
chr21	34308212	rs73198442	A	C
chr21	34308743	rs11702172	G	A
chr21	34319543	rs2105476	G	C
chr21	34320511	rs8128655	T	G
chr21	34321686	rs2834026	C	T
chr21	42002476	rs11702781	C	T
chr21	42216955	rs2837857	C	T
chr21	43343510	rs451390	G	C
chr21	45615023	rs2838519	G	A
chr22	37544486	rs3218255	G	A
chr22	47149021	rs738727	G	A
chrX	33784063	rs5928363	A	T
chrX	47906480	rs142513793	C	T
chrX	142842119	rs139956886	C	T

## Sheet: collected SNP with loop
Table2. Whole significant SNP overlapped with Hi-C loop
chr1	rs77678229	C	G	chr1	10750000	10755000	chr1	10570000	10575000
chr1	rs77678229	C	G	chr1	10750000	10760000	chr1	10570000	10580000
chr1	rs118123289	T	C	chr1	10750000	10755000	chr1	10570000	10575000
chr1	rs118123289	T	C	chr1	10750000	10760000	chr1	10570000	10580000
chr1	rs4846078	C	T	chr1	11960000	11970000	chr1	11710000	11720000
chr1	rs4846078	C	T	chr1	11960000	11970000	chr1	11900000	11910000
chr1	rs4846078	C	T	chr1	11960000	11970000	chr1	12020000	12030000
chr1	rs4993566	T	G	chr1	11960000	11970000	chr1	11710000	11720000
chr1	rs4993566	T	G	chr1	11960000	11970000	chr1	11900000	11910000
chr1	rs4993566	T	G	chr1	11960000	11970000	chr1	12020000	12030000
chr1	rs7551210	G	T	chr1	62050000	62075000	chr1	61500000	61525000
chr1	rs10889630	C	T	chr1	67025000	67050000	chr1	67175000	67200000
chr1	rs6699200	T	C	chr1	67025000	67050000	chr1	67175000	67200000
chr1	rs4147266	T	G	chr1	67025000	67050000	chr1	67175000	67200000
chr1	rs3762318	G	A	chr1	67600000	67610000	chr1	67230000	67240000
chr1	rs3762318	G	A	chr1	67600000	67610000	chr1	67460000	67470000
chr1	rs113084917	T	G	chr1	67670000	67680000	chr1	67460000	67470000
chr1	rs113084917	T	G	chr1	67675000	67680000	chr1	67230000	67235000
chr1	rs113084917	T	G	chr1	67680000	67690000	chr1	67960000	67970000
chr1	rs188045344	T	C	chr1	198425000	198450000	chr1	197475000	197500000
chr1	rs188045344	T	C	chr1	198425000	198450000	chr1	197575000	197600000
chr1	rs188045344	T	C	chr1	198425000	198450000	chr1	197875000	197900000
chr1	rs2221593	C	T	chr1	212870000	212880000	chr1	212950000	212960000
chr1	rs1031674	A	G	chr1	221610000	221615000	chr1	221270000	221275000
chr1	rs1031674	A	G	chr1	221610000	221620000	chr1	221890000	221900000
chr1	rs1031674	A	G	chr1	221610000	221620000	chr1	222160000	222170000
chr1	rs1031674	A	G	chr1	221600000	221610000	chr1	221270000	221280000
chr1	rs1031674	A	G	chr1	221600000	221610000	chr1	221370000	221380000
chr1	rs1031674	A	G	chr1	221600000	221610000	chr1	221440000	221450000
chr1	rs1031674	A	G	chr1	221605000	221610000	chr1	220985000	220990000
chr1	rs1031674	A	G	chr1	221605000	221610000	chr1	221040000	221045000
chr1	rs1031674	A	G	chr1	221605000	221610000	chr1	221045000	221050000
chr1	rs1031674	A	G	chr1	221605000	221610000	chr1	221375000	221380000
chr1	rs1031674	A	G	chr1	221605000	221610000	chr1	221435000	221440000
chr1	rs1031674	A	G	chr1	221605000	221610000	chr1	222625000	222630000
chr1	rs35826842	A	C	chr1	221610000	221615000	chr1	221270000	221275000
chr1	rs35826842	A	C	chr1	221610000	221620000	chr1	221890000	221900000
chr1	rs35826842	A	C	chr1	221610000	221620000	chr1	222160000	222170000
chr1	rs35826842	A	C	chr1	221600000	221610000	chr1	221270000	221280000
chr1	rs35826842	A	C	chr1	221600000	221610000	chr1	221370000	221380000
chr1	rs35826842	A	C	chr1	221600000	221610000	chr1	221440000	221450000
chr1	rs35826842	A	C	chr1	221605000	221610000	chr1	220985000	220990000
chr1	rs35826842	A	C	chr1	221605000	221610000	chr1	221040000	221045000
chr1	rs35826842	A	C	chr1	221605000	221610000	chr1	221045000	221050000
chr1	rs35826842	A	C	chr1	221605000	221610000	chr1	221375000	221380000
chr1	rs35826842	A	C	chr1	221605000	221610000	chr1	221435000	221440000
chr1	rs35826842	A	C	chr1	221605000	221610000	chr1	222625000	222630000
chr1	rs12029151	T	G	chr1	221610000	221615000	chr1	221270000	221275000
chr1	rs12029151	T	G	chr1	221610000	221620000	chr1	221890000	221900000
chr1	rs12029151	T	G	chr1	221610000	221620000	chr1	222160000	222170000
chr1	rs12029151	T	G	chr1	221600000	221610000	chr1	221270000	221280000
chr1	rs12029151	T	G	chr1	221600000	221610000	chr1	221370000	221380000
chr1	rs12029151	T	G	chr1	221600000	221610000	chr1	221440000	221450000
chr1	rs12029151	T	G	chr1	221605000	221610000	chr1	220985000	220990000
chr1	rs12029151	T	G	chr1	221605000	221610000	chr1	221040000	221045000
chr1	rs12029151	T	G	chr1	221605000	221610000	chr1	221045000	221050000
chr1	rs12029151	T	G	chr1	221605000	221610000	chr1	221375000	221380000
chr1	rs12029151	T	G	chr1	221605000	221610000	chr1	221435000	221440000
chr1	rs12029151	T	G	chr1	221605000	221610000	chr1	222625000	222630000
chr2	rs6545883	A	G	chr2	61760000	61770000	chr2	61880000	61890000
chr2	rs2058660	G	A	chr2	103050000	103075000	chr2	101950000	101975000
chr2	rs2058660	G	A	chr2	103050000	103075000	chr2	102500000	102525000
chr2	rs2058660	G	A	chr2	103050000	103060000	chr2	102630000	102640000
chr2	rs2058660	G	A	chr2	103050000	103060000	chr2	102640000	102650000
chr2	rs2058660	G	A	chr2	103050000	103060000	chr2	102970000	102980000
chr2	rs2058660	G	A	chr2	103055000	103060000	chr2	102630000	102635000
chr2	rs2058660	G	A	chr2	103055000	103060000	chr2	102870000	102875000
chr2	rs2058660	G	A	chr2	103055000	103060000	chr2	102975000	102980000
chr2	rs77088208	C	T	chr2	112805000	112810000	chr2	112645000	112650000
chr2	rs354679	T	C	chr2	143850000	143875000	chr2	144175000	144200000
chr2	rs4662313	G	A	chr2	143875000	143900000	chr2	145250000	145275000
chr2	rs4662313	G	A	chr2	143875000	143900000	chr2	145450000	145475000
chr2	rs11889348	A	C	chr2	143875000	143900000	chr2	145250000	145275000
chr2	rs11889348	A	C	chr2	143875000	143900000	chr2	145450000	145475000
chr2	rs354702	A	T	chr2	143875000	143900000	chr2	145250000	145275000
chr2	rs354702	A	T	chr2	143875000	143900000	chr2	145450000	145475000
chr2	rs354703	T	C	chr2	143875000	143900000	chr2	145250000	145275000
chr2	rs354703	T	C	chr2	143875000	143900000	chr2	145450000	145475000
chr2	rs354704	C	T	chr2	143875000	143900000	chr2	145250000	145275000
chr2	rs354704	C	T	chr2	143875000	143900000	chr2	145450000	145475000
chr2	rs354705	T	A	chr2	143875000	143900000	chr2	145250000	145275000
chr2	rs354705	T	A	chr2	143875000	143900000	chr2	145450000	145475000
chr2	rs354706	C	T	chr2	143875000	143900000	chr2	145250000	145275000
chr2	rs354706	C	T	chr2	143875000	143900000	chr2	145450000	145475000
chr2	rs354707	T	A	chr2	143875000	143900000	chr2	145250000	145275000
chr2	rs354707	T	A	chr2	143875000	143900000	chr2	145450000	145475000
chr2	rs354708	A	T	chr2	143875000	143900000	chr2	145250000	145275000
chr2	rs354708	A	T	chr2	143875000	143900000	chr2	145450000	145475000
chr2	rs354709	T	C	chr2	143875000	143900000	chr2	145250000	145275000
chr2	rs354709	T	C	chr2	143875000	143900000	chr2	145450000	145475000
chr2	rs354710	C	T	chr2	143875000	143900000	chr2	145250000	145275000
chr2	rs354710	C	T	chr2	143875000	143900000	chr2	145450000	145475000
chr2	rs354711	T	C	chr2	143875000	143900000	chr2	145250000	145275000
chr2	rs354711	T	C	chr2	143875000	143900000	chr2	145450000	145475000
chr2	rs354712	C	A	chr2	143875000	143900000	chr2	145250000	145275000
chr2	rs354712	C	A	chr2	143875000	143900000	chr2	145450000	145475000
chr2	rs189560	C	T	chr2	143875000	143900000	chr2	145250000	145275000
chr2	rs189560	C	T	chr2	143875000	143900000	chr2	145450000	145475000
chr2	rs181371	C	T	chr2	143875000	143900000	chr2	145250000	145275000
chr2	rs181371	C	T	chr2	143875000	143900000	chr2	145450000	145475000
chr2	rs354713	C	T	chr2	143875000	143900000	chr2	145250000	145275000
chr2	rs354713	C	T	chr2	143875000	143900000	chr2	145450000	145475000
chr2	rs354714	A	T	chr2	143875000	143900000	chr2	145250000	145275000
chr2	rs354714	A	T	chr2	143875000	143900000	chr2	145450000	145475000
chr2	rs354715	G	A	chr2	143875000	143900000	chr2	145250000	145275000
chr2	rs354715	G	A	chr2	143875000	143900000	chr2	145450000	145475000
chr2	rs189816	G	A	chr2	143875000	143900000	chr2	145250000	145275000
chr2	rs189816	G	A	chr2	143875000	143900000	chr2	145450000	145475000
chr2	rs354717	A	G	chr2	143875000	143900000	chr2	145250000	145275000
chr2	rs354717	A	G	chr2	143875000	143900000	chr2	145450000	145475000
chr2	rs1020941	C	G	chr2	194450000	194475000	chr2	192675000	192700000
chr2	rs1020941	C	G	chr2	194450000	194475000	chr2	193050000	193075000
chr2	rs1524028	A	C	chr2	228800000	228810000	chr2	229510000	229520000
chr2	rs2396517	A	T	chr2	228800000	228810000	chr2	229510000	229520000
chr2	rs2368563	A	G	chr2	232055000	232060000	chr2	231970000	231975000
chr2	rs2368563	A	G	chr2	232060000	232065000	chr2	231970000	231975000
chr2	rs2368563	A	G	chr2	232060000	232070000	chr2	231970000	231980000
chr2	rs62197320	T	G	chr2	232055000	232060000	chr2	231970000	231975000
chr2	rs62197320	T	G	chr2	232060000	232065000	chr2	231970000	231975000
chr2	rs62197320	T	G	chr2	232060000	232070000	chr2	231970000	231980000
chr2	rs60664562	T	A	chr2	232055000	232060000	chr2	231970000	231975000
chr2	rs60664562	T	A	chr2	232060000	232065000	chr2	231970000	231975000
chr2	rs60664562	T	A	chr2	232060000	232070000	chr2	231970000	231980000
chr2	rs62197322	A	G	chr2	232055000	232060000	chr2	231970000	231975000
chr2	rs62197322	A	G	chr2	232060000	232065000	chr2	231970000	231975000
chr2	rs62197322	A	G	chr2	232060000	232070000	chr2	231970000	231980000
chr2	rs77340623	C	T	chr2	232150000	232175000	chr2	232250000	232275000
chr2	rs17625552	C	T	chr2	232150000	232175000	chr2	232250000	232275000
chr2	rs17625552	C	T	chr2	232160000	232165000	chr2	232270000	232275000
chr2	rs80126985	G	C	chr2	232150000	232175000	chr2	232250000	232275000
chr2	rs80126985	G	C	chr2	232160000	232165000	chr2	232270000	232275000
chr2	rs78705326	A	G	chr2	232150000	232175000	chr2	232250000	232275000
chr2	rs78705326	A	G	chr2	232160000	232165000	chr2	232270000	232275000
chr2	rs17625564	A	G	chr2	232150000	232175000	chr2	232250000	232275000
chr2	rs17625564	A	G	chr2	232160000	232165000	chr2	232270000	232275000
chr2	rs17625570	C	T	chr2	232150000	232175000	chr2	232250000	232275000
chr2	rs17625570	C	T	chr2	232160000	232165000	chr2	232270000	232275000
chr2	rs17586989	G	A	chr2	232150000	232175000	chr2	232250000	232275000
chr2	rs17586989	G	A	chr2	232160000	232165000	chr2	232270000	232275000
chr2	rs75149389	T	C	chr2	232150000	232175000	chr2	232250000	232275000
chr3	rs112582329	C	T	chr3	10200000	10210000	chr3	10260000	10270000
chr3	rs6807915	T	C	chr3	12315000	12320000	chr3	12225000	12230000
chr3	rs114652744	G	A	chr3	31510000	31520000	chr3	31250000	31260000
chr3	rs114652744	G	A	chr3	31515000	31520000	chr3	31565000	31570000
chr3	rs143213609	C	A	chr3	54875000	54900000	chr3	55200000	55225000
chr3	rs143213609	C	A	chr3	54875000	54900000	chr3	55500000	55525000
chr3	rs143213609	C	A	chr3	54875000	54900000	chr3	55650000	55675000
chr3	rs143213609	C	A	chr3	54875000	54900000	chr3	55750000	55775000
chr3	rs143213609	C	A	chr3	54875000	54900000	chr3	55775000	55800000
chr3	rs143213609	C	A	chr3	54875000	54900000	chr3	55925000	55950000
chr3	rs143213609	C	A	chr3	54875000	54900000	chr3	56075000	56100000
chr3	rs143213609	C	A	chr3	54875000	54900000	chr3	56275000	56300000
chr3	rs143213609	C	A	chr3	54880000	54890000	chr3	56070000	56080000
chr3	rs201441003	T	A	chr3	107400000	107410000	chr3	108190000	108200000
chr3	rs6793154	T	C	chr3	151160000	151170000	chr3	151370000	151380000
chr3	rs6793154	T	C	chr3	151160000	151165000	chr3	151555000	151560000
chr3	rs6793154	T	C	chr3	151150000	151160000	chr3	150940000	150950000
chr3	rs6793154	T	C	chr3	151150000	151175000	chr3	151625000	151650000
chr3	rs6793154	T	C	chr3	151150000	151175000	chr3	152275000	152300000
chr3	rs6793154	T	C	chr3	151155000	151160000	chr3	151555000	151560000
chr3	rs6793154	T	C	chr3	151155000	151160000	chr3	151635000	151640000
chr4	rs2269497	A	G	chr4	3430000	3440000	chr4	3350000	3360000
chr4	rs13134068	A	G	chr4	21500000	21525000	chr4	22375000	22400000
chr4	rs1157893	G	A	chr4	31740000	31750000	chr4	31900000	31910000
chr4	rs10002958	A	G	chr4	31740000	31750000	chr4	31900000	31910000
chr4	rs10029176	C	T	chr4	31740000	31750000	chr4	31900000	31910000
chr4	rs10013204	A	G	chr4	31740000	31750000	chr4	31900000	31910000
chr4	rs28533379	T	C	chr4	31740000	31750000	chr4	31900000	31910000
chr4	rs2380743	G	A	chr4	37600000	37605000	chr4	37800000	37805000
chr4	rs2380743	G	A	chr4	37600000	37625000	chr4	38025000	38050000
chr4	rs2939731	A	G	chr4	37600000	37605000	chr4	37800000	37805000
chr4	rs2939731	A	G	chr4	37600000	37625000	chr4	38025000	38050000
chr4	rs2940989	G	A	chr4	37600000	37605000	chr4	37800000	37805000
chr4	rs2940989	G	A	chr4	37600000	37625000	chr4	38025000	38050000
chr4	rs2940991	C	T	chr4	37600000	37605000	chr4	37800000	37805000
chr4	rs2940991	C	T	chr4	37600000	37625000	chr4	38025000	38050000
chr4	rs2939734	T	G	chr4	37600000	37605000	chr4	37800000	37805000
chr4	rs2939734	T	G	chr4	37600000	37625000	chr4	38025000	38050000
chr4	rs2939734	T	G	chr4	37610000	37620000	chr4	37790000	37800000
chr4	rs17423188	G	A	chr4	37600000	37625000	chr4	38025000	38050000
chr4	rs17423188	G	A	chr4	37610000	37620000	chr4	37790000	37800000
chr4	rs4242010	G	A	chr4	58225000	58250000	chr4	57900000	57925000
chr4	rs150117779	A	G	chr4	58225000	58250000	chr4	57900000	57925000
chr4	rs138358559	A	G	chr4	58225000	58250000	chr4	57900000	57925000
chr4	rs10005603	T	G	chr4	105845000	105850000	chr4	106390000	106395000
chr4	rs10005603	T	G	chr4	105825000	105850000	chr4	106375000	106400000
chr4	rs10005603	T	G	chr4	105840000	105850000	chr4	106390000	106400000
chr4	rs2739538	G	C	chr4	190710000	190715000	chr4	190355000	190360000
chr4	rs2739538	G	C	chr4	190710000	190720000	chr4	190360000	190370000
chr5	rs36091	G	A	chr5	60920000	60930000	chr5	60630000	60640000
chr5	rs42880	G	A	chr5	60920000	60930000	chr5	60630000	60640000
chr5	rs10064180	G	A	chr5	88165000	88170000	chr5	88120000	88125000
chr5	rs10064180	G	A	chr5	88160000	88165000	chr5	88120000	88125000
chr5	rs10064180	G	A	chr5	88170000	88180000	chr5	88590000	88600000
chr5	rs10064180	G	A	chr5	88170000	88180000	chr5	88750000	88760000
chr5	rs10064180	G	A	chr5	88170000	88180000	chr5	89310000	89320000
chr5	rs10064180	G	A	chr5	88170000	88180000	chr5	89560000	89570000
chr5	rs77381797	T	C	chr5	88180000	88190000	chr5	88580000	88590000
chr5	rs77381797	T	C	chr5	88180000	88185000	chr5	88690000	88695000
chr5	rs77381797	T	C	chr5	88170000	88180000	chr5	88590000	88600000
chr5	rs77381797	T	C	chr5	88170000	88180000	chr5	88750000	88760000
chr5	rs77381797	T	C	chr5	88170000	88180000	chr5	89310000	89320000
chr5	rs77381797	T	C	chr5	88170000	88180000	chr5	89560000	89570000
chr5	rs77381797	T	C	chr5	88175000	88180000	chr5	88025000	88030000
chr5	rs77381797	T	C	chr5	88175000	88180000	chr5	88110000	88115000
chr5	rs77381797	T	C	chr5	88175000	88200000	chr5	89550000	89575000
chr5	rs557438	G	A	chr5	112550000	112575000	chr5	137225000	137250000
chr5	rs930205	T	C	chr5	148370000	148380000	chr5	148110000	148120000
chr5	rs118066688	C	G	chr5	158550000	158560000	chr5	157180000	157190000
chr5	rs118066688	C	G	chr5	158550000	158560000	chr5	157240000	157250000
chr5	rs118066688	C	G	chr5	158555000	158560000	chr5	157185000	157190000
chr5	rs118066688	C	G	chr5	158525000	158550000	chr5	157175000	157200000
chr5	rs118066688	C	G	chr5	158525000	158550000	chr5	157800000	157825000
chr5	rs118066688	C	G	chr5	158550000	158575000	chr5	157425000	157450000
chr5	rs13153734	C	T	chr5	158700000	158710000	chr5	158590000	158600000
chr5	rs13153734	C	T	chr5	158700000	158725000	chr5	158575000	158600000
chr5	rs13153734	C	T	chr5	158700000	158725000	chr5	159375000	159400000
chr5	rs13153734	C	T	chr5	158710000	158720000	chr5	159820000	159830000
chr5	rs35046837	G	A	chr5	158700000	158710000	chr5	158590000	158600000
chr5	rs35046837	G	A	chr5	158700000	158725000	chr5	158575000	158600000
chr5	rs35046837	G	A	chr5	158700000	158725000	chr5	159375000	159400000
chr5	rs35046837	G	A	chr5	158710000	158720000	chr5	159820000	159830000
chr5	rs13161132	A	C	chr5	158700000	158725000	chr5	158575000	158600000
chr5	rs13161132	A	C	chr5	158700000	158725000	chr5	159375000	159400000
chr5	rs13161132	A	C	chr5	158710000	158720000	chr5	159820000	159830000
chr5	rs62378747	C	T	chr5	158700000	158725000	chr5	158575000	158600000
chr5	rs62378747	C	T	chr5	158700000	158725000	chr5	159375000	159400000
chr5	rs62378747	C	T	chr5	158710000	158720000	chr5	159820000	159830000
chr5	rs1529710	C	T	chr5	158700000	158725000	chr5	158575000	158600000
chr5	rs1529710	C	T	chr5	158700000	158725000	chr5	159375000	159400000
chr5	rs1529710	C	T	chr5	158710000	158720000	chr5	159820000	159830000
chr5	rs2116820	C	T	chr5	158700000	158725000	chr5	158575000	158600000
chr5	rs2116820	C	T	chr5	158700000	158725000	chr5	159375000	159400000
chr5	rs2116820	C	T	chr5	158710000	158720000	chr5	159820000	159830000
chr5	rs62378748	T	C	chr5	158700000	158725000	chr5	158575000	158600000
chr5	rs62378748	T	C	chr5	158700000	158725000	chr5	159375000	159400000
chr5	rs3181226	C	G	chr5	158745000	158750000	chr5	158580000	158585000
chr5	rs3181226	C	G	chr5	158740000	158745000	chr5	158580000	158585000
chr5	rs3181225	G	A	chr5	158745000	158750000	chr5	158580000	158585000
chr5	rs3181225	G	A	chr5	158740000	158745000	chr5	158580000	158585000
chr5	rs2853697	T	G	chr5	158745000	158750000	chr5	158580000	158585000
chr5	rs2853697	T	G	chr5	158740000	158745000	chr5	158580000	158585000
chr5	rs55938546	C	A	chr5	171475000	171500000	chr5	170825000	170850000
chr6	rs75057504	T	C	chr6	32210000	32220000	chr6	32380000	32390000
chr6	rs75057504	T	C	chr6	32210000	32220000	chr6	32750000	32760000
chr6	rs75057504	T	C	chr6	32210000	32220000	chr6	32760000	32770000
chr6	rs112513571	G	A	chr6	32600000	32625000	chr6	45650000	45675000
chr6	rs111540375	C	T	chr6	32600000	32625000	chr6	45650000	45675000
chr6	rs111547049	C	T	chr6	32600000	32625000	chr6	45650000	45675000
chr6	rs114472823	G	C	chr6	32600000	32625000	chr6	45650000	45675000
chr6	rs17205212	G	A	chr6	32600000	32625000	chr6	45650000	45675000
chr6	rs111678276	G	T	chr6	32600000	32625000	chr6	45650000	45675000
chr6	rs188980822	A	T	chr6	32600000	32625000	chr6	45650000	45675000
chr6	rs113219465	C	T	chr6	32610000	32620000	chr6	45660000	45670000
chr6	rs113219465	C	T	chr6	32600000	32625000	chr6	45650000	45675000
chr6	rs28802989	C	G	chr6	32610000	32620000	chr6	45660000	45670000
chr6	rs28802989	C	G	chr6	32600000	32625000	chr6	45650000	45675000
chr6	rs80154958	T	C	chr6	32610000	32620000	chr6	45660000	45670000
chr6	rs80154958	T	C	chr6	32600000	32625000	chr6	45650000	45675000
chr6	rs113551974	C	T	chr6	32610000	32620000	chr6	45660000	45670000
chr6	rs113551974	C	T	chr6	32600000	32625000	chr6	45650000	45675000
chr6	rs9272785	G	A	chr6	32610000	32620000	chr6	45660000	45670000
chr6	rs9272785	G	A	chr6	32600000	32625000	chr6	45650000	45675000
chr6	rs73409538	G	T	chr6	32610000	32620000	chr6	45660000	45670000
chr6	rs73409538	G	T	chr6	32600000	32625000	chr6	45650000	45675000
chr6	rs28539606	A	G	chr6	32600000	32625000	chr6	45650000	45675000
chr6	rs200217035	C	T	chr6	32600000	32625000	chr6	45650000	45675000
chr6	rs201735626	A	T	chr6	32600000	32625000	chr6	45650000	45675000
chr6	rs41542812	C	G	chr6	32600000	32625000	chr6	45650000	45675000
chr6	rs12665031	C	T	chr6	45890000	45895000	chr6	44435000	44440000
chr6	rs12665031	C	T	chr6	45890000	45900000	chr6	44440000	44450000
chr6	rs12665031	C	T	chr6	45890000	45895000	chr6	44560000	44565000
chr6	rs12665031	C	T	chr6	45890000	45900000	chr6	44600000	44610000
chr6	rs12665031	C	T	chr6	45890000	45895000	chr6	44620000	44625000
chr6	rs12665031	C	T	chr6	45890000	45900000	chr6	44620000	44630000
chr6	rs12665031	C	T	chr6	45890000	45895000	chr6	45385000	45390000
chr6	rs12665031	C	T	chr6	45890000	45900000	chr6	45680000	45690000
chr6	rs12665031	C	T	chr6	45875000	45900000	chr6	45375000	45400000
chr6	rs3777548	G	A	chr6	45890000	45895000	chr6	44435000	44440000
chr6	rs3777548	G	A	chr6	45890000	45900000	chr6	44440000	44450000
chr6	rs3777548	G	A	chr6	45890000	45895000	chr6	44560000	44565000
chr6	rs3777548	G	A	chr6	45890000	45900000	chr6	44600000	44610000
chr6	rs3777548	G	A	chr6	45890000	45895000	chr6	44620000	44625000
chr6	rs3777548	G	A	chr6	45890000	45900000	chr6	44620000	44630000
chr6	rs3777548	G	A	chr6	45890000	45895000	chr6	45385000	45390000
chr6	rs3777548	G	A	chr6	45890000	45900000	chr6	45680000	45690000
chr6	rs3777548	G	A	chr6	45875000	45900000	chr6	45375000	45400000
chr6	rs1361215	C	T	chr6	45890000	45895000	chr6	44435000	44440000
chr6	rs1361215	C	T	chr6	45890000	45900000	chr6	44440000	44450000
chr6	rs1361215	C	T	chr6	45890000	45895000	chr6	44560000	44565000
chr6	rs1361215	C	T	chr6	45890000	45900000	chr6	44600000	44610000
chr6	rs1361215	C	T	chr6	45890000	45895000	chr6	44620000	44625000
chr6	rs1361215	C	T	chr6	45890000	45900000	chr6	44620000	44630000
chr6	rs1361215	C	T	chr6	45890000	45895000	chr6	45385000	45390000
chr6	rs1361215	C	T	chr6	45890000	45900000	chr6	45680000	45690000
chr6	rs1361215	C	T	chr6	45875000	45900000	chr6	45375000	45400000
chr6	rs1416167	A	T	chr6	45890000	45895000	chr6	44435000	44440000
chr6	rs1416167	A	T	chr6	45890000	45900000	chr6	44440000	44450000
chr6	rs1416167	A	T	chr6	45890000	45895000	chr6	44560000	44565000
chr6	rs1416167	A	T	chr6	45890000	45900000	chr6	44600000	44610000
chr6	rs1416167	A	T	chr6	45890000	45895000	chr6	44620000	44625000
chr6	rs1416167	A	T	chr6	45890000	45900000	chr6	44620000	44630000
chr6	rs1416167	A	T	chr6	45890000	45895000	chr6	45385000	45390000
chr6	rs1416167	A	T	chr6	45890000	45900000	chr6	45680000	45690000
chr6	rs1416167	A	T	chr6	45875000	45900000	chr6	45375000	45400000
chr6	rs9369590	T	C	chr6	45890000	45895000	chr6	44435000	44440000
chr6	rs9369590	T	C	chr6	45890000	45900000	chr6	44440000	44450000
chr6	rs9369590	T	C	chr6	45890000	45895000	chr6	44560000	44565000
chr6	rs9369590	T	C	chr6	45890000	45900000	chr6	44600000	44610000
chr6	rs9369590	T	C	chr6	45890000	45895000	chr6	44620000	44625000
chr6	rs9369590	T	C	chr6	45890000	45900000	chr6	44620000	44630000
chr6	rs9369590	T	C	chr6	45890000	45895000	chr6	45385000	45390000
chr6	rs9369590	T	C	chr6	45890000	45900000	chr6	45680000	45690000
chr6	rs9369590	T	C	chr6	45875000	45900000	chr6	45375000	45400000
chr6	rs3822876	G	T	chr6	45890000	45895000	chr6	44435000	44440000
chr6	rs3822876	G	T	chr6	45890000	45900000	chr6	44440000	44450000
chr6	rs3822876	G	T	chr6	45890000	45895000	chr6	44560000	44565000
chr6	rs3822876	G	T	chr6	45890000	45900000	chr6	44600000	44610000
chr6	rs3822876	G	T	chr6	45890000	45895000	chr6	44620000	44625000
chr6	rs3822876	G	T	chr6	45890000	45900000	chr6	44620000	44630000
chr6	rs3822876	G	T	chr6	45890000	45895000	chr6	45385000	45390000
chr6	rs3822876	G	T	chr6	45890000	45900000	chr6	45680000	45690000
chr6	rs3822876	G	T	chr6	45875000	45900000	chr6	45375000	45400000
chr6	rs3822878	G	A	chr6	45890000	45895000	chr6	44435000	44440000
chr6	rs3822878	G	A	chr6	45890000	45900000	chr6	44440000	44450000
chr6	rs3822878	G	A	chr6	45890000	45895000	chr6	44560000	44565000
chr6	rs3822878	G	A	chr6	45890000	45900000	chr6	44600000	44610000
chr6	rs3822878	G	A	chr6	45890000	45895000	chr6	44620000	44625000
chr6	rs3822878	G	A	chr6	45890000	45900000	chr6	44620000	44630000
chr6	rs3822878	G	A	chr6	45890000	45895000	chr6	45385000	45390000
chr6	rs3822878	G	A	chr6	45890000	45900000	chr6	45680000	45690000
chr6	rs3822878	G	A	chr6	45875000	45900000	chr6	45375000	45400000
chr6	rs3822879	A	T	chr6	45890000	45895000	chr6	44435000	44440000
chr6	rs3822879	A	T	chr6	45890000	45900000	chr6	44440000	44450000
chr6	rs3822879	A	T	chr6	45890000	45895000	chr6	44560000	44565000
chr6	rs3822879	A	T	chr6	45890000	45900000	chr6	44600000	44610000
chr6	rs3822879	A	T	chr6	45890000	45895000	chr6	44620000	44625000
chr6	rs3822879	A	T	chr6	45890000	45900000	chr6	44620000	44630000
chr6	rs3822879	A	T	chr6	45890000	45895000	chr6	45385000	45390000
chr6	rs3822879	A	T	chr6	45890000	45900000	chr6	45680000	45690000
chr6	rs3822879	A	T	chr6	45875000	45900000	chr6	45375000	45400000
chr6	rs3822880	C	T	chr6	45890000	45895000	chr6	44435000	44440000
chr6	rs3822880	C	T	chr6	45890000	45900000	chr6	44440000	44450000
chr6	rs3822880	C	T	chr6	45890000	45895000	chr6	44560000	44565000
chr6	rs3822880	C	T	chr6	45890000	45900000	chr6	44600000	44610000
chr6	rs3822880	C	T	chr6	45890000	45895000	chr6	44620000	44625000
chr6	rs3822880	C	T	chr6	45890000	45900000	chr6	44620000	44630000
chr6	rs3822880	C	T	chr6	45890000	45895000	chr6	45385000	45390000
chr6	rs3822880	C	T	chr6	45890000	45900000	chr6	45680000	45690000
chr6	rs3822880	C	T	chr6	45875000	45900000	chr6	45375000	45400000
chr6	rs3822881	A	T	chr6	45890000	45895000	chr6	44435000	44440000
chr6	rs3822881	A	T	chr6	45890000	45900000	chr6	44440000	44450000
chr6	rs3822881	A	T	chr6	45890000	45895000	chr6	44560000	44565000
chr6	rs3822881	A	T	chr6	45890000	45900000	chr6	44600000	44610000
chr6	rs3822881	A	T	chr6	45890000	45895000	chr6	44620000	44625000
chr6	rs3822881	A	T	chr6	45890000	45900000	chr6	44620000	44630000
chr6	rs3822881	A	T	chr6	45890000	45895000	chr6	45385000	45390000
chr6	rs3822881	A	T	chr6	45890000	45900000	chr6	45680000	45690000
chr6	rs3822881	A	T	chr6	45875000	45900000	chr6	45375000	45400000
chr6	rs3729618	A	G	chr6	45890000	45895000	chr6	44435000	44440000
chr6	rs3729618	A	G	chr6	45890000	45900000	chr6	44440000	44450000
chr6	rs3729618	A	G	chr6	45890000	45895000	chr6	44560000	44565000
chr6	rs3729618	A	G	chr6	45890000	45900000	chr6	44600000	44610000
chr6	rs3729618	A	G	chr6	45890000	45895000	chr6	44620000	44625000
chr6	rs3729618	A	G	chr6	45890000	45900000	chr6	44620000	44630000
chr6	rs3729618	A	G	chr6	45890000	45895000	chr6	45385000	45390000
chr6	rs3729618	A	G	chr6	45890000	45900000	chr6	45680000	45690000
chr6	rs3729618	A	G	chr6	45875000	45900000	chr6	45375000	45400000
chr6	rs3777552	A	G	chr6	45890000	45895000	chr6	44435000	44440000
chr6	rs3777552	A	G	chr6	45890000	45900000	chr6	44440000	44450000
chr6	rs3777552	A	G	chr6	45890000	45895000	chr6	44560000	44565000
chr6	rs3777552	A	G	chr6	45890000	45900000	chr6	44600000	44610000
chr6	rs3777552	A	G	chr6	45890000	45895000	chr6	44620000	44625000
chr6	rs3777552	A	G	chr6	45890000	45900000	chr6	44620000	44630000
chr6	rs3777552	A	G	chr6	45890000	45895000	chr6	45385000	45390000
chr6	rs3777552	A	G	chr6	45890000	45900000	chr6	45680000	45690000
chr6	rs3777552	A	G	chr6	45875000	45900000	chr6	45375000	45400000
chr6	rs3777553	C	A	chr6	45890000	45895000	chr6	44435000	44440000
chr6	rs3777553	C	A	chr6	45890000	45900000	chr6	44440000	44450000
chr6	rs3777553	C	A	chr6	45890000	45895000	chr6	44560000	44565000
chr6	rs3777553	C	A	chr6	45890000	45900000	chr6	44600000	44610000
chr6	rs3777553	C	A	chr6	45890000	45895000	chr6	44620000	44625000
chr6	rs3777553	C	A	chr6	45890000	45900000	chr6	44620000	44630000
chr6	rs3777553	C	A	chr6	45890000	45895000	chr6	45385000	45390000
chr6	rs3777553	C	A	chr6	45890000	45900000	chr6	45680000	45690000
chr6	rs3777553	C	A	chr6	45875000	45900000	chr6	45375000	45400000
chr6	rs3798258	T	C	chr6	45890000	45895000	chr6	44435000	44440000
chr6	rs3798258	T	C	chr6	45890000	45900000	chr6	44440000	44450000
chr6	rs3798258	T	C	chr6	45890000	45895000	chr6	44560000	44565000
chr6	rs3798258	T	C	chr6	45890000	45900000	chr6	44600000	44610000
chr6	rs3798258	T	C	chr6	45890000	45895000	chr6	44620000	44625000
chr6	rs3798258	T	C	chr6	45890000	45900000	chr6	44620000	44630000
chr6	rs3798258	T	C	chr6	45890000	45895000	chr6	45385000	45390000
chr6	rs3798258	T	C	chr6	45890000	45900000	chr6	45680000	45690000
chr6	rs3798258	T	C	chr6	45875000	45900000	chr6	45375000	45400000
chr6	rs3798259	G	T	chr6	45890000	45895000	chr6	44435000	44440000
chr6	rs3798259	G	T	chr6	45890000	45900000	chr6	44440000	44450000
chr6	rs3798259	G	T	chr6	45890000	45895000	chr6	44560000	44565000
chr6	rs3798259	G	T	chr6	45890000	45900000	chr6	44600000	44610000
chr6	rs3798259	G	T	chr6	45890000	45895000	chr6	44620000	44625000
chr6	rs3798259	G	T	chr6	45890000	45900000	chr6	44620000	44630000
chr6	rs3798259	G	T	chr6	45890000	45895000	chr6	45385000	45390000
chr6	rs3798259	G	T	chr6	45890000	45900000	chr6	45680000	45690000
chr6	rs3798259	G	T	chr6	45875000	45900000	chr6	45375000	45400000
chr6	rs3777554	T	C	chr6	45890000	45895000	chr6	44435000	44440000
chr6	rs3777554	T	C	chr6	45890000	45900000	chr6	44440000	44450000
chr6	rs3777554	T	C	chr6	45890000	45895000	chr6	44560000	44565000
chr6	rs3777554	T	C	chr6	45890000	45900000	chr6	44600000	44610000
chr6	rs3777554	T	C	chr6	45890000	45895000	chr6	44620000	44625000
chr6	rs3777554	T	C	chr6	45890000	45900000	chr6	44620000	44630000
chr6	rs3777554	T	C	chr6	45890000	45895000	chr6	45385000	45390000
chr6	rs3777554	T	C	chr6	45890000	45900000	chr6	45680000	45690000
chr6	rs3777554	T	C	chr6	45875000	45900000	chr6	45375000	45400000
chr6	rs6904888	A	G	chr6	45890000	45895000	chr6	44435000	44440000
chr6	rs6904888	A	G	chr6	45890000	45900000	chr6	44440000	44450000
chr6	rs6904888	A	G	chr6	45890000	45895000	chr6	44560000	44565000
chr6	rs6904888	A	G	chr6	45890000	45900000	chr6	44600000	44610000
chr6	rs6904888	A	G	chr6	45890000	45895000	chr6	44620000	44625000
chr6	rs6904888	A	G	chr6	45890000	45900000	chr6	44620000	44630000
chr6	rs6904888	A	G	chr6	45890000	45895000	chr6	45385000	45390000
chr6	rs6904888	A	G	chr6	45890000	45900000	chr6	45680000	45690000
chr6	rs6904888	A	G	chr6	45875000	45900000	chr6	45375000	45400000
chr6	rs12204991	A	T	chr6	45890000	45895000	chr6	44435000	44440000
chr6	rs12204991	A	T	chr6	45890000	45900000	chr6	44440000	44450000
chr6	rs12204991	A	T	chr6	45890000	45895000	chr6	44560000	44565000
chr6	rs12204991	A	T	chr6	45890000	45900000	chr6	44600000	44610000
chr6	rs12204991	A	T	chr6	45890000	45895000	chr6	44620000	44625000
chr6	rs12204991	A	T	chr6	45890000	45900000	chr6	44620000	44630000
chr6	rs12204991	A	T	chr6	45890000	45895000	chr6	45385000	45390000
chr6	rs12204991	A	T	chr6	45890000	45900000	chr6	45680000	45690000
chr6	rs12204991	A	T	chr6	45875000	45900000	chr6	45375000	45400000
chr6	rs9381410	T	C	chr6	45895000	45900000	chr6	46375000	46380000
chr6	rs9381410	T	C	chr6	45890000	45895000	chr6	44435000	44440000
chr6	rs9381410	T	C	chr6	45890000	45900000	chr6	44440000	44450000
chr6	rs9381410	T	C	chr6	45890000	45895000	chr6	44560000	44565000
chr6	rs9381410	T	C	chr6	45890000	45900000	chr6	44600000	44610000
chr6	rs9381410	T	C	chr6	45890000	45895000	chr6	44620000	44625000
chr6	rs9381410	T	C	chr6	45890000	45900000	chr6	44620000	44630000
chr6	rs9381410	T	C	chr6	45890000	45895000	chr6	45385000	45390000
chr6	rs9381410	T	C	chr6	45890000	45900000	chr6	45680000	45690000
chr6	rs9381410	T	C	chr6	45875000	45900000	chr6	45375000	45400000
chr6	rs3777556	T	C	chr6	45895000	45900000	chr6	46375000	46380000
chr6	rs3777556	T	C	chr6	45890000	45895000	chr6	44435000	44440000
chr6	rs3777556	T	C	chr6	45890000	45900000	chr6	44440000	44450000
chr6	rs3777556	T	C	chr6	45890000	45895000	chr6	44560000	44565000
chr6	rs3777556	T	C	chr6	45890000	45900000	chr6	44600000	44610000
chr6	rs3777556	T	C	chr6	45890000	45895000	chr6	44620000	44625000
chr6	rs3777556	T	C	chr6	45890000	45900000	chr6	44620000	44630000
chr6	rs3777556	T	C	chr6	45890000	45895000	chr6	45385000	45390000
chr6	rs3777556	T	C	chr6	45890000	45900000	chr6	45680000	45690000
chr6	rs3777556	T	C	chr6	45875000	45900000	chr6	45375000	45400000
chr6	rs3777557	T	C	chr6	45895000	45900000	chr6	46375000	46380000
chr6	rs3777557	T	C	chr6	45890000	45895000	chr6	44435000	44440000
chr6	rs3777557	T	C	chr6	45890000	45900000	chr6	44440000	44450000
chr6	rs3777557	T	C	chr6	45890000	45895000	chr6	44560000	44565000
chr6	rs3777557	T	C	chr6	45890000	45900000	chr6	44600000	44610000
chr6	rs3777557	T	C	chr6	45890000	45895000	chr6	44620000	44625000
chr6	rs3777557	T	C	chr6	45890000	45900000	chr6	44620000	44630000
chr6	rs3777557	T	C	chr6	45890000	45895000	chr6	45385000	45390000
chr6	rs3777557	T	C	chr6	45890000	45900000	chr6	45680000	45690000
chr6	rs3777557	T	C	chr6	45875000	45900000	chr6	45375000	45400000
chr6	rs3777558	T	C	chr6	45895000	45900000	chr6	46375000	46380000
chr6	rs3777558	T	C	chr6	45890000	45895000	chr6	44435000	44440000
chr6	rs3777558	T	C	chr6	45890000	45900000	chr6	44440000	44450000
chr6	rs3777558	T	C	chr6	45890000	45895000	chr6	44560000	44565000
chr6	rs3777558	T	C	chr6	45890000	45900000	chr6	44600000	44610000
chr6	rs3777558	T	C	chr6	45890000	45895000	chr6	44620000	44625000
chr6	rs3777558	T	C	chr6	45890000	45900000	chr6	44620000	44630000
chr6	rs3777558	T	C	chr6	45890000	45895000	chr6	45385000	45390000
chr6	rs3777558	T	C	chr6	45890000	45900000	chr6	45680000	45690000
chr6	rs3777558	T	C	chr6	45875000	45900000	chr6	45375000	45400000
chr6	rs3777559	G	A	chr6	45895000	45900000	chr6	46375000	46380000
chr6	rs3777559	G	A	chr6	45890000	45895000	chr6	44435000	44440000
chr6	rs3777559	G	A	chr6	45890000	45900000	chr6	44440000	44450000
chr6	rs3777559	G	A	chr6	45890000	45895000	chr6	44560000	44565000
chr6	rs3777559	G	A	chr6	45890000	45900000	chr6	44600000	44610000
chr6	rs3777559	G	A	chr6	45890000	45895000	chr6	44620000	44625000
chr6	rs3777559	G	A	chr6	45890000	45900000	chr6	44620000	44630000
chr6	rs3777559	G	A	chr6	45890000	45895000	chr6	45385000	45390000
chr6	rs3777559	G	A	chr6	45890000	45900000	chr6	45680000	45690000
chr6	rs3777559	G	A	chr6	45875000	45900000	chr6	45375000	45400000
chr6	rs9367229	T	C	chr6	45895000	45900000	chr6	46375000	46380000
chr6	rs9367229	T	C	chr6	45890000	45895000	chr6	44435000	44440000
chr6	rs9367229	T	C	chr6	45890000	45900000	chr6	44440000	44450000
chr6	rs9367229	T	C	chr6	45890000	45895000	chr6	44560000	44565000
chr6	rs9367229	T	C	chr6	45890000	45900000	chr6	44600000	44610000
chr6	rs9367229	T	C	chr6	45890000	45895000	chr6	44620000	44625000
chr6	rs9367229	T	C	chr6	45890000	45900000	chr6	44620000	44630000
chr6	rs9367229	T	C	chr6	45890000	45895000	chr6	45385000	45390000
chr6	rs9367229	T	C	chr6	45890000	45900000	chr6	45680000	45690000
chr6	rs9367229	T	C	chr6	45875000	45900000	chr6	45375000	45400000
chr6	rs9381411	T	A	chr6	45895000	45900000	chr6	46375000	46380000
chr6	rs9381411	T	A	chr6	45890000	45895000	chr6	44435000	44440000
chr6	rs9381411	T	A	chr6	45890000	45900000	chr6	44440000	44450000
chr6	rs9381411	T	A	chr6	45890000	45895000	chr6	44560000	44565000
chr6	rs9381411	T	A	chr6	45890000	45900000	chr6	44600000	44610000
chr6	rs9381411	T	A	chr6	45890000	45895000	chr6	44620000	44625000
chr6	rs9381411	T	A	chr6	45890000	45900000	chr6	44620000	44630000
chr6	rs9381411	T	A	chr6	45890000	45895000	chr6	45385000	45390000
chr6	rs9381411	T	A	chr6	45890000	45900000	chr6	45680000	45690000
chr6	rs9381411	T	A	chr6	45875000	45900000	chr6	45375000	45400000
chr6	rs9349336	G	A	chr6	45895000	45900000	chr6	46375000	46380000
chr6	rs9349336	G	A	chr6	45890000	45895000	chr6	44435000	44440000
chr6	rs9349336	G	A	chr6	45890000	45900000	chr6	44440000	44450000
chr6	rs9349336	G	A	chr6	45890000	45895000	chr6	44560000	44565000
chr6	rs9349336	G	A	chr6	45890000	45900000	chr6	44600000	44610000
chr6	rs9349336	G	A	chr6	45890000	45895000	chr6	44620000	44625000
chr6	rs9349336	G	A	chr6	45890000	45900000	chr6	44620000	44630000
chr6	rs9349336	G	A	chr6	45890000	45895000	chr6	45385000	45390000
chr6	rs9349336	G	A	chr6	45890000	45900000	chr6	45680000	45690000
chr6	rs9349336	G	A	chr6	45875000	45900000	chr6	45375000	45400000
chr6	rs9395134	G	A	chr6	45895000	45900000	chr6	46375000	46380000
chr6	rs9395134	G	A	chr6	45890000	45895000	chr6	44435000	44440000
chr6	rs9395134	G	A	chr6	45890000	45900000	chr6	44440000	44450000
chr6	rs9395134	G	A	chr6	45890000	45895000	chr6	44560000	44565000
chr6	rs9395134	G	A	chr6	45890000	45900000	chr6	44600000	44610000
chr6	rs9395134	G	A	chr6	45890000	45895000	chr6	44620000	44625000
chr6	rs9395134	G	A	chr6	45890000	45900000	chr6	44620000	44630000
chr6	rs9395134	G	A	chr6	45890000	45895000	chr6	45385000	45390000
chr6	rs9395134	G	A	chr6	45890000	45900000	chr6	45680000	45690000
chr6	rs9395134	G	A	chr6	45875000	45900000	chr6	45375000	45400000
chr6	rs10807328	G	A	chr6	45895000	45900000	chr6	46375000	46380000
chr6	rs10807328	G	A	chr6	45890000	45895000	chr6	44435000	44440000
chr6	rs10807328	G	A	chr6	45890000	45900000	chr6	44440000	44450000
chr6	rs10807328	G	A	chr6	45890000	45895000	chr6	44560000	44565000
chr6	rs10807328	G	A	chr6	45890000	45900000	chr6	44600000	44610000
chr6	rs10807328	G	A	chr6	45890000	45895000	chr6	44620000	44625000
chr6	rs10807328	G	A	chr6	45890000	45900000	chr6	44620000	44630000
chr6	rs10807328	G	A	chr6	45890000	45895000	chr6	45385000	45390000
chr6	rs10807328	G	A	chr6	45890000	45900000	chr6	45680000	45690000
chr6	rs10807328	G	A	chr6	45875000	45900000	chr6	45375000	45400000
chr6	rs6939554	C	T	chr6	45895000	45900000	chr6	46375000	46380000
chr6	rs6939554	C	T	chr6	45890000	45895000	chr6	44435000	44440000
chr6	rs6939554	C	T	chr6	45890000	45900000	chr6	44440000	44450000
chr6	rs6939554	C	T	chr6	45890000	45895000	chr6	44560000	44565000
chr6	rs6939554	C	T	chr6	45890000	45900000	chr6	44600000	44610000
chr6	rs6939554	C	T	chr6	45890000	45895000	chr6	44620000	44625000
chr6	rs6939554	C	T	chr6	45890000	45900000	chr6	44620000	44630000
chr6	rs6939554	C	T	chr6	45890000	45895000	chr6	45385000	45390000
chr6	rs6939554	C	T	chr6	45890000	45900000	chr6	45680000	45690000
chr6	rs6939554	C	T	chr6	45875000	45900000	chr6	45375000	45400000
chr6	rs6940409	G	A	chr6	45895000	45900000	chr6	46375000	46380000
chr6	rs6940409	G	A	chr6	45890000	45895000	chr6	44435000	44440000
chr6	rs6940409	G	A	chr6	45890000	45900000	chr6	44440000	44450000
chr6	rs6940409	G	A	chr6	45890000	45895000	chr6	44560000	44565000
chr6	rs6940409	G	A	chr6	45890000	45900000	chr6	44600000	44610000
chr6	rs6940409	G	A	chr6	45890000	45895000	chr6	44620000	44625000
chr6	rs6940409	G	A	chr6	45890000	45900000	chr6	44620000	44630000
chr6	rs6940409	G	A	chr6	45890000	45895000	chr6	45385000	45390000
chr6	rs6940409	G	A	chr6	45890000	45900000	chr6	45680000	45690000
chr6	rs6940409	G	A	chr6	45875000	45900000	chr6	45375000	45400000
chr6	rs111415789	A	G	chr6	52460000	52465000	chr6	52280000	52285000
chr6	rs111415789	A	G	chr6	52460000	52465000	chr6	52515000	52520000
chr6	rs142191463	A	G	chr6	65390000	65395000	chr6	65520000	65525000
chr6	rs144526335	G	A	chr6	144260000	144265000	chr6	143895000	143900000
chr6	rs144526335	G	A	chr6	144260000	144265000	chr6	144330000	144335000
chr6	rs117255767	G	A	chr6	144260000	144265000	chr6	143895000	143900000
chr6	rs117255767	G	A	chr6	144260000	144265000	chr6	144330000	144335000
chr6	rs78620166	G	A	chr6	146850000	146875000	chr6	147600000	147625000
chr6	rs78620166	G	A	chr6	146860000	146870000	chr6	146280000	146290000
chr6	rs78620166	G	A	chr6	146865000	146870000	chr6	146610000	146615000
chr6	rs78620166	G	A	chr6	146865000	146870000	chr6	147010000	147015000
chr6	rs78620166	G	A	chr6	146865000	146870000	chr6	147015000	147020000
chr6	rs9373523	T	G	chr6	147700000	147725000	chr6	148475000	148500000
chr6	rs2499644	A	G	chr6	154670000	154680000	chr6	154480000	154490000
chr6	rs2499643	A	G	chr6	154670000	154680000	chr6	154480000	154490000
chr6	rs2499642	A	G	chr6	154670000	154680000	chr6	154480000	154490000
chr6	rs2499641	T	C	chr6	154670000	154680000	chr6	154480000	154490000
chr6	rs2499640	G	A	chr6	154670000	154680000	chr6	154480000	154490000
chr6	rs2499639	G	A	chr6	154670000	154680000	chr6	154480000	154490000
chr6	rs2499638	T	G	chr6	154670000	154680000	chr6	154480000	154490000
chr6	rs2499637	G	A	chr6	154670000	154680000	chr6	154480000	154490000
chr6	rs2499636	A	G	chr6	154670000	154680000	chr6	154480000	154490000
chr6	rs2499636	A	G	chr6	154675000	154680000	chr6	154575000	154580000
chr6	rs2499636	A	G	chr6	154675000	154680000	chr6	154620000	154625000
chr6	rs2499635	G	A	chr6	154670000	154680000	chr6	154480000	154490000
chr6	rs2499635	G	A	chr6	154675000	154680000	chr6	154575000	154580000
chr6	rs2499635	G	A	chr6	154675000	154680000	chr6	154620000	154625000
chr6	rs2473543	C	T	chr6	154670000	154680000	chr6	154480000	154490000
chr6	rs2473543	C	T	chr6	154675000	154680000	chr6	154575000	154580000
chr6	rs2473543	C	T	chr6	154675000	154680000	chr6	154620000	154625000
chr6	rs2473544	T	C	chr6	154670000	154680000	chr6	154480000	154490000
chr6	rs2473544	T	C	chr6	154675000	154680000	chr6	154575000	154580000
chr6	rs2473544	T	C	chr6	154675000	154680000	chr6	154620000	154625000
chr7	rs2681052	A	C	chr7	11650000	11675000	chr7	5450000	5475000
chr7	rs212837	T	C	chr7	26700000	26725000	chr7	26100000	26125000
chr7	rs212837	T	C	chr7	26700000	26710000	chr7	26130000	26140000
chr7	rs212837	T	C	chr7	26700000	26725000	chr7	26225000	26250000
chr7	rs757129	C	G	chr7	26700000	26725000	chr7	26100000	26125000
chr7	rs757129	C	G	chr7	26700000	26710000	chr7	26130000	26140000
chr7	rs757129	C	G	chr7	26700000	26725000	chr7	26225000	26250000
chr7	rs757129	C	G	chr7	26705000	26710000	chr7	25930000	25935000
chr7	rs757129	C	G	chr7	26705000	26710000	chr7	26405000	26410000
chr7	rs757129	C	G	chr7	26705000	26710000	chr7	26410000	26415000
chr7	rs212845	C	T	chr7	26700000	26725000	chr7	26100000	26125000
chr7	rs212845	C	T	chr7	26700000	26725000	chr7	26225000	26250000
chr7	rs212845	C	T	chr7	26720000	26725000	chr7	26890000	26895000
chr7	rs212845	C	T	chr7	26720000	26725000	chr7	27175000	27180000
chr7	rs212845	C	T	chr7	26720000	26730000	chr7	27960000	27970000
chr7	rs212854	C	G	chr7	26700000	26725000	chr7	26100000	26125000
chr7	rs212854	C	G	chr7	26700000	26725000	chr7	26225000	26250000
chr7	rs212854	C	G	chr7	26720000	26725000	chr7	26890000	26895000
chr7	rs212854	C	G	chr7	26720000	26725000	chr7	27175000	27180000
chr7	rs212854	C	G	chr7	26720000	26730000	chr7	27960000	27970000
chr7	rs4720118	T	C	chr7	33460000	33470000	chr7	33930000	33940000
chr7	rs1004107	A	T	chr7	115865000	115870000	chr7	115830000	115835000
chr7	rs9969224	T	C	chr7	115865000	115870000	chr7	115830000	115835000
chr7	rs1004109	A	T	chr7	115865000	115870000	chr7	115830000	115835000
chr7	rs1000966	A	G	chr7	115865000	115870000	chr7	115830000	115835000
chr7	rs3807968	G	A	chr7	115865000	115870000	chr7	115830000	115835000
chr7	rs3779509	C	A	chr7	115865000	115870000	chr7	115830000	115835000
chr7	rs1881287	A	G	chr7	115870000	115880000	chr7	115810000	115820000
chr7	rs1881287	A	G	chr7	115865000	115870000	chr7	115830000	115835000
chr7	rs58624059	T	C	chr7	115870000	115880000	chr7	115810000	115820000
chr7	rs58624059	T	C	chr7	115865000	115870000	chr7	115830000	115835000
chr7	rs12670683	T	C	chr7	115870000	115880000	chr7	115810000	115820000
chr7	rs12670683	T	C	chr7	115875000	115880000	chr7	115815000	115820000
chr7	rs12670683	T	C	chr7	115865000	115870000	chr7	115830000	115835000
chr7	rs2030978	C	T	chr7	115870000	115880000	chr7	115810000	115820000
chr7	rs2030978	C	T	chr7	115875000	115880000	chr7	115815000	115820000
chr7	rs2030978	C	T	chr7	115865000	115870000	chr7	115830000	115835000
chr7	rs2030977	G	C	chr7	115870000	115880000	chr7	115810000	115820000
chr7	rs2030977	G	C	chr7	115875000	115880000	chr7	115815000	115820000
chr7	rs6959237	C	T	chr7	115870000	115880000	chr7	115810000	115820000
chr7	rs6959237	C	T	chr7	115875000	115880000	chr7	115815000	115820000
chr7	rs3807975	G	A	chr7	115870000	115880000	chr7	115810000	115820000
chr7	rs3807975	G	A	chr7	115875000	115880000	chr7	115815000	115820000
chr7	rs66652906	G	A	chr7	115870000	115880000	chr7	115810000	115820000
chr7	rs66652906	G	A	chr7	115875000	115880000	chr7	115815000	115820000
chr7	rs58595078	A	G	chr7	115870000	115880000	chr7	115810000	115820000
chr7	rs58595078	A	G	chr7	115875000	115880000	chr7	115815000	115820000
chr7	rs3757730	G	A	chr7	115870000	115880000	chr7	115810000	115820000
chr7	rs3757730	G	A	chr7	115875000	115880000	chr7	115815000	115820000
chr7	rs58495099	G	C	chr7	115870000	115880000	chr7	115810000	115820000
chr7	rs58495099	G	C	chr7	115875000	115880000	chr7	115815000	115820000
chr7	rs57321537	T	G	chr7	115870000	115880000	chr7	115810000	115820000
chr7	rs57321537	T	G	chr7	115875000	115880000	chr7	115815000	115820000
chr7	rs138623810	C	A	chr7	115870000	115880000	chr7	115810000	115820000
chr7	rs138623810	C	A	chr7	115875000	115880000	chr7	115815000	115820000
chr7	rs7811984	A	G	chr7	115890000	115900000	chr7	116160000	116170000
chr7	rs7811984	A	G	chr7	115890000	115900000	chr7	116440000	116450000
chr7	rs73719150	C	T	chr7	115890000	115900000	chr7	116160000	116170000
chr7	rs73719150	C	T	chr7	115890000	115900000	chr7	116440000	116450000
chr7	rs6953050	A	G	chr7	115890000	115900000	chr7	116160000	116170000
chr7	rs6953050	A	G	chr7	115890000	115900000	chr7	116440000	116450000
chr7	rs6957561	G	A	chr7	115890000	115900000	chr7	116160000	116170000
chr7	rs6957561	G	A	chr7	115890000	115900000	chr7	116440000	116450000
chr7	rs1048508	T	G	chr7	115890000	115900000	chr7	116160000	116170000
chr7	rs1048508	T	G	chr7	115890000	115900000	chr7	116440000	116450000
chr7	rs1048508	T	G	chr7	115895000	115900000	chr7	116225000	116230000
chr7	rs1048508	T	G	chr7	115895000	115900000	chr7	116445000	116450000
chr7	rs1048508	T	G	chr7	115895000	115900000	chr7	116450000	116455000
chr7	rs17138472	A	G	chr7	115890000	115900000	chr7	116160000	116170000
chr7	rs17138472	A	G	chr7	115890000	115900000	chr7	116440000	116450000
chr7	rs17138472	A	G	chr7	115895000	115900000	chr7	116225000	116230000
chr7	rs17138472	A	G	chr7	115895000	115900000	chr7	116445000	116450000
chr7	rs17138472	A	G	chr7	115895000	115900000	chr7	116450000	116455000
chr7	rs3823977	A	T	chr7	115890000	115900000	chr7	116160000	116170000
chr7	rs3823977	A	T	chr7	115890000	115900000	chr7	116440000	116450000
chr7	rs3823977	A	T	chr7	115895000	115900000	chr7	116225000	116230000
chr7	rs3823977	A	T	chr7	115895000	115900000	chr7	116445000	116450000
chr7	rs3823977	A	T	chr7	115895000	115900000	chr7	116450000	116455000
chr7	rs3807980	A	G	chr7	115890000	115900000	chr7	116160000	116170000
chr7	rs3807980	A	G	chr7	115890000	115900000	chr7	116440000	116450000
chr7	rs3807980	A	G	chr7	115895000	115900000	chr7	116225000	116230000
chr7	rs3807980	A	G	chr7	115895000	115900000	chr7	116445000	116450000
chr7	rs3807980	A	G	chr7	115895000	115900000	chr7	116450000	116455000
chr7	rs17138483	A	C	chr7	115890000	115900000	chr7	116160000	116170000
chr7	rs17138483	A	C	chr7	115890000	115900000	chr7	116440000	116450000
chr7	rs17138483	A	C	chr7	115895000	115900000	chr7	116225000	116230000
chr7	rs17138483	A	C	chr7	115895000	115900000	chr7	116445000	116450000
chr7	rs17138483	A	C	chr7	115895000	115900000	chr7	116450000	116455000
chr7	rs73452247	T	C	chr7	115890000	115900000	chr7	116160000	116170000
chr7	rs73452247	T	C	chr7	115890000	115900000	chr7	116440000	116450000
chr7	rs73452247	T	C	chr7	115895000	115900000	chr7	116225000	116230000
chr7	rs73452247	T	C	chr7	115895000	115900000	chr7	116445000	116450000
chr7	rs73452247	T	C	chr7	115895000	115900000	chr7	116450000	116455000
chr7	rs72603593	T	C	chr7	115890000	115900000	chr7	116160000	116170000
chr7	rs72603593	T	C	chr7	115890000	115900000	chr7	116440000	116450000
chr7	rs72603593	T	C	chr7	115895000	115900000	chr7	116225000	116230000
chr7	rs72603593	T	C	chr7	115895000	115900000	chr7	116445000	116450000
chr7	rs72603593	T	C	chr7	115895000	115900000	chr7	116450000	116455000
chr7	rs17138486	C	G	chr7	115890000	115900000	chr7	116160000	116170000
chr7	rs17138486	C	G	chr7	115890000	115900000	chr7	116440000	116450000
chr7	rs17138486	C	G	chr7	115895000	115900000	chr7	116225000	116230000
chr7	rs17138486	C	G	chr7	115895000	115900000	chr7	116445000	116450000
chr7	rs17138486	C	G	chr7	115895000	115900000	chr7	116450000	116455000
chr7	rs112016811	A	T	chr7	115890000	115900000	chr7	116160000	116170000
chr7	rs112016811	A	T	chr7	115890000	115900000	chr7	116440000	116450000
chr7	rs112016811	A	T	chr7	115895000	115900000	chr7	116225000	116230000
chr7	rs112016811	A	T	chr7	115895000	115900000	chr7	116445000	116450000
chr7	rs112016811	A	T	chr7	115895000	115900000	chr7	116450000	116455000
chr7	rs4730719	G	T	chr7	115890000	115900000	chr7	116160000	116170000
chr7	rs4730719	G	T	chr7	115890000	115900000	chr7	116440000	116450000
chr7	rs4730719	G	T	chr7	115895000	115900000	chr7	116225000	116230000
chr7	rs4730719	G	T	chr7	115895000	115900000	chr7	116445000	116450000
chr7	rs4730719	G	T	chr7	115895000	115900000	chr7	116450000	116455000
chr7	rs4730720	T	C	chr7	115890000	115900000	chr7	116160000	116170000
chr7	rs4730720	T	C	chr7	115890000	115900000	chr7	116440000	116450000
chr7	rs4730720	T	C	chr7	115895000	115900000	chr7	116225000	116230000
chr7	rs4730720	T	C	chr7	115895000	115900000	chr7	116445000	116450000
chr7	rs4730720	T	C	chr7	115895000	115900000	chr7	116450000	116455000
chr7	rs6948556	T	C	chr7	115890000	115900000	chr7	116160000	116170000
chr7	rs6948556	T	C	chr7	115890000	115900000	chr7	116440000	116450000
chr7	rs6948556	T	C	chr7	115895000	115900000	chr7	116225000	116230000
chr7	rs6948556	T	C	chr7	115895000	115900000	chr7	116445000	116450000
chr7	rs6948556	T	C	chr7	115895000	115900000	chr7	116450000	116455000
chr7	rs6966770	A	G	chr7	115890000	115900000	chr7	116160000	116170000
chr7	rs6966770	A	G	chr7	115890000	115900000	chr7	116440000	116450000
chr7	rs6966770	A	G	chr7	115895000	115900000	chr7	116225000	116230000
chr7	rs6966770	A	G	chr7	115895000	115900000	chr7	116445000	116450000
chr7	rs6966770	A	G	chr7	115895000	115900000	chr7	116450000	116455000
chr7	rs369860875	G	A	chr7	115890000	115900000	chr7	116160000	116170000
chr7	rs369860875	G	A	chr7	115890000	115900000	chr7	116440000	116450000
chr7	rs369860875	G	A	chr7	115895000	115900000	chr7	116225000	116230000
chr7	rs369860875	G	A	chr7	115895000	115900000	chr7	116445000	116450000
chr7	rs369860875	G	A	chr7	115895000	115900000	chr7	116450000	116455000
chr7	rs6967695	G	A	chr7	115890000	115900000	chr7	116160000	116170000
chr7	rs6967695	G	A	chr7	115890000	115900000	chr7	116440000	116450000
chr7	rs6967695	G	A	chr7	115895000	115900000	chr7	116225000	116230000
chr7	rs6967695	G	A	chr7	115895000	115900000	chr7	116445000	116450000
chr7	rs6967695	G	A	chr7	115895000	115900000	chr7	116450000	116455000
chr7	rs3807981	G	A	chr7	115890000	115900000	chr7	116160000	116170000
chr7	rs3807981	G	A	chr7	115890000	115900000	chr7	116440000	116450000
chr7	rs3807981	G	A	chr7	115895000	115900000	chr7	116225000	116230000
chr7	rs3807981	G	A	chr7	115895000	115900000	chr7	116445000	116450000
chr7	rs3807981	G	A	chr7	115895000	115900000	chr7	116450000	116455000
chr7	rs2402057	T	C	chr7	115890000	115900000	chr7	116160000	116170000
chr7	rs2402057	T	C	chr7	115890000	115900000	chr7	116440000	116450000
chr7	rs2402057	T	C	chr7	115895000	115900000	chr7	116225000	116230000
chr7	rs2402057	T	C	chr7	115895000	115900000	chr7	116445000	116450000
chr7	rs2402057	T	C	chr7	115895000	115900000	chr7	116450000	116455000
chr7	rs2402058	A	G	chr7	115890000	115900000	chr7	116160000	116170000
chr7	rs2402058	A	G	chr7	115890000	115900000	chr7	116440000	116450000
chr7	rs2402058	A	G	chr7	115895000	115900000	chr7	116225000	116230000
chr7	rs2402058	A	G	chr7	115895000	115900000	chr7	116445000	116450000
chr7	rs2402058	A	G	chr7	115895000	115900000	chr7	116450000	116455000
chr7	rs2402059	T	G	chr7	115890000	115900000	chr7	116160000	116170000
chr7	rs2402059	T	G	chr7	115890000	115900000	chr7	116440000	116450000
chr7	rs2402059	T	G	chr7	115895000	115900000	chr7	116225000	116230000
chr7	rs2402059	T	G	chr7	115895000	115900000	chr7	116445000	116450000
chr7	rs2402059	T	G	chr7	115895000	115900000	chr7	116450000	116455000
chr7	rs2896180	A	G	chr7	115890000	115900000	chr7	116160000	116170000
chr7	rs2896180	A	G	chr7	115890000	115900000	chr7	116440000	116450000
chr7	rs2896180	A	G	chr7	115895000	115900000	chr7	116225000	116230000
chr7	rs2896180	A	G	chr7	115895000	115900000	chr7	116445000	116450000
chr7	rs2896180	A	G	chr7	115895000	115900000	chr7	116450000	116455000
chr7	rs2896181	C	T	chr7	115890000	115900000	chr7	116160000	116170000
chr7	rs2896181	C	T	chr7	115890000	115900000	chr7	116440000	116450000
chr7	rs2896181	C	T	chr7	115895000	115900000	chr7	116225000	116230000
chr7	rs2896181	C	T	chr7	115895000	115900000	chr7	116445000	116450000
chr7	rs2896181	C	T	chr7	115895000	115900000	chr7	116450000	116455000
chr7	rs3173919	G	C	chr7	115890000	115900000	chr7	116160000	116170000
chr7	rs3173919	G	C	chr7	115890000	115900000	chr7	116440000	116450000
chr7	rs3173919	G	C	chr7	115895000	115900000	chr7	116225000	116230000
chr7	rs3173919	G	C	chr7	115895000	115900000	chr7	116445000	116450000
chr7	rs3173919	G	C	chr7	115895000	115900000	chr7	116450000	116455000
chr7	rs1141470	G	C	chr7	115890000	115900000	chr7	116160000	116170000
chr7	rs1141470	G	C	chr7	115890000	115900000	chr7	116440000	116450000
chr7	rs1141470	G	C	chr7	115895000	115900000	chr7	116225000	116230000
chr7	rs1141470	G	C	chr7	115895000	115900000	chr7	116445000	116450000
chr7	rs1141470	G	C	chr7	115895000	115900000	chr7	116450000	116455000
chr7	rs3807982	T	C	chr7	115890000	115900000	chr7	116160000	116170000
chr7	rs3807982	T	C	chr7	115890000	115900000	chr7	116440000	116450000
chr7	rs3807982	T	C	chr7	115895000	115900000	chr7	116225000	116230000
chr7	rs3807982	T	C	chr7	115895000	115900000	chr7	116445000	116450000
chr7	rs3807982	T	C	chr7	115895000	115900000	chr7	116450000	116455000
chr7	rs3807983	T	C	chr7	115890000	115900000	chr7	116160000	116170000
chr7	rs3807983	T	C	chr7	115890000	115900000	chr7	116440000	116450000
chr7	rs3807983	T	C	chr7	115895000	115900000	chr7	116225000	116230000
chr7	rs3807983	T	C	chr7	115895000	115900000	chr7	116445000	116450000
chr7	rs3807983	T	C	chr7	115895000	115900000	chr7	116450000	116455000
chr7	rs4730721	T	A	chr7	115890000	115900000	chr7	116160000	116170000
chr7	rs4730721	T	A	chr7	115890000	115900000	chr7	116440000	116450000
chr7	rs4730721	T	A	chr7	115895000	115900000	chr7	116225000	116230000
chr7	rs4730721	T	A	chr7	115895000	115900000	chr7	116445000	116450000
chr7	rs4730721	T	A	chr7	115895000	115900000	chr7	116450000	116455000
chr7	rs10242959	C	T	chr7	115890000	115900000	chr7	116160000	116170000
chr7	rs10242959	C	T	chr7	115890000	115900000	chr7	116440000	116450000
chr7	rs10242959	C	T	chr7	115895000	115900000	chr7	116225000	116230000
chr7	rs10242959	C	T	chr7	115895000	115900000	chr7	116445000	116450000
chr7	rs10242959	C	T	chr7	115895000	115900000	chr7	116450000	116455000
chr7	rs10261531	T	A	chr7	115890000	115900000	chr7	116160000	116170000
chr7	rs10261531	T	A	chr7	115890000	115900000	chr7	116440000	116450000
chr7	rs10261531	T	A	chr7	115895000	115900000	chr7	116225000	116230000
chr7	rs10261531	T	A	chr7	115895000	115900000	chr7	116445000	116450000
chr7	rs10261531	T	A	chr7	115895000	115900000	chr7	116450000	116455000
chr7	rs10500059	C	T	chr7	115890000	115900000	chr7	116160000	116170000
chr7	rs10500059	C	T	chr7	115890000	115900000	chr7	116440000	116450000
chr7	rs10500059	C	T	chr7	115895000	115900000	chr7	116225000	116230000
chr7	rs10500059	C	T	chr7	115895000	115900000	chr7	116445000	116450000
chr7	rs10500059	C	T	chr7	115895000	115900000	chr7	116450000	116455000
chr7	rs10500060	C	T	chr7	115890000	115900000	chr7	116160000	116170000
chr7	rs10500060	C	T	chr7	115890000	115900000	chr7	116440000	116450000
chr7	rs10500060	C	T	chr7	115895000	115900000	chr7	116225000	116230000
chr7	rs10500060	C	T	chr7	115895000	115900000	chr7	116445000	116450000
chr7	rs10500060	C	T	chr7	115895000	115900000	chr7	116450000	116455000
chr7	rs10500061	C	G	chr7	115890000	115900000	chr7	116160000	116170000
chr7	rs10500061	C	G	chr7	115890000	115900000	chr7	116440000	116450000
chr7	rs10500061	C	G	chr7	115895000	115900000	chr7	116225000	116230000
chr7	rs10500061	C	G	chr7	115895000	115900000	chr7	116445000	116450000
chr7	rs10500061	C	G	chr7	115895000	115900000	chr7	116450000	116455000
chr7	rs60927526	T	G	chr7	115890000	115900000	chr7	116160000	116170000
chr7	rs60927526	T	G	chr7	115890000	115900000	chr7	116440000	116450000
chr7	rs60927526	T	G	chr7	115895000	115900000	chr7	116225000	116230000
chr7	rs60927526	T	G	chr7	115895000	115900000	chr7	116445000	116450000
chr7	rs60927526	T	G	chr7	115895000	115900000	chr7	116450000	116455000
chr7	rs4730723	T	C	chr7	115890000	115900000	chr7	116160000	116170000
chr7	rs4730723	T	C	chr7	115890000	115900000	chr7	116440000	116450000
chr7	rs4730723	T	C	chr7	115895000	115900000	chr7	116225000	116230000
chr7	rs4730723	T	C	chr7	115895000	115900000	chr7	116445000	116450000
chr7	rs4730723	T	C	chr7	115895000	115900000	chr7	116450000	116455000
chr7	rs7787531	C	T	chr7	129010000	129020000	chr7	129280000	129290000
chr7	rs7787531	C	T	chr7	129000000	129025000	chr7	129450000	129475000
chr8	rs4873534	A	G	chr8	52180000	52190000	chr8	52430000	52440000
chr8	rs16915954	G	A	chr8	52180000	52190000	chr8	52430000	52440000
chr8	rs28595219	C	T	chr8	56790000	56795000	chr8	56725000	56730000
chr8	rs28595219	C	T	chr8	56790000	56800000	chr8	56880000	56890000
chr8	rs28595219	C	T	chr8	56790000	56800000	chr8	56920000	56930000
chr8	rs28595219	C	T	chr8	56795000	56800000	chr8	56755000	56760000
chr8	rs28595219	C	T	chr8	56795000	56800000	chr8	56840000	56845000
chr8	rs4738594	C	G	chr8	58325000	58330000	chr8	58905000	58910000
chr8	rs4738594	C	G	chr8	58325000	58350000	chr8	59050000	59075000
chr8	rs4738594	C	G	chr8	58325000	58330000	chr8	59305000	59310000
chr8	rs4738594	C	G	chr8	58325000	58350000	chr8	59450000	59475000
chr8	rs7822640	A	T	chr8	58330000	58335000	chr8	58400000	58405000
chr8	rs7822640	A	T	chr8	58330000	58340000	chr8	58400000	58410000
chr8	rs7822640	A	T	chr8	58330000	58340000	chr8	58650000	58660000
chr8	rs7822640	A	T	chr8	58330000	58335000	chr8	58905000	58910000
chr8	rs7822640	A	T	chr8	58325000	58330000	chr8	58905000	58910000
chr8	rs7822640	A	T	chr8	58325000	58350000	chr8	59050000	59075000
chr8	rs7822640	A	T	chr8	58325000	58330000	chr8	59305000	59310000
chr8	rs7822640	A	T	chr8	58325000	58350000	chr8	59450000	59475000
chr8	rs7845847	T	C	chr8	58330000	58335000	chr8	58400000	58405000
chr8	rs7845847	T	C	chr8	58330000	58340000	chr8	58400000	58410000
chr8	rs7845847	T	C	chr8	58330000	58340000	chr8	58650000	58660000
chr8	rs7845847	T	C	chr8	58330000	58335000	chr8	58905000	58910000
chr8	rs7845847	T	C	chr8	58325000	58330000	chr8	58905000	58910000
chr8	rs7845847	T	C	chr8	58325000	58350000	chr8	59050000	59075000
chr8	rs7845847	T	C	chr8	58325000	58330000	chr8	59305000	59310000
chr8	rs7845847	T	C	chr8	58325000	58350000	chr8	59450000	59475000
chr8	rs7830756	T	C	chr8	105260000	105270000	chr8	105430000	105440000
chr8	rs7830756	T	C	chr8	105265000	105270000	chr8	105430000	105435000
chr8	rs10100465	G	A	chr8	118625000	118650000	chr8	119425000	119450000
chr8	rs1469288	G	A	chr8	131200000	131225000	chr8	131675000	131700000
chr8	rs1017281	G	A	chr8	131250000	131275000	chr8	130625000	130650000
chr8	rs10956514	A	G	chr8	131250000	131275000	chr8	130625000	130650000
chr8	rs12680942	A	G	chr8	131250000	131275000	chr8	130625000	130650000
chr8	rs2033059	C	T	chr8	131250000	131275000	chr8	130625000	130650000
chr8	rs4733781	A	C	chr8	131290000	131300000	chr8	131340000	131350000
chr8	rs4733781	A	C	chr8	131290000	131295000	chr8	131365000	131370000
chr8	rs4733781	A	C	chr8	131290000	131295000	chr8	131450000	131455000
chr8	rs4733781	A	C	chr8	131290000	131300000	chr8	131450000	131460000
chr8	rs17285138	T	A	chr8	131290000	131300000	chr8	131340000	131350000
chr8	rs17285138	T	A	chr8	131290000	131295000	chr8	131365000	131370000
chr8	rs17285138	T	A	chr8	131290000	131295000	chr8	131450000	131455000
chr8	rs17285138	T	A	chr8	131290000	131300000	chr8	131450000	131460000
chr9	rs7858547	T	C	chr9	19470000	19480000	chr9	19910000	19920000
chr9	rs7858547	T	C	chr9	19475000	19500000	chr9	20925000	20950000
chr9	rs1854330	A	G	chr9	78210000	78220000	chr9	78490000	78500000
chr9	rs79393974	T	G	chr9	111300000	111325000	chr9	110900000	110925000
chr9	rs871424	C	T	chr9	111300000	111325000	chr9	110900000	110925000
chr9	rs871424	C	T	chr9	111320000	111330000	chr9	110240000	110250000
chr9	rs871424	C	T	chr9	111320000	111330000	chr9	111040000	111050000
chr9	rs871424	C	T	chr9	111320000	111330000	chr9	111520000	111530000
chr9	rs871424	C	T	chr9	111325000	111330000	chr9	110240000	110245000
chr9	rs871424	C	T	chr9	111325000	111330000	chr9	110245000	110250000
chr9	rs871424	C	T	chr9	111325000	111350000	chr9	111700000	111725000
chr9	rs17727743	A	C	chr9	111300000	111325000	chr9	110900000	110925000
chr9	rs17727743	A	C	chr9	111320000	111330000	chr9	110240000	110250000
chr9	rs17727743	A	C	chr9	111320000	111330000	chr9	111040000	111050000
chr9	rs17727743	A	C	chr9	111320000	111330000	chr9	111520000	111530000
chr9	rs17727743	A	C	chr9	111325000	111330000	chr9	110240000	110245000
chr9	rs17727743	A	C	chr9	111325000	111330000	chr9	110245000	110250000
chr9	rs17727743	A	C	chr9	111325000	111350000	chr9	111700000	111725000
chr9	rs7859551	C	G	chr9	111300000	111325000	chr9	110900000	110925000
chr9	rs7859551	C	G	chr9	111320000	111330000	chr9	110240000	110250000
chr9	rs7859551	C	G	chr9	111320000	111330000	chr9	111040000	111050000
chr9	rs7859551	C	G	chr9	111320000	111330000	chr9	111520000	111530000
chr9	rs7859551	C	G	chr9	111325000	111330000	chr9	110240000	110245000
chr9	rs7859551	C	G	chr9	111325000	111330000	chr9	110245000	110250000
chr9	rs7859551	C	G	chr9	111325000	111350000	chr9	111700000	111725000
chr9	rs12337383	A	C	chr9	111320000	111330000	chr9	110240000	110250000
chr9	rs12337383	A	C	chr9	111320000	111330000	chr9	111040000	111050000
chr9	rs12337383	A	C	chr9	111320000	111330000	chr9	111520000	111530000
chr9	rs12337383	A	C	chr9	111325000	111330000	chr9	110240000	110245000
chr9	rs12337383	A	C	chr9	111325000	111330000	chr9	110245000	110250000
chr9	rs12337383	A	C	chr9	111325000	111350000	chr9	111700000	111725000
chr9	rs3860173	C	T	chr9	116440000	116450000	chr9	116640000	116650000
chr9	rs6478108	C	T	chr9	117560000	117570000	chr9	117500000	117510000
chr9	rs186553516	C	T	chr9	117560000	117570000	chr9	117500000	117510000
chr9	rs186553516	C	T	chr9	117565000	117570000	chr9	117655000	117660000
chr9	rs4880208	A	G	chr9	140000000	140025000	chr9	140125000	140150000
chr9	rs4880208	A	G	chr9	140010000	140020000	chr9	140090000	140100000
chr9	rs4880208	A	G	chr9	140010000	140020000	chr9	140130000	140140000
chr9	rs4880208	A	G	chr9	140010000	140020000	chr9	140420000	140430000
chr10	rs10906729	C	T	chr10	14690000	14700000	chr10	14640000	14650000
chr10	rs149626250	G	T	chr10	60250000	60275000	chr10	59925000	59950000
chr10	rs149626250	G	T	chr10	60270000	60280000	chr10	60060000	60070000
chr10	rs149626250	G	T	chr10	60275000	60300000	chr10	60525000	60550000
chr10	rs1875148	T	C	chr10	61340000	61350000	chr10	61000000	61010000
chr10	rs58600253	C	T	chr10	64500000	64505000	chr10	64395000	64400000
chr10	rs942793	T	G	chr10	81040000	81045000	chr10	81000000	81005000
chr10	rs942793	T	G	chr10	81045000	81050000	chr10	81005000	81010000
chr10	rs942793	T	G	chr10	81050000	81060000	chr10	81110000	81120000
chr10	rs111653077	C	T	chr10	119975000	120000000	chr10	119600000	119625000
chr10	rs111653077	C	T	chr10	119990000	120000000	chr10	119250000	119260000
chr10	rs10788068	T	C	chr10	122095000	122100000	chr10	121690000	121695000
chr10	rs10788068	T	C	chr10	122075000	122100000	chr10	121500000	121525000
chr10	rs10788068	T	C	chr10	122090000	122100000	chr10	121440000	121450000
chr10	rs10788068	T	C	chr10	122090000	122100000	chr10	121690000	121700000
chr10	rs10788068	T	C	chr10	122090000	122100000	chr10	121980000	121990000
chr11	rs7116974	G	A	chr11	32345000	32350000	chr11	32630000	32635000
chr11	rs7116974	G	A	chr11	32345000	32350000	chr11	32810000	32815000
chr11	rs7116974	G	A	chr11	32325000	32350000	chr11	32800000	32825000
chr11	rs7116974	G	A	chr11	32340000	32350000	chr11	32630000	32640000
chr11	rs7116974	G	A	chr11	32340000	32350000	chr11	32810000	32820000
chr11	rs7116974	G	A	chr11	32350000	32360000	chr11	32630000	32640000
chr11	rs148760906	G	A	chr11	32350000	32360000	chr11	32630000	32640000
chr11	rs11031728	C	G	chr11	32350000	32360000	chr11	32630000	32640000
chr11	rs2057178	G	A	chr11	32350000	32360000	chr11	32630000	32640000
chr11	rs538147	G	A	chr11	64130000	64140000	chr11	64410000	64420000
chr11	rs11820322	C	T	chr11	64410000	64420000	chr11	64130000	64140000
chr11	rs11820322	C	T	chr11	64410000	64420000	chr11	64320000	64330000
chr11	rs313411	A	G	chr11	103190000	103200000	chr11	103470000	103480000
chr11	rs313410	C	G	chr11	103190000	103200000	chr11	103470000	103480000
chr11	rs313409	A	G	chr11	103190000	103200000	chr11	103470000	103480000
chr11	rs220327	A	G	chr11	103190000	103200000	chr11	103470000	103480000
chr11	rs10791612	C	T	chr11	103190000	103200000	chr11	103470000	103480000
chr11	rs10791612	C	T	chr11	103200000	103225000	chr11	103450000	103475000
chr11	rs7948241	G	A	chr11	103190000	103200000	chr11	103470000	103480000
chr11	rs7948241	G	A	chr11	103200000	103225000	chr11	103450000	103475000
chr11	rs10895397	A	C	chr11	103190000	103200000	chr11	103470000	103480000
chr11	rs10895397	A	C	chr11	103200000	103225000	chr11	103450000	103475000
chr11	rs12577502	C	G	chr11	103190000	103200000	chr11	103470000	103480000
chr11	rs12577502	C	G	chr11	103200000	103225000	chr11	103450000	103475000
chr11	rs28638074	C	A	chr11	103190000	103200000	chr11	103470000	103480000
chr11	rs28638074	C	A	chr11	103200000	103225000	chr11	103450000	103475000
chr11	rs34915223	A	G	chr11	103190000	103200000	chr11	103470000	103480000
chr11	rs34915223	A	G	chr11	103200000	103225000	chr11	103450000	103475000
chr11	rs12271531	C	G	chr11	103190000	103200000	chr11	103470000	103480000
chr11	rs12271531	C	G	chr11	103200000	103225000	chr11	103450000	103475000
chr11	rs71480484	T	C	chr11	103190000	103200000	chr11	103470000	103480000
chr11	rs71480484	T	C	chr11	103200000	103225000	chr11	103450000	103475000
chr11	rs12799152	G	A	chr11	103200000	103225000	chr11	103450000	103475000
chr11	rs12806599	G	A	chr11	103200000	103225000	chr11	103450000	103475000
chr11	rs12800453	T	C	chr11	103200000	103225000	chr11	103450000	103475000
chr11	rs71480485	G	A	chr11	103200000	103225000	chr11	103450000	103475000
chr12	rs10772748	C	T	chr12	14375000	14400000	chr12	14575000	14600000
chr12	rs10772748	C	T	chr12	14375000	14400000	chr12	14750000	14775000
chr12	rs12424807	T	C	chr12	14390000	14395000	chr12	14515000	14520000
chr12	rs12424807	T	C	chr12	14390000	14400000	chr12	14770000	14780000
chr12	rs12424807	T	C	chr12	14375000	14400000	chr12	14575000	14600000
chr12	rs12424807	T	C	chr12	14375000	14400000	chr12	14750000	14775000
chr12	rs12424807	T	C	chr12	14400000	14425000	chr12	15100000	15125000
chr12	rs7487380	G	A	chr12	14390000	14400000	chr12	14770000	14780000
chr12	rs7487380	G	A	chr12	14375000	14400000	chr12	14575000	14600000
chr12	rs7487380	G	A	chr12	14375000	14400000	chr12	14750000	14775000
chr12	rs7487380	G	A	chr12	14400000	14425000	chr12	15100000	15125000
chr12	rs68027860	A	G	chr12	14390000	14400000	chr12	14770000	14780000
chr12	rs68027860	A	G	chr12	14375000	14400000	chr12	14575000	14600000
chr12	rs68027860	A	G	chr12	14375000	14400000	chr12	14750000	14775000
chr12	rs68027860	A	G	chr12	14400000	14425000	chr12	15100000	15125000
chr12	rs36108061	C	G	chr12	14410000	14415000	chr12	14520000	14525000
chr12	rs36108061	C	G	chr12	14400000	14425000	chr12	15100000	15125000
chr12	rs36108061	C	G	chr12	14410000	14420000	chr12	14510000	14520000
chr12	rs55901548	A	G	chr12	14410000	14415000	chr12	14520000	14525000
chr12	rs55901548	A	G	chr12	14400000	14425000	chr12	15100000	15125000
chr12	rs55901548	A	G	chr12	14410000	14420000	chr12	14510000	14520000
chr12	rs12425125	C	T	chr12	14410000	14415000	chr12	14520000	14525000
chr12	rs12425125	C	T	chr12	14400000	14425000	chr12	15100000	15125000
chr12	rs12425125	C	T	chr12	14410000	14420000	chr12	14510000	14520000
chr12	rs12422836	G	C	chr12	14410000	14415000	chr12	14520000	14525000
chr12	rs12422836	G	C	chr12	14400000	14425000	chr12	15100000	15125000
chr12	rs12422836	G	C	chr12	14410000	14420000	chr12	14510000	14520000
chr12	rs12426892	A	G	chr12	14410000	14415000	chr12	14520000	14525000
chr12	rs12426892	A	G	chr12	14400000	14425000	chr12	15100000	15125000
chr12	rs12426892	A	G	chr12	14410000	14420000	chr12	14510000	14520000
chr12	rs12425560	C	G	chr12	14410000	14415000	chr12	14520000	14525000
chr12	rs12425560	C	G	chr12	14400000	14425000	chr12	15100000	15125000
chr12	rs12425560	C	G	chr12	14410000	14420000	chr12	14510000	14520000
chr12	rs35996811	G	A	chr12	14410000	14415000	chr12	14520000	14525000
chr12	rs35996811	G	A	chr12	14400000	14425000	chr12	15100000	15125000
chr12	rs35996811	G	A	chr12	14410000	14420000	chr12	14510000	14520000
chr12	rs12423242	G	C	chr12	14410000	14415000	chr12	14520000	14525000
chr12	rs12423242	G	C	chr12	14400000	14425000	chr12	15100000	15125000
chr12	rs12423242	G	C	chr12	14410000	14420000	chr12	14510000	14520000
chr12	rs34737341	C	G	chr12	14410000	14415000	chr12	14520000	14525000
chr12	rs34737341	C	G	chr12	14400000	14425000	chr12	15100000	15125000
chr12	rs34737341	C	G	chr12	14410000	14420000	chr12	14510000	14520000
chr12	rs34246472	G	A	chr12	14410000	14415000	chr12	14520000	14525000
chr12	rs34246472	G	A	chr12	14400000	14425000	chr12	15100000	15125000
chr12	rs34246472	G	A	chr12	14410000	14420000	chr12	14510000	14520000
chr12	rs35883625	A	G	chr12	14410000	14415000	chr12	14520000	14525000
chr12	rs35883625	A	G	chr12	14400000	14425000	chr12	15100000	15125000
chr12	rs35883625	A	G	chr12	14410000	14420000	chr12	14510000	14520000
chr12	rs12831867	C	G	chr12	14410000	14415000	chr12	14520000	14525000
chr12	rs12831867	C	G	chr12	14400000	14425000	chr12	15100000	15125000
chr12	rs12831867	C	G	chr12	14410000	14420000	chr12	14510000	14520000
chr12	rs34991620	C	T	chr12	14410000	14415000	chr12	14520000	14525000
chr12	rs34991620	C	T	chr12	14400000	14425000	chr12	15100000	15125000
chr12	rs34991620	C	T	chr12	14410000	14420000	chr12	14510000	14520000
chr12	rs35747749	T	C	chr12	14410000	14415000	chr12	14520000	14525000
chr12	rs35747749	T	C	chr12	14400000	14425000	chr12	15100000	15125000
chr12	rs35747749	T	C	chr12	14410000	14420000	chr12	14510000	14520000
chr12	rs34152332	T	C	chr12	14400000	14425000	chr12	15100000	15125000
chr12	rs34152332	T	C	chr12	14410000	14420000	chr12	14510000	14520000
chr12	rs35429574	G	T	chr12	14400000	14425000	chr12	15100000	15125000
chr12	rs35429574	G	T	chr12	14410000	14420000	chr12	14510000	14520000
chr12	rs35849943	A	C	chr12	14400000	14425000	chr12	15100000	15125000
chr12	rs35849943	A	C	chr12	14410000	14420000	chr12	14510000	14520000
chr12	rs9919696	A	G	chr12	14400000	14425000	chr12	15100000	15125000
chr12	rs9919696	A	G	chr12	14410000	14420000	chr12	14510000	14520000
chr12	rs9919817	C	T	chr12	14400000	14425000	chr12	15100000	15125000
chr12	rs9919817	C	T	chr12	14410000	14420000	chr12	14510000	14520000
chr12	rs1490696	C	T	chr12	19010000	19020000	chr12	19330000	19340000
chr12	rs1873613	T	C	chr12	40540000	40550000	chr12	41310000	41320000
chr12	rs1873613	T	C	chr12	40545000	40550000	chr12	40615000	40620000
chr12	rs1873613	T	C	chr12	40545000	40550000	chr12	40705000	40710000
chr12	rs1873613	T	C	chr12	40525000	40550000	chr12	41000000	41025000
chr12	rs1873613	T	C	chr12	40525000	40550000	chr12	41300000	41325000
chr12	rs1873613	T	C	chr12	40550000	40555000	chr12	40595000	40600000
chr12	rs11175593	C	T	chr12	40595000	40600000	chr12	40550000	40555000
chr12	rs4898532	T	C	chr12	50220000	50225000	chr12	50175000	50180000
chr12	rs11613959	A	G	chr12	52525000	52550000	chr12	53250000	53275000
chr12	rs11613959	A	G	chr12	52540000	52550000	chr12	52720000	52730000
chr12	rs79397834	T	C	chr12	52525000	52550000	chr12	53250000	53275000
chr12	rs79397834	T	C	chr12	52540000	52550000	chr12	52720000	52730000
chr12	rs74535216	C	A	chr12	52525000	52550000	chr12	53250000	53275000
chr12	rs74535216	C	A	chr12	52540000	52550000	chr12	52720000	52730000
chr12	rs74383437	T	G	chr12	52525000	52550000	chr12	53250000	53275000
chr12	rs74383437	T	G	chr12	52540000	52550000	chr12	52720000	52730000
chr12	rs200495162	G	A	chr12	52550000	52555000	chr12	52720000	52725000
chr12	rs200495162	G	A	chr12	52525000	52550000	chr12	53250000	53275000
chr12	rs200495162	G	A	chr12	52540000	52550000	chr12	52720000	52730000
chr12	rs200495162	G	A	chr12	52550000	52575000	chr12	52725000	52750000
chr12	rs200495162	G	A	chr12	52550000	52560000	chr12	52970000	52980000
chr12	rs200495162	G	A	chr12	52550000	52575000	chr12	53250000	53275000
chr12	rs200495162	G	A	chr12	52550000	52560000	chr12	53270000	53280000
chr12	rs74539234	C	T	chr12	52550000	52555000	chr12	52720000	52725000
chr12	rs74539234	C	T	chr12	52525000	52550000	chr12	53250000	53275000
chr12	rs74539234	C	T	chr12	52540000	52550000	chr12	52720000	52730000
chr12	rs74539234	C	T	chr12	52550000	52575000	chr12	52725000	52750000
chr12	rs74539234	C	T	chr12	52550000	52560000	chr12	52970000	52980000
chr12	rs74539234	C	T	chr12	52550000	52575000	chr12	53250000	53275000
chr12	rs74539234	C	T	chr12	52550000	52560000	chr12	53270000	53280000
chr12	rs74099453	T	G	chr12	69265000	69270000	chr12	69460000	69465000
chr12	rs74099453	T	G	chr12	69250000	69260000	chr12	69460000	69470000
chr12	rs74099453	T	G	chr12	69250000	69260000	chr12	69640000	69650000
chr12	rs74099453	T	G	chr12	69255000	69260000	chr12	69460000	69465000
chr12	rs74099453	T	G	chr12	69255000	69260000	chr12	69645000	69650000
chr12	rs2291693	A	G	chr12	69265000	69270000	chr12	69460000	69465000
chr12	rs2291693	A	G	chr12	69250000	69260000	chr12	69460000	69470000
chr12	rs2291693	A	G	chr12	69250000	69260000	chr12	69640000	69650000
chr12	rs2291693	A	G	chr12	69255000	69260000	chr12	69460000	69465000
chr12	rs2291693	A	G	chr12	69255000	69260000	chr12	69645000	69650000
chr12	rs58899020	C	T	chr12	69265000	69270000	chr12	69460000	69465000
chr12	rs58899020	C	T	chr12	69250000	69260000	chr12	69460000	69470000
chr12	rs58899020	C	T	chr12	69250000	69260000	chr12	69640000	69650000
chr12	rs58899020	C	T	chr12	69255000	69260000	chr12	69460000	69465000
chr12	rs58899020	C	T	chr12	69255000	69260000	chr12	69645000	69650000
chr12	rs2293637	C	G	chr12	69265000	69270000	chr12	69460000	69465000
chr12	rs11830962	T	G	chr12	69265000	69270000	chr12	69460000	69465000
chr12	rs11837874	G	A	chr12	69265000	69270000	chr12	69460000	69465000
chr12	rs11837875	G	T	chr12	69265000	69270000	chr12	69460000	69465000
chr12	rs11837841	C	T	chr12	69265000	69270000	chr12	69460000	69465000
chr12	rs1144952	T	C	chr12	69265000	69270000	chr12	69460000	69465000
chr12	rs11837900	G	T	chr12	69265000	69270000	chr12	69460000	69465000
chr12	rs11837881	C	T	chr12	69265000	69270000	chr12	69460000	69465000
chr12	rs11831045	T	C	chr12	69265000	69270000	chr12	69460000	69465000
chr12	rs4631967	A	T	chr12	69265000	69270000	chr12	69460000	69465000
chr12	rs4359283	G	T	chr12	69265000	69270000	chr12	69460000	69465000
chr12	rs4460888	A	G	chr12	69265000	69270000	chr12	69460000	69465000
chr12	rs4506728	C	T	chr12	69265000	69270000	chr12	69460000	69465000
chr12	rs111880665	T	C	chr12	69265000	69270000	chr12	69460000	69465000
chr12	rs111843593	G	C	chr12	69265000	69270000	chr12	69460000	69465000
chr12	rs111344384	T	C	chr12	69265000	69270000	chr12	69460000	69465000
chr12	rs112871145	G	A	chr12	69265000	69270000	chr12	69460000	69465000
chr12	rs111847104	A	G	chr12	69265000	69270000	chr12	69460000	69465000
chr12	rs61642036	C	A	chr12	69265000	69270000	chr12	69460000	69465000
chr12	rs1629426	C	A	chr12	69265000	69270000	chr12	69460000	69465000
chr12	rs1795475	T	G	chr12	69265000	69270000	chr12	69460000	69465000
chr12	rs1795476	C	T	chr12	69265000	69270000	chr12	69460000	69465000
chr12	rs1663580	C	A	chr12	69265000	69270000	chr12	69460000	69465000
chr12	rs74099458	C	G	chr12	69265000	69270000	chr12	69460000	69465000
chr12	rs57202226	C	T	chr12	69265000	69270000	chr12	69460000	69465000
chr13	rs12867751	T	C	chr13	28375000	28400000	chr13	28100000	28125000
chr13	rs60601341	G	C	chr13	28600000	28625000	chr13	28825000	28850000
chr13	rs9533634	T	C	chr13	44375000	44400000	chr13	43150000	43175000
chr13	rs9533634	T	C	chr13	44375000	44400000	chr13	43525000	43550000
chr13	rs9533634	T	C	chr13	44375000	44400000	chr13	43650000	43675000
chr13	rs3764147	A	G	chr13	44450000	44460000	chr13	43560000	43570000
chr13	rs189332232	C	T	chr13	44450000	44460000	chr13	43560000	43570000
chr13	rs73175542	G	A	chr13	47450000	47475000	chr13	48025000	48050000
chr13	rs1323565	A	G	chr13	76450000	76455000	chr13	77045000	77050000
chr13	rs1323565	A	G	chr13	76425000	76450000	chr13	76250000	76275000
chr13	rs1323565	A	G	chr13	76440000	76450000	chr13	77050000	77060000
chr13	rs1323565	A	G	chr13	76440000	76450000	chr13	77570000	77580000
chr13	rs1323565	A	G	chr13	76445000	76450000	chr13	77475000	77480000
chr13	rs9544058	T	C	chr13	76450000	76455000	chr13	77045000	77050000
chr13	rs9544058	T	C	chr13	76425000	76450000	chr13	76250000	76275000
chr13	rs9544058	T	C	chr13	76440000	76450000	chr13	77050000	77060000
chr13	rs9544058	T	C	chr13	76440000	76450000	chr13	77570000	77580000
chr13	rs9544058	T	C	chr13	76445000	76450000	chr13	77475000	77480000
chr13	rs1323566	A	G	chr13	76450000	76455000	chr13	77045000	77050000
chr13	rs1323566	A	G	chr13	76425000	76450000	chr13	76250000	76275000
chr13	rs1323566	A	G	chr13	76440000	76450000	chr13	77050000	77060000
chr13	rs1323566	A	G	chr13	76440000	76450000	chr13	77570000	77580000
chr13	rs1323566	A	G	chr13	76445000	76450000	chr13	77475000	77480000
chr14	rs7159402	C	T	chr14	37410000	37420000	chr14	37020000	37030000
chr14	rs7159402	C	T	chr14	37410000	37415000	chr14	37615000	37620000
chr14	rs12896722	G	T	chr14	37410000	37420000	chr14	37020000	37030000
chr14	rs12896722	G	T	chr14	37410000	37415000	chr14	37615000	37620000
chr14	rs1367031	T	C	chr14	37410000	37420000	chr14	37020000	37030000
chr14	rs1367031	T	C	chr14	37410000	37415000	chr14	37615000	37620000
chr14	rs10149290	A	T	chr14	37410000	37420000	chr14	37020000	37030000
chr14	rs10149290	A	T	chr14	37410000	37415000	chr14	37615000	37620000
chr14	rs12878657	G	A	chr14	37410000	37420000	chr14	37020000	37030000
chr14	rs12878657	G	A	chr14	37410000	37415000	chr14	37615000	37620000
chr14	rs7143097	T	G	chr14	37410000	37420000	chr14	37020000	37030000
chr14	rs7143097	T	G	chr14	37410000	37415000	chr14	37615000	37620000
chr14	rs2022722	T	C	chr14	37410000	37420000	chr14	37020000	37030000
chr14	rs8017518	T	C	chr14	37410000	37420000	chr14	37020000	37030000
chr14	rs9323270	C	A	chr14	55235000	55240000	chr14	55030000	55035000
chr14	rs9323270	C	A	chr14	55240000	55245000	chr14	55030000	55035000
chr14	rs9323270	C	A	chr14	55225000	55250000	chr14	54825000	54850000
chr14	rs9323270	C	A	chr14	55240000	55250000	chr14	55190000	55200000
chr14	rs9323271	C	G	chr14	55235000	55240000	chr14	55030000	55035000
chr14	rs9323271	C	G	chr14	55240000	55245000	chr14	55030000	55035000
chr14	rs9323271	C	G	chr14	55225000	55250000	chr14	54825000	54850000
chr14	rs9323271	C	G	chr14	55240000	55250000	chr14	55190000	55200000
chr14	rs77432698	A	G	chr14	68050000	68055000	chr14	68130000	68135000
chr14	rs77432698	A	G	chr14	68050000	68060000	chr14	68170000	68180000
chr14	rs12437118	G	A	chr14	76980000	76990000	chr14	77110000	77120000
chr14	rs7150626	C	T	chr14	90850000	90860000	chr14	90420000	90430000
chr14	rs7150626	C	T	chr14	90860000	90870000	chr14	91220000	91230000
chr14	rs11624680	G	A	chr14	96030000	96040000	chr14	96460000	96470000
chr14	rs11624680	G	A	chr14	96000000	96025000	chr14	96725000	96750000
chr14	rs11624680	G	A	chr14	96020000	96030000	chr14	96460000	96470000
chr14	rs11624680	G	A	chr14	96025000	96030000	chr14	96460000	96465000
chr14	rs8005962	C	T	chr14	96030000	96040000	chr14	96460000	96470000
chr14	rs8005962	C	T	chr14	96000000	96025000	chr14	96725000	96750000
chr14	rs8005962	C	T	chr14	96020000	96030000	chr14	96460000	96470000
chr14	rs8005962	C	T	chr14	96025000	96030000	chr14	96460000	96465000
chr14	rs2887395	G	A	chr14	96030000	96040000	chr14	96460000	96470000
chr14	rs2887395	G	A	chr14	96000000	96025000	chr14	96725000	96750000
chr14	rs2887395	G	A	chr14	96020000	96030000	chr14	96460000	96470000
chr14	rs2887395	G	A	chr14	96025000	96030000	chr14	96460000	96465000
chr14	rs2369019	G	A	chr14	96030000	96040000	chr14	96460000	96470000
chr14	rs2369019	G	A	chr14	96000000	96025000	chr14	96725000	96750000
chr14	rs2369019	G	A	chr14	96020000	96030000	chr14	96460000	96470000
chr14	rs2369019	G	A	chr14	96025000	96030000	chr14	96460000	96465000
chr14	rs7152619	T	C	chr14	96030000	96040000	chr14	96460000	96470000
chr14	rs7152619	T	C	chr14	96020000	96030000	chr14	96460000	96470000
chr14	rs7152619	T	C	chr14	96025000	96030000	chr14	96460000	96465000
chr14	rs8014367	C	T	chr14	96030000	96040000	chr14	96460000	96470000
chr14	rs8014367	C	T	chr14	96020000	96030000	chr14	96460000	96470000
chr14	rs8014367	C	T	chr14	96025000	96030000	chr14	96460000	96465000
chr14	rs9323929	C	T	chr14	96030000	96040000	chr14	96460000	96470000
chr14	rs9323929	C	T	chr14	96020000	96030000	chr14	96460000	96470000
chr14	rs9323929	C	T	chr14	96025000	96030000	chr14	96460000	96465000
chr15	rs77979355	G	A	chr15	75060000	75070000	chr15	74660000	74670000
chr15	rs77979355	G	A	chr15	75060000	75070000	chr15	74920000	74930000
chr15	rs77979355	G	A	chr15	75050000	75075000	chr15	74650000	74675000
chr15	rs77979355	G	A	chr15	75050000	75075000	chr15	75225000	75250000
chr15	rs114416857	G	A	chr15	101745000	101750000	chr15	101710000	101715000
chr15	rs114416857	G	A	chr15	101745000	101750000	chr15	101780000	101785000
chr16	rs116282608	T	G	chr16	225000	230000	chr16	155000	160000
chr16	rs17326812	A	T	chr16	19615000	19620000	chr16	19895000	19900000
chr16	rs17326812	A	T	chr16	19600000	19625000	chr16	20375000	20400000
chr16	rs150404587	G	A	chr16	19615000	19620000	chr16	19895000	19900000
chr16	rs150404587	G	A	chr16	19600000	19625000	chr16	20375000	20400000
chr16	rs75199663	G	A	chr16	19615000	19620000	chr16	19895000	19900000
chr16	rs75199663	G	A	chr16	19600000	19625000	chr16	20375000	20400000
chr16	rs8056025	G	C	chr16	19600000	19625000	chr16	20375000	20400000
chr16	rs16972263	A	G	chr16	19600000	19625000	chr16	20375000	20400000
chr16	rs16948876	G	A	chr16	50825000	50850000	chr16	52000000	52025000
chr16	rs16948876	G	A	chr16	50850000	50875000	chr16	51775000	51800000
chr16	rs173539	C	T	chr16	56975000	57000000	chr16	57200000	57225000
chr16	rs173539	C	T	chr16	56990000	57000000	chr16	57200000	57210000
chr16	rs3764261	C	A	chr16	56975000	57000000	chr16	57200000	57225000
chr16	rs3764261	C	A	chr16	56990000	57000000	chr16	57200000	57210000
chr16	rs3764261	C	A	chr16	56995000	57000000	chr16	57200000	57205000
chr16	rs188872	A	G	chr16	57445000	57450000	chr16	57335000	57340000
chr16	rs188872	A	G	chr16	57450000	57460000	chr16	57550000	57560000
chr16	rs188872	A	G	chr16	57455000	57460000	chr16	57335000	57340000
chr16	rs1687658	T	C	chr16	86415000	86420000	chr16	86375000	86380000
chr16	rs1728407	A	G	chr16	86415000	86420000	chr16	86375000	86380000
chr17	rs8082190	C	T	chr17	35725000	35750000	chr17	34950000	34975000
chr17	rs1867164	A	G	chr17	54550000	54575000	chr17	53600000	53625000
chr17	rs1867164	A	G	chr17	54550000	54575000	chr17	54075000	54100000
chr17	rs1867164	A	G	chr17	54550000	54560000	chr17	54200000	54210000
chr17	rs1867164	A	G	chr17	54550000	54575000	chr17	54200000	54225000
chr17	rs9901739	C	A	chr17	54550000	54575000	chr17	53600000	53625000
chr17	rs9901739	C	A	chr17	54550000	54575000	chr17	54075000	54100000
chr17	rs9901739	C	A	chr17	54550000	54560000	chr17	54200000	54210000
chr17	rs9901739	C	A	chr17	54550000	54575000	chr17	54200000	54225000
chr18	rs144095996	C	T	chr18	5450000	5460000	chr18	5540000	5550000
chr18	rs144095996	C	T	chr18	5450000	5475000	chr18	5800000	5825000
chr18	rs35687920	G	A	chr18	20140000	20150000	chr18	19490000	19500000
chr18	rs35687920	G	A	chr18	20140000	20150000	chr18	19740000	19750000
chr18	rs35687920	G	A	chr18	20140000	20150000	chr18	19750000	19760000
chr18	rs35687920	G	A	chr18	20125000	20150000	chr18	19575000	19600000
chr18	rs8087640	T	G	chr18	46000000	46010000	chr18	46470000	46480000
chr18	rs8087640	T	G	chr18	46000000	46025000	chr18	46750000	46775000
chr18	rs8087640	T	G	chr18	46000000	46010000	chr18	46970000	46980000
chr18	rs8087640	T	G	chr18	46000000	46025000	chr18	47375000	47400000
chr18	rs8087640	T	G	chr18	46000000	46010000	chr18	47380000	47390000
chr18	rs8087640	T	G	chr18	46005000	46010000	chr18	46970000	46975000
chr18	rs486117	G	A	chr18	55825000	55850000	chr18	54400000	54425000
chr18	rs3937015	T	C	chr18	67600000	67625000	chr18	66500000	66525000
chr18	rs3937015	T	C	chr18	67600000	67625000	chr18	68100000	68125000
chr18	rs12970649	C	T	chr18	67600000	67625000	chr18	66500000	66525000
chr18	rs12970649	C	T	chr18	67600000	67625000	chr18	68100000	68125000
chr20	rs6079180	A	G	chr20	13790000	13800000	chr20	14030000	14040000
chr20	rs6046764	C	T	chr20	20225000	20250000	chr20	20325000	20350000
chr20	rs1999546	G	A	chr20	46350000	46375000	chr20	46625000	46650000
chr20	rs1999546	G	A	chr20	46350000	46375000	chr20	47225000	47250000
chr20	rs1999546	G	A	chr20	46375000	46400000	chr20	47525000	47550000
chr21	rs12482329	T	C	chr21	16225000	16250000	chr21	15775000	15800000
chr21	rs12482329	T	C	chr21	16225000	16250000	chr21	16575000	16600000
chr21	rs12482329	T	C	chr21	16230000	16240000	chr21	16430000	16440000
chr21	rs12482329	T	C	chr21	16235000	16240000	chr21	16855000	16860000
chr21	rs11701827	G	A	chr21	34290000	34300000	chr21	34560000	34570000
chr21	rs11701827	G	A	chr21	34300000	34325000	chr21	34800000	34825000
chr21	rs73198439	C	T	chr21	34310000	34315000	chr21	34500000	34505000
chr21	rs73198439	C	T	chr21	34310000	34320000	chr21	34560000	34570000
chr21	rs73198439	C	T	chr21	34300000	34325000	chr21	34800000	34825000
chr21	rs73198441	A	G	chr21	34310000	34315000	chr21	34500000	34505000
chr21	rs73198441	A	G	chr21	34310000	34320000	chr21	34560000	34570000
chr21	rs73198441	A	G	chr21	34300000	34325000	chr21	34800000	34825000
chr21	rs73198442	A	C	chr21	34310000	34315000	chr21	34500000	34505000
chr21	rs73198442	A	C	chr21	34310000	34320000	chr21	34560000	34570000
chr21	rs73198442	A	C	chr21	34300000	34325000	chr21	34800000	34825000
chr21	rs11702172	G	A	chr21	34310000	34315000	chr21	34500000	34505000
chr21	rs11702172	G	A	chr21	34310000	34320000	chr21	34560000	34570000
chr21	rs11702172	G	A	chr21	34300000	34325000	chr21	34800000	34825000
chr21	rs2105476	G	C	chr21	34310000	34315000	chr21	34500000	34505000
chr21	rs2105476	G	C	chr21	34310000	34320000	chr21	34560000	34570000
chr21	rs2105476	G	C	chr21	34300000	34325000	chr21	34800000	34825000
chr21	rs8128655	T	G	chr21	34310000	34320000	chr21	34560000	34570000
chr21	rs8128655	T	G	chr21	34300000	34325000	chr21	34800000	34825000
chr21	rs2834026	C	T	chr21	34310000	34320000	chr21	34560000	34570000
chr21	rs2834026	C	T	chr21	34300000	34325000	chr21	34800000	34825000
chr21	rs2838519	G	A	chr21	45620000	45630000	chr21	45570000	45580000
chr21	rs2838519	G	A	chr21	45610000	45615000	chr21	45575000	45580000
chr22	rs738727	G	A	chr22	47150000	47160000	chr22	46980000	46990000

## Sheet: gwas catalog SNP with loop
Table3. GWAS-catalog significant SNP overlapped with Hi-C loop
chr1	rs4240897	G	A	.	-1	-1	.	.	.
chr1	rs1925714	A	G	.	-1	-1	.	.	.
chr1	rs6676375	T	C	.	-1	-1	.	.	.
chr2	rs1075309	C	T	.	-1	-1	.	.	.
chr2	rs6545883	A	G	chr2	61760000	61770000	chr2	61880000	61890000
chr2	rs2335704	C	A	.	-1	-1	.	.	.
chr3	rs2202157	C	T	.	-1	-1	.	.	.
chr4	rs2269497	A	G	chr4	3430000	3440000	chr4	3350000	3360000
chr4	rs2939731	A	G	chr4	37600000	37605000	chr4	37800000	37805000
chr4	rs2939731	A	G	chr4	37600000	37625000	chr4	38025000	38050000
chr4	rs2940989	G	A	chr4	37600000	37605000	chr4	37800000	37805000
chr4	rs2940989	G	A	chr4	37600000	37625000	chr4	38025000	38050000
chr4	rs2940991	C	T	chr4	37600000	37605000	chr4	37800000	37805000
chr4	rs2940991	C	T	chr4	37600000	37625000	chr4	38025000	38050000
chr4	rs958617	A	G	chr4	78610000	78620000	chr4	78290000	78300000
chr4	rs10005603	T	G	chr4	105845000	105850000	chr4	106390000	106395000
chr4	rs10005603	T	G	chr4	105825000	105850000	chr4	106375000	106400000
chr4	rs10005603	T	G	chr4	105840000	105850000	chr4	106390000	106400000
chr5	rs2894967	G	A	.	-1	-1	.	.	.
chr5	rs931924	C	T	.	-1	-1	.	.	.
chr5	rs11958933	G	A	.	-1	-1	.	.	.
chr5	rs17410035	G	T	.	-1	-1	.	.	.
chr5	rs1501847	T	C	.	-1	-1	.	.	.
chr5	rs11960504	C	T	.	-1	-1	.	.	.
chr6	rs2505675	C	T	chr6	2350000	2360000	chr6	1600000	1610000
chr6	rs41553512	C	T	.	-1	-1	.	.	.
chr6	rs28802989	C	G	chr6	32610000	32620000	chr6	45660000	45670000
chr6	rs28802989	C	G	chr6	32600000	32625000	chr6	45650000	45675000
chr6	rs9373523	T	G	chr6	147700000	147725000	chr6	148475000	148500000
chr6	rs9365798	C	T	.	-1	-1	.	.	.
chr7	rs916943	C	T	.	-1	-1	.	.	.
chr7	rs2665441	A	G	.	-1	-1	.	.	.
chr7	rs7787531	C	T	chr7	129010000	129020000	chr7	129280000	129290000
chr7	rs7787531	C	T	chr7	129000000	129025000	chr7	129450000	129475000
chr8	rs7821565	T	C	.	-1	-1	.	.	.
chr8	rs160441	T	C	.	-1	-1	.	.	.
chr8	rs17217757	G	C	.	-1	-1	.	.	.
chr8	rs4733781	A	C	chr8	131290000	131300000	chr8	131340000	131350000
chr8	rs4733781	A	C	chr8	131290000	131295000	chr8	131365000	131370000
chr8	rs4733781	A	C	chr8	131290000	131295000	chr8	131450000	131455000
chr8	rs4733781	A	C	chr8	131290000	131300000	chr8	131450000	131460000
chr8	rs4733781	A	C	chr8	131290000	131300000	chr8	131340000	131350000
chr8	rs4733781	A	C	chr8	131290000	131295000	chr8	131365000	131370000
chr8	rs4733781	A	C	chr8	131290000	131295000	chr8	131450000	131455000
chr8	rs4733781	A	C	chr8	131290000	131300000	chr8	131450000	131460000
chr9	rs586716	G	A	.	-1	-1	.	.	.
chr9	rs1662230	T	G	.	-1	-1	.	.	.
chr9	rs1854330	A	G	chr9	78210000	78220000	chr9	78490000	78500000
chr9	rs751303	C	G	.	-1	-1	.	.	.
chr9	rs10869606	G	C	.	-1	-1	.	.	.
chr9	rs11525994	G	A	.	-1	-1	.	.	.
chr9	rs10819610	G	T	chr9	132940000	132950000	chr9	132870000	132880000
chr9	rs10819610	G	T	chr9	132945000	132950000	chr9	132990000	132995000
chr10	rs1417569	G	A	.	-1	-1	.	.	.
chr10	rs1934954	T	C	.	-1	-1	.	.	.
chr11	rs1819084	C	A	chr11	13975000	14000000	chr11	13775000	13800000
chr11	rs1819084	C	A	chr11	13975000	14000000	chr11	14150000	14175000
chr11	rs1819084	C	A	chr11	13975000	14000000	chr11	14450000	14475000
chr11	rs2057178	G	A	chr11	32350000	32360000	chr11	32630000	32640000
chr11	rs2057178	G	A	chr11	32350000	32360000	chr11	32630000	32640000
chr11	rs2057178	G	A	chr11	32350000	32360000	chr11	32630000	32640000
chr11	rs7947821	T	C	chr11	102950000	102975000	chr11	102175000	102200000
chr11	rs12283022	A	G	.	-1	-1	.	.	.
chr11	rs12294076	T	C	.	-1	-1	.	.	.
chr12	rs6538140	G	A	.	-1	-1	.	.	.
chr12	rs199911028	A	G	chr12	96950000	96975000	chr12	98375000	98400000
chr12	rs199911028	A	G	chr12	96950000	96975000	chr12	98775000	98800000
chr12	rs199911028	A	G	chr12	96950000	96975000	chr12	98925000	98950000
chr13	rs1900442	T	C	.	-1	-1	.	.	.
chr14	rs8016621	G	A	.	-1	-1	.	.	.
chr14	rs17175227	G	A	chr14	70495000	70500000	chr14	70285000	70290000
chr14	rs17175227	G	A	chr14	70475000	70500000	chr14	70025000	70050000
chr14	rs17175227	G	A	chr14	70500000	70525000	chr14	71025000	71050000
chr14	rs7152005	C	T	.	-1	-1	.	.	.
chr14	rs12437118	G	A	chr14	76980000	76990000	chr14	77110000	77120000
chr14	rs8005962	C	T	chr14	96030000	96040000	chr14	96460000	96470000
chr14	rs8005962	C	T	chr14	96000000	96025000	chr14	96725000	96750000
chr14	rs8005962	C	T	chr14	96020000	96030000	chr14	96460000	96470000
chr14	rs8005962	C	T	chr14	96025000	96030000	chr14	96460000	96465000
chr14	rs6575836	G	A	.	-1	-1	.	.	.
chr15	rs142644068	T	C	.	-1	-1	.	.	.
chr16	rs40363	G	A	.	-1	-1	.	.	.
chr16	rs1948632	G	A	.	-1	-1	.	.	.
chr16	rs12386026	C	T	.	-1	-1	.	.	.
chr17	rs712039	C	T	.	-1	-1	.	.	.
chr18	rs4331426	G	A	.	-1	-1	.	.	.
chr18	rs4331426	G	A	.	-1	-1	.	.	.
chr18	rs4257308	C	T	.	-1	-1	.	.	.
chr19	rs1434579	C	T	.	-1	-1	.	.	.
chr20	rs6114027	T	C	.	-1	-1	.	.	.
chr21	rs2150367	G	T	.	-1	-1	.	.	.
chr21	rs11702781	C	T	.	-1	-1	.	.	.
chr21	rs2837857	C	T	.	-1	-1	.	.	.
chr21	rs451390	G	C	.	-1	-1	.	.	.
chr22	rs3218255	G	A	.	-1	-1	.	.	.
chrX	rs5928363	A	T	.	-1	-1	.	.	.
chrX	rs142513793	C	T	.	-1	-1	.	.	.
chrX	rs139956886	C	T	.	-1	-1	.	.	.

## Sheet: uk biobank SNP with loop
Table4. Ukbiobank significant SNP overlapped with Hi-C loop
chr1	rs581742	C	T	.	-1	-1	.	.	.
chr1	rs594797	T	C	.	-1	-1	.	.	.
chr1	rs6540574	G	A	chr1	206900000	206905000	chr1	207080000	207085000
chr1	rs6540574	G	A	chr1	206890000	206900000	chr1	206800000	206810000
chr1	rs11120194	T	C	.	-1	-1	.	.	.
chr4	rs35219078	A	G	.	-1	-1	.	.	.
chr4	rs11932461	C	G	.	-1	-1	.	.	.
chr4	rs6838551	G	T	.	-1	-1	.	.	.
chr4	rs6847117	C	T	.	-1	-1	.	.	.
chr7	rs189804851	A	T	.	-1	-1	.	.	.
chr7	rs117698752	C	T	chr7	78910000	78920000	chr7	79660000	79670000
chr7	rs117698752	C	T	chr7	78900000	78925000	chr7	79625000	79650000
chr8	rs56945296	G	T	.	-1	-1	.	.	.
chr8	rs13256021	T	C	.	-1	-1	.	.	.
chr10	rs1468069	A	C	chr10	98980000	98985000	chr10	98830000	98835000
chr10	rs1468069	A	C	chr10	98990000	99000000	chr10	98830000	98840000
chr10	rs1468069	A	C	chr10	98990000	98995000	chr10	98835000	98840000
chr10	rs2297987	A	G	chr10	98980000	98985000	chr10	98830000	98835000
chr10	rs2297987	A	G	chr10	98990000	99000000	chr10	98830000	98840000
chr10	rs2297987	A	G	chr10	98990000	98995000	chr10	98835000	98840000
chr10	rs11189052	A	T	chr10	98990000	99000000	chr10	98830000	98840000
chr10	rs11189052	A	T	chr10	98990000	98995000	chr10	98835000	98840000
chr10	rs8181326	G	A	chr10	98990000	99000000	chr10	98830000	98840000
chr10	rs8181326	G	A	chr10	98990000	98995000	chr10	98835000	98840000
chr10	rs11189058	G	A	chr10	98990000	99000000	chr10	98830000	98840000
chr10	rs11595634	A	T	chr10	98990000	99000000	chr10	98830000	98840000
chr10	rs3818908	A	G	.	-1	-1	.	.	.
chr10	rs10786336	A	C	.	-1	-1	.	.	.
chr10	rs10882908	T	C	.	-1	-1	.	.	.
chr10	rs11189172	T	C	.	-1	-1	.	.	.
chr10	rs7084654	G	A	.	-1	-1	.	.	.
chr10	rs7088410	G	T	.	-1	-1	.	.	.
chr10	rs12359257	A	T	.	-1	-1	.	.	.
chr10	rs12258560	T	C	.	-1	-1	.	.	.
chr10	rs4635018	G	C	.	-1	-1	.	.	.
chr10	rs10882909	G	C	.	-1	-1	.	.	.
chr10	rs10882910	G	A	.	-1	-1	.	.	.
chr10	rs10882911	A	C	.	-1	-1	.	.	.
chr10	rs10882912	C	T	.	-1	-1	.	.	.
chr10	rs11189174	C	G	.	-1	-1	.	.	.
chr10	rs11189175	T	C	.	-1	-1	.	.	.
chr10	rs7074511	G	A	.	-1	-1	.	.	.
chr10	rs7092350	T	A	.	-1	-1	.	.	.
chr10	rs7092499	T	C	.	-1	-1	.	.	.
chr10	rs7078004	A	G	.	-1	-1	.	.	.
chr10	rs7096801	T	C	.	-1	-1	.	.	.
chr10	rs2275089	A	G	.	-1	-1	.	.	.
chr10	rs11189177	C	T	.	-1	-1	.	.	.
chr10	rs10882913	C	T	.	-1	-1	.	.	.
chr10	rs10882914	A	G	.	-1	-1	.	.	.
chr10	rs10882915	A	G	.	-1	-1	.	.	.
chr10	rs61863819	T	C	.	-1	-1	.	.	.
chr10	rs6584126	G	A	.	-1	-1	.	.	.
chr10	rs6584127	A	C	.	-1	-1	.	.	.
chr10	rs11189178	T	G	.	-1	-1	.	.	.
chr10	rs11189179	T	C	.	-1	-1	.	.	.
chr10	rs11189180	A	G	.	-1	-1	.	.	.
chr10	rs11189181	A	G	.	-1	-1	.	.	.
chr10	rs11189182	A	G	.	-1	-1	.	.	.
chr10	rs11189183	A	G	.	-1	-1	.	.	.
chr10	rs61861865	C	G	.	-1	-1	.	.	.
chr10	rs3818787	T	C	.	-1	-1	.	.	.
chr10	rs2297667	T	A	.	-1	-1	.	.	.
chr10	rs10882916	T	C	.	-1	-1	.	.	.
chr10	rs10882917	T	C	.	-1	-1	.	.	.
chr10	rs10786337	A	G	.	-1	-1	.	.	.
chr10	rs869967	T	C	.	-1	-1	.	.	.
chr10	rs2275090	A	G	.	-1	-1	.	.	.
chr10	rs11189191	T	C	.	-1	-1	.	.	.
chr10	rs10882918	A	G	.	-1	-1	.	.	.
chr10	rs10882919	C	A	.	-1	-1	.	.	.
chr10	rs148331122	A	G	.	-1	-1	.	.	.
chr10	rs141445387	C	T	.	-1	-1	.	.	.
chr10	rs113049384	G	A	.	-1	-1	.	.	.
chr10	rs11189192	G	A	.	-1	-1	.	.	.
chr10	rs60237341	A	G	.	-1	-1	.	.	.
chr10	rs12266723	G	A	.	-1	-1	.	.	.
chr10	rs1537645	T	C	.	-1	-1	.	.	.
chr10	rs1537646	T	C	.	-1	-1	.	.	.
chr10	rs7909345	T	C	.	-1	-1	.	.	.
chr10	rs10786338	A	T	.	-1	-1	.	.	.
chr10	rs10786339	A	G	.	-1	-1	.	.	.
chr10	rs11189195	C	T	.	-1	-1	.	.	.
chr10	rs7903562	T	C	.	-1	-1	.	.	.
chr10	rs7903847	T	C	.	-1	-1	.	.	.
chr10	rs11189196	A	G	.	-1	-1	.	.	.
chr10	rs11189197	A	G	.	-1	-1	.	.	.
chr10	rs9787426	A	G	.	-1	-1	.	.	.
chr10	rs9787454	A	T	.	-1	-1	.	.	.
chr10	rs7922512	C	A	.	-1	-1	.	.	.
chr10	rs3814553	G	A	.	-1	-1	.	.	.
chr10	rs11189200	C	G	.	-1	-1	.	.	.
chr10	rs10786340	G	C	.	-1	-1	.	.	.
chr10	rs7896100	C	T	.	-1	-1	.	.	.
chr10	rs7916665	T	G	.	-1	-1	.	.	.
chr10	rs7900255	G	A	.	-1	-1	.	.	.
chr10	rs10882922	C	T	.	-1	-1	.	.	.
chr10	rs10786341	G	A	.	-1	-1	.	.	.
chr10	rs10786342	C	G	.	-1	-1	.	.	.
chr10	rs10882923	G	A	.	-1	-1	.	.	.
chr10	rs11189203	C	A	.	-1	-1	.	.	.
chr10	rs10882924	T	A	.	-1	-1	.	.	.
chr10	rs9888116	G	A	.	-1	-1	.	.	.
chr10	rs9887991	T	C	.	-1	-1	.	.	.
chr10	rs9888026	A	C	.	-1	-1	.	.	.
chr10	rs9888117	C	G	.	-1	-1	.	.	.
chr10	rs2297668	C	T	.	-1	-1	.	.	.
chr10	rs1048442	A	G	.	-1	-1	.	.	.
chr10	rs10882926	T	C	.	-1	-1	.	.	.
chr10	rs11189204	C	T	.	-1	-1	.	.	.
chr10	rs2861952	C	A	.	-1	-1	.	.	.
chr10	rs11017542	G	A	.	-1	-1	.	.	.
chr10	rs11017547	A	G	.	-1	-1	.	.	.
chr10	rs11017548	A	G	.	-1	-1	.	.	.
chr12	rs11046434	C	T	chr12	22600000	22610000	chr12	21850000	21860000
chr12	rs11046434	C	T	chr12	22600000	22625000	chr12	21850000	21875000
chr12	rs11046434	C	T	chr12	22600000	22610000	chr12	22230000	22240000
chr12	rs73076614	T	C	.	-1	-1	.	.	.
chr12	rs11046452	T	C	.	-1	-1	.	.	.
chr12	rs11046465	C	A	chr12	22690000	22695000	chr12	22780000	22785000
chr12	rs11046471	G	A	.	-1	-1	.	.	.
chr12	rs11046473	A	G	.	-1	-1	.	.	.
chr12	rs11046497	G	A	.	-1	-1	.	.	.
chr12	rs73080457	A	G	chr12	22775000	22800000	chr12	22200000	22225000
chr12	rs2454744	C	T	.	-1	-1	.	.	.
chr12	rs1353905	G	A	.	-1	-1	.	.	.
chr12	rs586151	G	C	.	-1	-1	.	.	.
chr13	rs7334858	A	C	.	-1	-1	.	.	.
chr13	rs7983914	T	G	.	-1	-1	.	.	.
chr13	rs9595535	G	A	.	-1	-1	.	.	.
chr13	rs7324274	T	C	chr13	47400000	47410000	chr13	49340000	49350000
chr13	rs7324274	T	C	chr13	47400000	47425000	chr13	48325000	48350000
chr13	rs7324274	T	C	chr13	47400000	47425000	chr13	48650000	48675000
chr14	rs11850238	G	A	.	-1	-1	.	.	.
chr14	rs74854657	G	C	.	-1	-1	.	.	.
chr14	rs77626777	A	C	.	-1	-1	.	.	.
chr14	rs12435081	A	G	.	-1	-1	.	.	.
chr14	rs12435755	A	C	.	-1	-1	.	.	.
chr14	rs12435901	G	A	.	-1	-1	.	.	.
chr14	rs150636023	C	A	.	-1	-1	.	.	.
chr14	rs74895326	T	C	.	-1	-1	.	.	.
chr17	rs9906165	A	G	.	-1	-1	.	.	.
chr17	rs9906601	C	T	.	-1	-1	.	.	.
chr17	rs75741931	C	T	chr17	59425000	59450000	chr17	58775000	58800000
chr17	rs75741931	C	T	chr17	59425000	59450000	chr17	58800000	58825000
chr17	rs143968095	G	A	chr17	59425000	59450000	chr17	58775000	58800000
chr17	rs143968095	G	A	chr17	59425000	59450000	chr17	58800000	58825000
chr17	rs75073226	G	A	chr17	59425000	59450000	chr17	58775000	58800000
chr17	rs75073226	G	A	chr17	59425000	59450000	chr17	58800000	58825000
chr17	rs116271272	G	A	chr17	59425000	59450000	chr17	58775000	58800000
chr17	rs116271272	G	A	chr17	59425000	59450000	chr17	58800000	58825000

## Sheet: eQTL information
Table5. eQTL information association with significant SNP
Adipose_Subcutaneous
chr2	232058493	rs2368563	A	G	chr2	232055000	232060000	chr2	231970000	231975000	ENSG00000204128.5	4.18425e-07
chr2	232058493	rs2368563	A	G	chr2	232060000	232065000	chr2	231970000	231975000	ENSG00000204128.5	4.18425e-07
chr2	232058493	rs2368563	A	G	chr2	232060000	232070000	chr2	231970000	231980000	ENSG00000204128.5	4.18425e-07
chr2	232060843	rs60664562	T	A	chr2	232055000	232060000	chr2	231970000	231975000	ENSG00000204128.5	2.46609e-07
chr2	232060843	rs60664562	T	A	chr2	232060000	232065000	chr2	231970000	231975000	ENSG00000204128.5	2.46609e-07
chr2	232060843	rs60664562	T	A	chr2	232060000	232070000	chr2	231970000	231980000	ENSG00000204128.5	2.46609e-07
chr2	232061520	rs62197322	A	G	chr2	232055000	232060000	chr2	231970000	231975000	ENSG00000204128.5	1.35588e-07
chr2	232061520	rs62197322	A	G	chr2	232060000	232065000	chr2	231970000	231975000	ENSG00000204128.5	1.35588e-07
chr2	232061520	rs62197322	A	G	chr2	232060000	232070000	chr2	231970000	231980000	ENSG00000204128.5	1.35588e-07
chr5	158706713	rs13153734	C	T	chr5	158700000	158710000	chr5	158590000	158600000	ENSG00000245812.2	1.67476e-05
chr5	158706713	rs13153734	C	T	chr5	158700000	158725000	chr5	158575000	158600000	ENSG00000245812.2	1.67476e-05
chr5	158706713	rs13153734	C	T	chr5	158700000	158725000	chr5	159375000	159400000	ENSG00000245812.2	1.67476e-05
chr5	158706713	rs13153734	C	T	chr5	158710000	158720000	chr5	159820000	159830000	ENSG00000245812.2	1.67476e-05
chr5	158710998	rs35046837	G	A	chr5	158700000	158710000	chr5	158590000	158600000	ENSG00000245812.2	1.61943e-05
chr5	158710998	rs35046837	G	A	chr5	158700000	158725000	chr5	158575000	158600000	ENSG00000245812.2	1.61943e-05
chr5	158710998	rs35046837	G	A	chr5	158700000	158725000	chr5	159375000	159400000	ENSG00000245812.2	1.61943e-05
chr5	158710998	rs35046837	G	A	chr5	158710000	158720000	chr5	159820000	159830000	ENSG00000245812.2	1.61943e-05
chr5	158717068	rs13161132	A	C	chr5	158700000	158725000	chr5	158575000	158600000	ENSG00000245812.2	1.37745e-05
chr5	158717068	rs13161132	A	C	chr5	158700000	158725000	chr5	159375000	159400000	ENSG00000245812.2	1.37745e-05
chr5	158717068	rs13161132	A	C	chr5	158710000	158720000	chr5	159820000	159830000	ENSG00000245812.2	1.37745e-05
chr5	158717994	rs62378747	C	T	chr5	158700000	158725000	chr5	158575000	158600000	ENSG00000245812.2	1.67476e-05
chr5	158717994	rs62378747	C	T	chr5	158700000	158725000	chr5	159375000	159400000	ENSG00000245812.2	1.67476e-05
chr5	158717994	rs62378747	C	T	chr5	158710000	158720000	chr5	159820000	159830000	ENSG00000245812.2	1.67476e-05
chr5	158723293	rs1529710	C	T	chr5	158700000	158725000	chr5	158575000	158600000	ENSG00000245812.2	1.67476e-05
chr5	158723293	rs1529710	C	T	chr5	158700000	158725000	chr5	159375000	159400000	ENSG00000245812.2	1.67476e-05
chr5	158723293	rs1529710	C	T	chr5	158710000	158720000	chr5	159820000	159830000	ENSG00000245812.2	1.67476e-05
chr5	158724949	rs2116820	C	T	chr5	158700000	158725000	chr5	158575000	158600000	ENSG00000245812.2	1.67476e-05
chr5	158724949	rs2116820	C	T	chr5	158700000	158725000	chr5	159375000	159400000	ENSG00000245812.2	1.67476e-05
chr5	158724949	rs2116820	C	T	chr5	158710000	158720000	chr5	159820000	159830000	ENSG00000245812.2	1.67476e-05
chr5	158728642	rs62378748	T	C	chr5	158700000	158725000	chr5	158575000	158600000	ENSG00000245812.2	2.34029e-05
chr5	158728642	rs62378748	T	C	chr5	158700000	158725000	chr5	159375000	159400000	ENSG00000245812.2	2.34029e-05
chr6	32606274	rs113219465	C	T	chr6	32610000	32620000	chr6	45660000	45670000	ENSG00000198502.5	1.04242e-05
chr6	32606274	rs113219465	C	T	chr6	32600000	32625000	chr6	45650000	45675000	ENSG00000198502.5	1.04242e-05
chr6	32608762	rs80154958	T	C	chr6	32610000	32620000	chr6	45660000	45670000	ENSG00000198502.5	7.67288e-06
chr6	32608762	rs80154958	T	C	chr6	32600000	32625000	chr6	45650000	45675000	ENSG00000198502.5	7.67288e-06
chr6	32610310	rs113551974	C	T	chr6	32610000	32620000	chr6	45660000	45670000	ENSG00000198502.5	7.67288e-06
chr6	32610310	rs113551974	C	T	chr6	32600000	32625000	chr6	45650000	45675000	ENSG00000198502.5	7.67288e-06
chr6	32611624	rs73409538	G	T	chr6	32610000	32620000	chr6	45660000	45670000	ENSG00000198502.5	2.08503e-05
chr6	32611624	rs73409538	G	T	chr6	32600000	32625000	chr6	45650000	45675000	ENSG00000198502.5	2.08503e-05
chr6	45886740	rs12665031	C	T	chr6	45890000	45895000	chr6	44435000	44440000	ENSG00000112782.11	5.14859e-05
chr6	45886740	rs12665031	C	T	chr6	45890000	45900000	chr6	44440000	44450000	ENSG00000112782.11	5.14859e-05
chr6	45886740	rs12665031	C	T	chr6	45890000	45895000	chr6	44560000	44565000	ENSG00000112782.11	5.14859e-05
chr6	45886740	rs12665031	C	T	chr6	45890000	45900000	chr6	44600000	44610000	ENSG00000112782.11	5.14859e-05
chr6	45886740	rs12665031	C	T	chr6	45890000	45895000	chr6	44620000	44625000	ENSG00000112782.11	5.14859e-05
chr6	45886740	rs12665031	C	T	chr6	45890000	45900000	chr6	44620000	44630000	ENSG00000112782.11	5.14859e-05
chr6	45886740	rs12665031	C	T	chr6	45890000	45895000	chr6	45385000	45390000	ENSG00000112782.11	5.14859e-05
chr6	45886740	rs12665031	C	T	chr6	45890000	45900000	chr6	45680000	45690000	ENSG00000112782.11	5.14859e-05
chr6	45886740	rs12665031	C	T	chr6	45875000	45900000	chr6	45375000	45400000	ENSG00000112782.11	5.14859e-05
chr6	45887270	rs3777548	G	A	chr6	45890000	45895000	chr6	44435000	44440000	ENSG00000112782.11	5.14859e-05
chr6	45887270	rs3777548	G	A	chr6	45890000	45900000	chr6	44440000	44450000	ENSG00000112782.11	5.14859e-05
chr6	45887270	rs3777548	G	A	chr6	45890000	45895000	chr6	44560000	44565000	ENSG00000112782.11	5.14859e-05
chr6	45887270	rs3777548	G	A	chr6	45890000	45900000	chr6	44600000	44610000	ENSG00000112782.11	5.14859e-05
chr6	45887270	rs3777548	G	A	chr6	45890000	45895000	chr6	44620000	44625000	ENSG00000112782.11	5.14859e-05
chr6	45887270	rs3777548	G	A	chr6	45890000	45900000	chr6	44620000	44630000	ENSG00000112782.11	5.14859e-05
chr6	45887270	rs3777548	G	A	chr6	45890000	45895000	chr6	45385000	45390000	ENSG00000112782.11	5.14859e-05
chr6	45887270	rs3777548	G	A	chr6	45890000	45900000	chr6	45680000	45690000	ENSG00000112782.11	5.14859e-05
chr6	45887270	rs3777548	G	A	chr6	45875000	45900000	chr6	45375000	45400000	ENSG00000112782.11	5.14859e-05
chr6	45887319	rs1361215	C	T	chr6	45890000	45895000	chr6	44435000	44440000	ENSG00000112782.11	5.14859e-05
chr6	45887319	rs1361215	C	T	chr6	45890000	45900000	chr6	44440000	44450000	ENSG00000112782.11	5.14859e-05
chr6	45887319	rs1361215	C	T	chr6	45890000	45895000	chr6	44560000	44565000	ENSG00000112782.11	5.14859e-05
chr6	45887319	rs1361215	C	T	chr6	45890000	45900000	chr6	44600000	44610000	ENSG00000112782.11	5.14859e-05
chr6	45887319	rs1361215	C	T	chr6	45890000	45895000	chr6	44620000	44625000	ENSG00000112782.11	5.14859e-05
chr6	45887319	rs1361215	C	T	chr6	45890000	45900000	chr6	44620000	44630000	ENSG00000112782.11	5.14859e-05
chr6	45887319	rs1361215	C	T	chr6	45890000	45895000	chr6	45385000	45390000	ENSG00000112782.11	5.14859e-05
chr6	45887319	rs1361215	C	T	chr6	45890000	45900000	chr6	45680000	45690000	ENSG00000112782.11	5.14859e-05
chr6	45887319	rs1361215	C	T	chr6	45875000	45900000	chr6	45375000	45400000	ENSG00000112782.11	5.14859e-05
chr6	45887421	rs1416167	A	T	chr6	45890000	45895000	chr6	44435000	44440000	ENSG00000112782.11	2.38156e-05
chr6	45887421	rs1416167	A	T	chr6	45890000	45900000	chr6	44440000	44450000	ENSG00000112782.11	2.38156e-05
chr6	45887421	rs1416167	A	T	chr6	45890000	45895000	chr6	44560000	44565000	ENSG00000112782.11	2.38156e-05
chr6	45887421	rs1416167	A	T	chr6	45890000	45900000	chr6	44600000	44610000	ENSG00000112782.11	2.38156e-05
chr6	45887421	rs1416167	A	T	chr6	45890000	45895000	chr6	44620000	44625000	ENSG00000112782.11	2.38156e-05
chr6	45887421	rs1416167	A	T	chr6	45890000	45900000	chr6	44620000	44630000	ENSG00000112782.11	2.38156e-05
chr6	45887421	rs1416167	A	T	chr6	45890000	45895000	chr6	45385000	45390000	ENSG00000112782.11	2.38156e-05
chr6	45887421	rs1416167	A	T	chr6	45890000	45900000	chr6	45680000	45690000	ENSG00000112782.11	2.38156e-05
chr6	45887421	rs1416167	A	T	chr6	45875000	45900000	chr6	45375000	45400000	ENSG00000112782.11	2.38156e-05
chr6	45887576	rs9369590	T	C	chr6	45890000	45895000	chr6	44435000	44440000	ENSG00000112782.11	5.14859e-05
chr6	45887576	rs9369590	T	C	chr6	45890000	45900000	chr6	44440000	44450000	ENSG00000112782.11	5.14859e-05
chr6	45887576	rs9369590	T	C	chr6	45890000	45895000	chr6	44560000	44565000	ENSG00000112782.11	5.14859e-05
chr6	45887576	rs9369590	T	C	chr6	45890000	45900000	chr6	44600000	44610000	ENSG00000112782.11	5.14859e-05
chr6	45887576	rs9369590	T	C	chr6	45890000	45895000	chr6	44620000	44625000	ENSG00000112782.11	5.14859e-05
chr6	45887576	rs9369590	T	C	chr6	45890000	45900000	chr6	44620000	44630000	ENSG00000112782.11	5.14859e-05
chr6	45887576	rs9369590	T	C	chr6	45890000	45895000	chr6	45385000	45390000	ENSG00000112782.11	5.14859e-05
chr6	45887576	rs9369590	T	C	chr6	45890000	45900000	chr6	45680000	45690000	ENSG00000112782.11	5.14859e-05
chr6	45887576	rs9369590	T	C	chr6	45875000	45900000	chr6	45375000	45400000	ENSG00000112782.11	5.14859e-05
chr6	45887643	rs3822876	G	T	chr6	45890000	45895000	chr6	44435000	44440000	ENSG00000112782.11	5.14859e-05
chr6	45887643	rs3822876	G	T	chr6	45890000	45900000	chr6	44440000	44450000	ENSG00000112782.11	5.14859e-05
chr6	45887643	rs3822876	G	T	chr6	45890000	45895000	chr6	44560000	44565000	ENSG00000112782.11	5.14859e-05
chr6	45887643	rs3822876	G	T	chr6	45890000	45900000	chr6	44600000	44610000	ENSG00000112782.11	5.14859e-05
chr6	45887643	rs3822876	G	T	chr6	45890000	45895000	chr6	44620000	44625000	ENSG00000112782.11	5.14859e-05
chr6	45887643	rs3822876	G	T	chr6	45890000	45900000	chr6	44620000	44630000	ENSG00000112782.11	5.14859e-05
chr6	45887643	rs3822876	G	T	chr6	45890000	45895000	chr6	45385000	45390000	ENSG00000112782.11	5.14859e-05
chr6	45887643	rs3822876	G	T	chr6	45890000	45900000	chr6	45680000	45690000	ENSG00000112782.11	5.14859e-05
chr6	45887643	rs3822876	G	T	chr6	45875000	45900000	chr6	45375000	45400000	ENSG00000112782.11	5.14859e-05
chr6	45887903	rs3822878	G	A	chr6	45890000	45895000	chr6	44435000	44440000	ENSG00000112782.11	5.14859e-05
chr6	45887903	rs3822878	G	A	chr6	45890000	45900000	chr6	44440000	44450000	ENSG00000112782.11	5.14859e-05
chr6	45887903	rs3822878	G	A	chr6	45890000	45895000	chr6	44560000	44565000	ENSG00000112782.11	5.14859e-05
chr6	45887903	rs3822878	G	A	chr6	45890000	45900000	chr6	44600000	44610000	ENSG00000112782.11	5.14859e-05
chr6	45887903	rs3822878	G	A	chr6	45890000	45895000	chr6	44620000	44625000	ENSG00000112782.11	5.14859e-05
chr6	45887903	rs3822878	G	A	chr6	45890000	45900000	chr6	44620000	44630000	ENSG00000112782.11	5.14859e-05
chr6	45887903	rs3822878	G	A	chr6	45890000	45895000	chr6	45385000	45390000	ENSG00000112782.11	5.14859e-05
chr6	45887903	rs3822878	G	A	chr6	45890000	45900000	chr6	45680000	45690000	ENSG00000112782.11	5.14859e-05
chr6	45887903	rs3822878	G	A	chr6	45875000	45900000	chr6	45375000	45400000	ENSG00000112782.11	5.14859e-05
chr6	45887922	rs3822879	A	T	chr6	45890000	45895000	chr6	44435000	44440000	ENSG00000112782.11	5.14859e-05
chr6	45887922	rs3822879	A	T	chr6	45890000	45900000	chr6	44440000	44450000	ENSG00000112782.11	5.14859e-05
chr6	45887922	rs3822879	A	T	chr6	45890000	45895000	chr6	44560000	44565000	ENSG00000112782.11	5.14859e-05
chr6	45887922	rs3822879	A	T	chr6	45890000	45900000	chr6	44600000	44610000	ENSG00000112782.11	5.14859e-05
chr6	45887922	rs3822879	A	T	chr6	45890000	45895000	chr6	44620000	44625000	ENSG00000112782.11	5.14859e-05
chr6	45887922	rs3822879	A	T	chr6	45890000	45900000	chr6	44620000	44630000	ENSG00000112782.11	5.14859e-05
chr6	45887922	rs3822879	A	T	chr6	45890000	45895000	chr6	45385000	45390000	ENSG00000112782.11	5.14859e-05
chr6	45887922	rs3822879	A	T	chr6	45890000	45900000	chr6	45680000	45690000	ENSG00000112782.11	5.14859e-05
chr6	45887922	rs3822879	A	T	chr6	45875000	45900000	chr6	45375000	45400000	ENSG00000112782.11	5.14859e-05
chr6	45887939	rs3822880	C	T	chr6	45890000	45895000	chr6	44435000	44440000	ENSG00000112782.11	5.11206e-05
chr6	45887939	rs3822880	C	T	chr6	45890000	45900000	chr6	44440000	44450000	ENSG00000112782.11	5.11206e-05
chr6	45887939	rs3822880	C	T	chr6	45890000	45895000	chr6	44560000	44565000	ENSG00000112782.11	5.11206e-05
chr6	45887939	rs3822880	C	T	chr6	45890000	45900000	chr6	44600000	44610000	ENSG00000112782.11	5.11206e-05
chr6	45887939	rs3822880	C	T	chr6	45890000	45895000	chr6	44620000	44625000	ENSG00000112782.11	5.11206e-05
chr6	45887939	rs3822880	C	T	chr6	45890000	45900000	chr6	44620000	44630000	ENSG00000112782.11	5.11206e-05
chr6	45887939	rs3822880	C	T	chr6	45890000	45895000	chr6	45385000	45390000	ENSG00000112782.11	5.11206e-05
chr6	45887939	rs3822880	C	T	chr6	45890000	45900000	chr6	45680000	45690000	ENSG00000112782.11	5.11206e-05
chr6	45887939	rs3822880	C	T	chr6	45875000	45900000	chr6	45375000	45400000	ENSG00000112782.11	5.11206e-05
chr6	45888022	rs3822881	A	T	chr6	45890000	45895000	chr6	44435000	44440000	ENSG00000112782.11	5.14859e-05
chr6	45888022	rs3822881	A	T	chr6	45890000	45900000	chr6	44440000	44450000	ENSG00000112782.11	5.14859e-05
chr6	45888022	rs3822881	A	T	chr6	45890000	45895000	chr6	44560000	44565000	ENSG00000112782.11	5.14859e-05
chr6	45888022	rs3822881	A	T	chr6	45890000	45900000	chr6	44600000	44610000	ENSG00000112782.11	5.14859e-05
chr6	45888022	rs3822881	A	T	chr6	45890000	45895000	chr6	44620000	44625000	ENSG00000112782.11	5.14859e-05
chr6	45888022	rs3822881	A	T	chr6	45890000	45900000	chr6	44620000	44630000	ENSG00000112782.11	5.14859e-05
chr6	45888022	rs3822881	A	T	chr6	45890000	45895000	chr6	45385000	45390000	ENSG00000112782.11	5.14859e-05
chr6	45888022	rs3822881	A	T	chr6	45890000	45900000	chr6	45680000	45690000	ENSG00000112782.11	5.14859e-05
chr6	45888022	rs3822881	A	T	chr6	45875000	45900000	chr6	45375000	45400000	ENSG00000112782.11	5.14859e-05
chr6	45888073	rs3729618	A	G	chr6	45890000	45895000	chr6	44435000	44440000	ENSG00000112782.11	5.14859e-05
chr6	45888073	rs3729618	A	G	chr6	45890000	45900000	chr6	44440000	44450000	ENSG00000112782.11	5.14859e-05
chr6	45888073	rs3729618	A	G	chr6	45890000	45895000	chr6	44560000	44565000	ENSG00000112782.11	5.14859e-05
chr6	45888073	rs3729618	A	G	chr6	45890000	45900000	chr6	44600000	44610000	ENSG00000112782.11	5.14859e-05
chr6	45888073	rs3729618	A	G	chr6	45890000	45895000	chr6	44620000	44625000	ENSG00000112782.11	5.14859e-05
chr6	45888073	rs3729618	A	G	chr6	45890000	45900000	chr6	44620000	44630000	ENSG00000112782.11	5.14859e-05
chr6	45888073	rs3729618	A	G	chr6	45890000	45895000	chr6	45385000	45390000	ENSG00000112782.11	5.14859e-05
chr6	45888073	rs3729618	A	G	chr6	45890000	45900000	chr6	45680000	45690000	ENSG00000112782.11	5.14859e-05
chr6	45888073	rs3729618	A	G	chr6	45875000	45900000	chr6	45375000	45400000	ENSG00000112782.11	5.14859e-05
chr6	45889793	rs12204991	A	T	chr6	45890000	45895000	chr6	44435000	44440000	ENSG00000112782.11	3.51278e-05
chr6	45889793	rs12204991	A	T	chr6	45890000	45900000	chr6	44440000	44450000	ENSG00000112782.11	3.51278e-05
chr6	45889793	rs12204991	A	T	chr6	45890000	45895000	chr6	44560000	44565000	ENSG00000112782.11	3.51278e-05
chr6	45889793	rs12204991	A	T	chr6	45890000	45900000	chr6	44600000	44610000	ENSG00000112782.11	3.51278e-05
chr6	45889793	rs12204991	A	T	chr6	45890000	45895000	chr6	44620000	44625000	ENSG00000112782.11	3.51278e-05
chr6	45889793	rs12204991	A	T	chr6	45890000	45900000	chr6	44620000	44630000	ENSG00000112782.11	3.51278e-05
chr6	45889793	rs12204991	A	T	chr6	45890000	45895000	chr6	45385000	45390000	ENSG00000112782.11	3.51278e-05
chr6	45889793	rs12204991	A	T	chr6	45890000	45900000	chr6	45680000	45690000	ENSG00000112782.11	3.51278e-05
chr6	45889793	rs12204991	A	T	chr6	45875000	45900000	chr6	45375000	45400000	ENSG00000112782.11	3.51278e-05
chr6	45892487	rs9367229	T	C	chr6	45895000	45900000	chr6	46375000	46380000	ENSG00000112782.11	3.53831e-05
chr6	45892487	rs9367229	T	C	chr6	45890000	45895000	chr6	44435000	44440000	ENSG00000112782.11	3.53831e-05
chr6	45892487	rs9367229	T	C	chr6	45890000	45900000	chr6	44440000	44450000	ENSG00000112782.11	3.53831e-05
chr6	45892487	rs9367229	T	C	chr6	45890000	45895000	chr6	44560000	44565000	ENSG00000112782.11	3.53831e-05
chr6	45892487	rs9367229	T	C	chr6	45890000	45900000	chr6	44600000	44610000	ENSG00000112782.11	3.53831e-05
chr6	45892487	rs9367229	T	C	chr6	45890000	45895000	chr6	44620000	44625000	ENSG00000112782.11	3.53831e-05
chr6	45892487	rs9367229	T	C	chr6	45890000	45900000	chr6	44620000	44630000	ENSG00000112782.11	3.53831e-05
chr6	45892487	rs9367229	T	C	chr6	45890000	45895000	chr6	45385000	45390000	ENSG00000112782.11	3.53831e-05
chr6	45892487	rs9367229	T	C	chr6	45890000	45900000	chr6	45680000	45690000	ENSG00000112782.11	3.53831e-05
chr6	45892487	rs9367229	T	C	chr6	45875000	45900000	chr6	45375000	45400000	ENSG00000112782.11	3.53831e-05
chr7	26702506	rs757129	C	G	chr7	26700000	26725000	chr7	26100000	26125000	ENSG00000122592.6	2.6823e-05
chr7	26702506	rs757129	C	G	chr7	26700000	26710000	chr7	26130000	26140000	ENSG00000122592.6	2.6823e-05
chr7	26702506	rs757129	C	G	chr7	26700000	26725000	chr7	26225000	26250000	ENSG00000122592.6	2.6823e-05
chr7	26702506	rs757129	C	G	chr7	26705000	26710000	chr7	25930000	25935000	ENSG00000122592.6	2.6823e-05
chr7	26702506	rs757129	C	G	chr7	26705000	26710000	chr7	26405000	26410000	ENSG00000122592.6	2.6823e-05
chr7	26702506	rs757129	C	G	chr7	26705000	26710000	chr7	26410000	26415000	ENSG00000122592.6	2.6823e-05
chr7	115897222	rs2402058	A	G	chr7	115890000	115900000	chr7	116160000	116170000	ENSG00000237870.2	6.55552e-06
chr7	115897222	rs2402058	A	G	chr7	115890000	115900000	chr7	116440000	116450000	ENSG00000237870.2	6.55552e-06
chr7	115897222	rs2402058	A	G	chr7	115895000	115900000	chr7	116225000	116230000	ENSG00000237870.2	6.55552e-06
chr7	115897222	rs2402058	A	G	chr7	115895000	115900000	chr7	116445000	116450000	ENSG00000237870.2	6.55552e-06
chr7	115897222	rs2402058	A	G	chr7	115895000	115900000	chr7	116450000	116455000	ENSG00000237870.2	6.55552e-06
chr7	115897242	rs2402059	T	G	chr7	115890000	115900000	chr7	116160000	116170000	ENSG00000237870.2	6.55552e-06
chr7	115897242	rs2402059	T	G	chr7	115890000	115900000	chr7	116440000	116450000	ENSG00000237870.2	6.55552e-06
chr7	115897242	rs2402059	T	G	chr7	115895000	115900000	chr7	116225000	116230000	ENSG00000237870.2	6.55552e-06
chr7	115897242	rs2402059	T	G	chr7	115895000	115900000	chr7	116445000	116450000	ENSG00000237870.2	6.55552e-06
chr7	115897242	rs2402059	T	G	chr7	115895000	115900000	chr7	116450000	116455000	ENSG00000237870.2	6.55552e-06
chr7	115899335	rs4730721	T	A	chr7	115890000	115900000	chr7	116160000	116170000	ENSG00000237870.2	8.33831e-06
chr7	115899335	rs4730721	T	A	chr7	115890000	115900000	chr7	116440000	116450000	ENSG00000237870.2	8.33831e-06
chr7	115899335	rs4730721	T	A	chr7	115895000	115900000	chr7	116225000	116230000	ENSG00000237870.2	8.33831e-06
chr7	115899335	rs4730721	T	A	chr7	115895000	115900000	chr7	116445000	116450000	ENSG00000237870.2	8.33831e-06
chr7	115899335	rs4730721	T	A	chr7	115895000	115900000	chr7	116450000	116455000	ENSG00000237870.2	8.33831e-06
chr7	115900262	rs10242959	C	T	chr7	115890000	115900000	chr7	116160000	116170000	ENSG00000237870.2	4.85148e-06
chr7	115900262	rs10242959	C	T	chr7	115890000	115900000	chr7	116440000	116450000	ENSG00000237870.2	4.85148e-06
chr7	115900262	rs10242959	C	T	chr7	115895000	115900000	chr7	116225000	116230000	ENSG00000237870.2	4.85148e-06
chr7	115900262	rs10242959	C	T	chr7	115895000	115900000	chr7	116445000	116450000	ENSG00000237870.2	4.85148e-06
chr7	115900262	rs10242959	C	T	chr7	115895000	115900000	chr7	116450000	116455000	ENSG00000237870.2	4.85148e-06
chr7	115900353	rs10261531	T	A	chr7	115890000	115900000	chr7	116160000	116170000	ENSG00000237870.2	5.07857e-06
chr7	115900353	rs10261531	T	A	chr7	115890000	115900000	chr7	116440000	116450000	ENSG00000237870.2	5.07857e-06
chr7	115900353	rs10261531	T	A	chr7	115895000	115900000	chr7	116225000	116230000	ENSG00000237870.2	5.07857e-06
chr7	115900353	rs10261531	T	A	chr7	115895000	115900000	chr7	116445000	116450000	ENSG00000237870.2	5.07857e-06
chr7	115900353	rs10261531	T	A	chr7	115895000	115900000	chr7	116450000	116455000	ENSG00000237870.2	5.07857e-06
chr7	115900724	rs10500061	C	G	chr7	115890000	115900000	chr7	116160000	116170000	ENSG00000237870.2	4.93285e-06
chr7	115900724	rs10500061	C	G	chr7	115890000	115900000	chr7	116440000	116450000	ENSG00000237870.2	4.93285e-06
chr7	115900724	rs10500061	C	G	chr7	115895000	115900000	chr7	116225000	116230000	ENSG00000237870.2	4.93285e-06
chr7	115900724	rs10500061	C	G	chr7	115895000	115900000	chr7	116445000	116450000	ENSG00000237870.2	4.93285e-06
chr7	115900724	rs10500061	C	G	chr7	115895000	115900000	chr7	116450000	116455000	ENSG00000237870.2	4.93285e-06
chr7	115900820	rs60927526	T	G	chr7	115890000	115900000	chr7	116160000	116170000	ENSG00000237870.2	8.08256e-06
chr7	115900820	rs60927526	T	G	chr7	115890000	115900000	chr7	116440000	116450000	ENSG00000237870.2	8.08256e-06
chr7	115900820	rs60927526	T	G	chr7	115895000	115900000	chr7	116225000	116230000	ENSG00000237870.2	8.08256e-06
chr7	115900820	rs60927526	T	G	chr7	115895000	115900000	chr7	116445000	116450000	ENSG00000237870.2	8.08256e-06
chr7	115900820	rs60927526	T	G	chr7	115895000	115900000	chr7	116450000	116455000	ENSG00000237870.2	8.08256e-06
chr11	64129722	rs538147	G	A	chr11	64130000	64140000	chr11	64410000	64420000	ENSG00000236935.1	2.06215e-05
chr11	64412891	rs11820322	C	T	chr11	64410000	64420000	chr11	64130000	64140000	ENSG00000110076.14	1.76616e-05
chr11	64412891	rs11820322	C	T	chr11	64410000	64420000	chr11	64320000	64330000	ENSG00000110076.14	1.76616e-05
chr14	96030442	rs7152619	T	C	chr14	96030000	96040000	chr14	96460000	96470000	ENSG00000182512.4	9.34469e-06
chr14	96030442	rs7152619	T	C	chr14	96020000	96030000	chr14	96460000	96470000	ENSG00000182512.4	9.34469e-06
chr14	96030442	rs7152619	T	C	chr14	96025000	96030000	chr14	96460000	96465000	ENSG00000182512.4	9.34469e-06
chr14	96030763	rs8014367	C	T	chr14	96030000	96040000	chr14	96460000	96470000	ENSG00000182512.4	1.68764e-05
chr14	96030763	rs8014367	C	T	chr14	96020000	96030000	chr14	96460000	96470000	ENSG00000182512.4	1.68764e-05
chr14	96030763	rs8014367	C	T	chr14	96025000	96030000	chr14	96460000	96465000	ENSG00000182512.4	1.68764e-05
chr14	96031957	rs9323929	C	T	chr14	96030000	96040000	chr14	96460000	96470000	ENSG00000182512.4	2.0606e-05
chr14	96031957	rs9323929	C	T	chr14	96020000	96030000	chr14	96460000	96470000	ENSG00000182512.4	2.0606e-05
chr14	96031957	rs9323929	C	T	chr14	96025000	96030000	chr14	96460000	96465000	ENSG00000182512.4	2.0606e-05
chr20	13786587	rs6079180	A	G	chr20	13790000	13800000	chr20	14030000	14040000	ENSG00000101247.13	8.06001e-28
Adipose_Visceral_Omentum
chr2	232058493	rs2368563	A	G	chr2	232055000	232060000	chr2	231970000	231975000	ENSG00000204128.5	2.23288e-08
chr2	232058493	rs2368563	A	G	chr2	232060000	232065000	chr2	231970000	231975000	ENSG00000204128.5	2.23288e-08
chr2	232058493	rs2368563	A	G	chr2	232060000	232070000	chr2	231970000	231980000	ENSG00000204128.5	2.23288e-08
chr2	232060843	rs60664562	T	A	chr2	232055000	232060000	chr2	231970000	231975000	ENSG00000204128.5	6.29418e-09
chr2	232060843	rs60664562	T	A	chr2	232060000	232065000	chr2	231970000	231975000	ENSG00000204128.5	6.29418e-09
chr2	232060843	rs60664562	T	A	chr2	232060000	232070000	chr2	231970000	231980000	ENSG00000204128.5	6.29418e-09
chr2	232061520	rs62197322	A	G	chr2	232055000	232060000	chr2	231970000	231975000	ENSG00000204128.5	1.5487e-08
chr2	232061520	rs62197322	A	G	chr2	232060000	232065000	chr2	231970000	231975000	ENSG00000204128.5	1.5487e-08
chr2	232061520	rs62197322	A	G	chr2	232060000	232070000	chr2	231970000	231980000	ENSG00000204128.5	1.5487e-08
chr6	32606274	rs113219465	C	T	chr6	32610000	32620000	chr6	45660000	45670000	ENSG00000198502.5	7.66474e-06
chr6	32606274	rs113219465	C	T	chr6	32600000	32625000	chr6	45650000	45675000	ENSG00000198502.5	7.66474e-06
chr6	32608762	rs80154958	T	C	chr6	32610000	32620000	chr6	45660000	45670000	ENSG00000198502.5	5.85733e-06
chr6	32608762	rs80154958	T	C	chr6	32600000	32625000	chr6	45650000	45675000	ENSG00000198502.5	5.85733e-06
chr6	32610310	rs113551974	C	T	chr6	32610000	32620000	chr6	45660000	45670000	ENSG00000198502.5	5.85733e-06
chr6	32610310	rs113551974	C	T	chr6	32600000	32625000	chr6	45650000	45675000	ENSG00000198502.5	5.85733e-06
chr6	32611624	rs73409538	G	T	chr6	32610000	32620000	chr6	45660000	45670000	ENSG00000198502.5	5.85733e-06
chr6	32611624	rs73409538	G	T	chr6	32600000	32625000	chr6	45650000	45675000	ENSG00000198502.5	5.85733e-06
chr6	32629931	rs41542812	C	G	chr6	32600000	32625000	chr6	45650000	45675000	ENSG00000198502.5	1.38236e-05
chr7	115860783	rs1004107	A	T	chr7	115865000	115870000	chr7	115830000	115835000	ENSG00000135269.13	4.85512e-05
chr7	115861660	rs9969224	T	C	chr7	115865000	115870000	chr7	115830000	115835000	ENSG00000135269.13	4.85512e-05
chr7	115862902	rs1000966	A	G	chr7	115865000	115870000	chr7	115830000	115835000	ENSG00000135269.13	4.85512e-05
chr7	115863446	rs3807968	G	A	chr7	115865000	115870000	chr7	115830000	115835000	ENSG00000135269.13	4.85512e-05
chr7	115880277	rs3807975	G	A	chr7	115870000	115880000	chr7	115810000	115820000	ENSG00000135269.13	4.66283e-05
chr7	115880277	rs3807975	G	A	chr7	115875000	115880000	chr7	115815000	115820000	ENSG00000135269.13	4.66283e-05
chr7	115881159	rs66652906	G	A	chr7	115870000	115880000	chr7	115810000	115820000	ENSG00000135269.13	3.99571e-05
chr7	115881159	rs66652906	G	A	chr7	115875000	115880000	chr7	115815000	115820000	ENSG00000135269.13	3.99571e-05
chr7	115881458	rs58595078	A	G	chr7	115870000	115880000	chr7	115810000	115820000	ENSG00000135269.13	4.85512e-05
chr7	115881458	rs58595078	A	G	chr7	115875000	115880000	chr7	115815000	115820000	ENSG00000135269.13	4.85512e-05
chr7	115892650	rs1048508	T	G	chr7	115890000	115900000	chr7	116160000	116170000	ENSG00000135269.13	4.28575e-05
chr7	115892650	rs1048508	T	G	chr7	115890000	115900000	chr7	116440000	116450000	ENSG00000135269.13	4.28575e-05
chr7	115892650	rs1048508	T	G	chr7	115895000	115900000	chr7	116225000	116230000	ENSG00000135269.13	4.28575e-05
chr7	115892650	rs1048508	T	G	chr7	115895000	115900000	chr7	116445000	116450000	ENSG00000135269.13	4.28575e-05
chr7	115892650	rs1048508	T	G	chr7	115895000	115900000	chr7	116450000	116455000	ENSG00000135269.13	4.28575e-05
chr7	115892738	rs17138472	A	G	chr7	115890000	115900000	chr7	116160000	116170000	ENSG00000135269.13	4.19706e-05
chr7	115892738	rs17138472	A	G	chr7	115890000	115900000	chr7	116440000	116450000	ENSG00000135269.13	4.19706e-05
chr7	115892738	rs17138472	A	G	chr7	115895000	115900000	chr7	116225000	116230000	ENSG00000135269.13	4.19706e-05
chr7	115892738	rs17138472	A	G	chr7	115895000	115900000	chr7	116445000	116450000	ENSG00000135269.13	4.19706e-05
chr7	115892738	rs17138472	A	G	chr7	115895000	115900000	chr7	116450000	116455000	ENSG00000135269.13	4.19706e-05
chr7	115893647	rs3807980	A	G	chr7	115890000	115900000	chr7	116160000	116170000	ENSG00000135269.13	4.28575e-05
chr7	115893647	rs3807980	A	G	chr7	115890000	115900000	chr7	116440000	116450000	ENSG00000135269.13	4.28575e-05
chr7	115893647	rs3807980	A	G	chr7	115895000	115900000	chr7	116225000	116230000	ENSG00000135269.13	4.28575e-05
chr7	115893647	rs3807980	A	G	chr7	115895000	115900000	chr7	116445000	116450000	ENSG00000135269.13	4.28575e-05
chr7	115893647	rs3807980	A	G	chr7	115895000	115900000	chr7	116450000	116455000	ENSG00000135269.13	4.28575e-05
chr7	115894403	rs17138486	C	G	chr7	115890000	115900000	chr7	116160000	116170000	ENSG00000135269.13	4.42024e-05
chr7	115894403	rs17138486	C	G	chr7	115890000	115900000	chr7	116440000	116450000	ENSG00000135269.13	4.42024e-05
chr7	115894403	rs17138486	C	G	chr7	115895000	115900000	chr7	116225000	116230000	ENSG00000135269.13	4.42024e-05
chr7	115894403	rs17138486	C	G	chr7	115895000	115900000	chr7	116445000	116450000	ENSG00000135269.13	4.42024e-05
chr7	115894403	rs17138486	C	G	chr7	115895000	115900000	chr7	116450000	116455000	ENSG00000135269.13	4.42024e-05
chr7	115897871	rs2896180	A	G	chr7	115890000	115900000	chr7	116160000	116170000	ENSG00000135269.13	4.70289e-05
chr7	115897871	rs2896180	A	G	chr7	115890000	115900000	chr7	116440000	116450000	ENSG00000135269.13	4.70289e-05
chr7	115897871	rs2896180	A	G	chr7	115895000	115900000	chr7	116225000	116230000	ENSG00000135269.13	4.70289e-05
chr7	115897871	rs2896180	A	G	chr7	115895000	115900000	chr7	116445000	116450000	ENSG00000135269.13	4.70289e-05
chr7	115897871	rs2896180	A	G	chr7	115895000	115900000	chr7	116450000	116455000	ENSG00000135269.13	4.70289e-05
chr7	115897884	rs2896181	C	T	chr7	115890000	115900000	chr7	116160000	116170000	ENSG00000135269.13	4.70289e-05
chr7	115897884	rs2896181	C	T	chr7	115890000	115900000	chr7	116440000	116450000	ENSG00000135269.13	4.70289e-05
chr7	115897884	rs2896181	C	T	chr7	115895000	115900000	chr7	116225000	116230000	ENSG00000135269.13	4.70289e-05
chr7	115897884	rs2896181	C	T	chr7	115895000	115900000	chr7	116445000	116450000	ENSG00000135269.13	4.70289e-05
chr7	115897884	rs2896181	C	T	chr7	115895000	115900000	chr7	116450000	116455000	ENSG00000135269.13	4.70289e-05
chr7	115900686	rs10500060	C	T	chr7	115890000	115900000	chr7	116160000	116170000	ENSG00000135269.13	4.27114e-05
chr7	115900686	rs10500060	C	T	chr7	115890000	115900000	chr7	116440000	116450000	ENSG00000135269.13	4.27114e-05
chr7	115900686	rs10500060	C	T	chr7	115895000	115900000	chr7	116225000	116230000	ENSG00000135269.13	4.27114e-05
chr7	115900686	rs10500060	C	T	chr7	115895000	115900000	chr7	116445000	116450000	ENSG00000135269.13	4.27114e-05
chr7	115900686	rs10500060	C	T	chr7	115895000	115900000	chr7	116450000	116455000	ENSG00000135269.13	4.27114e-05
chr11	64129722	rs538147	G	A	chr11	64130000	64140000	chr11	64410000	64420000	ENSG00000236935.1	7.0337e-07
chr13	44397815	rs9533634	T	C	chr13	44375000	44400000	chr13	43150000	43175000	ENSG00000151773.8	3.16032e-09
chr13	44397815	rs9533634	T	C	chr13	44375000	44400000	chr13	43525000	43550000	ENSG00000151773.8	3.16032e-09
chr13	44397815	rs9533634	T	C	chr13	44375000	44400000	chr13	43650000	43675000	ENSG00000151773.8	3.16032e-09
chr13	44457925	rs3764147	A	G	chr13	44450000	44460000	chr13	43560000	43570000	ENSG00000151773.8	1.8577e-08
chr14	90858484	rs7150626	C	T	chr14	90850000	90860000	chr14	90420000	90430000	ENSG00000198668.6	2.64288e-06
chr14	90858484	rs7150626	C	T	chr14	90860000	90870000	chr14	91220000	91230000	ENSG00000198668.6	2.64288e-06
chr16	57452165	rs188872	A	G	chr16	57445000	57450000	chr16	57335000	57340000	ENSG00000005194.10	1.92362e-07
chr16	57452165	rs188872	A	G	chr16	57450000	57460000	chr16	57550000	57560000	ENSG00000005194.10	1.92362e-07
chr16	57452165	rs188872	A	G	chr16	57455000	57460000	chr16	57335000	57340000	ENSG00000005194.10	1.92362e-07
chr20	13786587	rs6079180	A	G	chr20	13790000	13800000	chr20	14030000	14040000	ENSG00000101247.13	1.17488e-12
AdreTl_Gland
chr7	115860783	rs1004107	A	T	chr7	115865000	115870000	chr7	115830000	115835000	ENSG00000135269.13	1.00525e-10
chr7	115861660	rs9969224	T	C	chr7	115865000	115870000	chr7	115830000	115835000	ENSG00000135269.13	1.00525e-10
chr7	115862296	rs1004109	A	T	chr7	115865000	115870000	chr7	115830000	115835000	ENSG00000135269.13	9.40764e-11
chr7	115862902	rs1000966	A	G	chr7	115865000	115870000	chr7	115830000	115835000	ENSG00000135269.13	1.40716e-10
chr7	115863446	rs3807968	G	A	chr7	115865000	115870000	chr7	115830000	115835000	ENSG00000135269.13	1.00525e-10
chr7	115864889	rs3779509	C	A	chr7	115865000	115870000	chr7	115830000	115835000	ENSG00000135269.13	9.0732e-11
chr7	115866354	rs1881287	A	G	chr7	115870000	115880000	chr7	115810000	115820000	ENSG00000135269.13	9.0732e-11
chr7	115866354	rs1881287	A	G	chr7	115865000	115870000	chr7	115830000	115835000	ENSG00000135269.13	9.0732e-11
chr7	115868798	rs58624059	T	C	chr7	115870000	115880000	chr7	115810000	115820000	ENSG00000135269.13	5.19595e-11
chr7	115868798	rs58624059	T	C	chr7	115865000	115870000	chr7	115830000	115835000	ENSG00000135269.13	5.19595e-11
chr7	115874466	rs12670683	T	C	chr7	115870000	115880000	chr7	115810000	115820000	ENSG00000135269.13	9.26489e-11
chr7	115874466	rs12670683	T	C	chr7	115875000	115880000	chr7	115815000	115820000	ENSG00000135269.13	9.26489e-11
chr7	115874466	rs12670683	T	C	chr7	115865000	115870000	chr7	115830000	115835000	ENSG00000135269.13	9.26489e-11
chr7	115874560	rs2030978	C	T	chr7	115870000	115880000	chr7	115810000	115820000	ENSG00000135269.13	9.0732e-11
chr7	115874560	rs2030978	C	T	chr7	115875000	115880000	chr7	115815000	115820000	ENSG00000135269.13	9.0732e-11
chr7	115874560	rs2030978	C	T	chr7	115865000	115870000	chr7	115830000	115835000	ENSG00000135269.13	9.0732e-11
chr7	115875359	rs2030977	G	C	chr7	115870000	115880000	chr7	115810000	115820000	ENSG00000135269.13	9.0732e-11
chr7	115875359	rs2030977	G	C	chr7	115875000	115880000	chr7	115815000	115820000	ENSG00000135269.13	9.0732e-11
chr7	115876365	rs6959237	C	T	chr7	115870000	115880000	chr7	115810000	115820000	ENSG00000135269.13	9.0732e-11
chr7	115876365	rs6959237	C	T	chr7	115875000	115880000	chr7	115815000	115820000	ENSG00000135269.13	9.0732e-11
chr7	115880277	rs3807975	G	A	chr7	115870000	115880000	chr7	115810000	115820000	ENSG00000135269.13	9.0732e-11
chr7	115880277	rs3807975	G	A	chr7	115875000	115880000	chr7	115815000	115820000	ENSG00000135269.13	9.0732e-11
chr7	115881159	rs66652906	G	A	chr7	115870000	115880000	chr7	115810000	115820000	ENSG00000135269.13	9.52337e-11
chr7	115881159	rs66652906	G	A	chr7	115875000	115880000	chr7	115815000	115820000	ENSG00000135269.13	9.52337e-11
chr7	115881458	rs58595078	A	G	chr7	115870000	115880000	chr7	115810000	115820000	ENSG00000135269.13	1.00525e-10
chr7	115881458	rs58595078	A	G	chr7	115875000	115880000	chr7	115815000	115820000	ENSG00000135269.13	1.00525e-10
chr7	115882323	rs3757730	G	A	chr7	115870000	115880000	chr7	115810000	115820000	ENSG00000135269.13	9.0732e-11
chr7	115882323	rs3757730	G	A	chr7	115875000	115880000	chr7	115815000	115820000	ENSG00000135269.13	9.0732e-11
chr7	115883453	rs57321537	T	G	chr7	115870000	115880000	chr7	115810000	115820000	ENSG00000135269.13	1.12157e-10
chr7	115883453	rs57321537	T	G	chr7	115875000	115880000	chr7	115815000	115820000	ENSG00000135269.13	1.12157e-10
chr7	115884319	rs138623810	C	A	chr7	115870000	115880000	chr7	115810000	115820000	ENSG00000135269.13	9.0732e-11
chr7	115884319	rs138623810	C	A	chr7	115875000	115880000	chr7	115815000	115820000	ENSG00000135269.13	9.0732e-11
chr7	115886079	rs7811984	A	G	chr7	115890000	115900000	chr7	116160000	116170000	ENSG00000135269.13	9.0732e-11
chr7	115886079	rs7811984	A	G	chr7	115890000	115900000	chr7	116440000	116450000	ENSG00000135269.13	9.0732e-11
chr7	115888162	rs6953050	A	G	chr7	115890000	115900000	chr7	116160000	116170000	ENSG00000135269.13	9.0732e-11
chr7	115888162	rs6953050	A	G	chr7	115890000	115900000	chr7	116440000	116450000	ENSG00000135269.13	9.0732e-11
chr7	115888339	rs6957561	G	A	chr7	115890000	115900000	chr7	116160000	116170000	ENSG00000135269.13	9.0732e-11
chr7	115888339	rs6957561	G	A	chr7	115890000	115900000	chr7	116440000	116450000	ENSG00000135269.13	9.0732e-11
chr7	115892650	rs1048508	T	G	chr7	115890000	115900000	chr7	116160000	116170000	ENSG00000135269.13	3.75809e-11
chr7	115892650	rs1048508	T	G	chr7	115890000	115900000	chr7	116440000	116450000	ENSG00000135269.13	3.75809e-11
chr7	115892650	rs1048508	T	G	chr7	115895000	115900000	chr7	116225000	116230000	ENSG00000135269.13	3.75809e-11
chr7	115892650	rs1048508	T	G	chr7	115895000	115900000	chr7	116445000	116450000	ENSG00000135269.13	3.75809e-11
chr7	115892650	rs1048508	T	G	chr7	115895000	115900000	chr7	116450000	116455000	ENSG00000135269.13	3.75809e-11
chr7	115892738	rs17138472	A	G	chr7	115890000	115900000	chr7	116160000	116170000	ENSG00000135269.13	3.75809e-11
chr7	115892738	rs17138472	A	G	chr7	115890000	115900000	chr7	116440000	116450000	ENSG00000135269.13	3.75809e-11
chr7	115892738	rs17138472	A	G	chr7	115895000	115900000	chr7	116225000	116230000	ENSG00000135269.13	3.75809e-11
chr7	115892738	rs17138472	A	G	chr7	115895000	115900000	chr7	116445000	116450000	ENSG00000135269.13	3.75809e-11
chr7	115892738	rs17138472	A	G	chr7	115895000	115900000	chr7	116450000	116455000	ENSG00000135269.13	3.75809e-11
chr7	115893407	rs3823977	A	T	chr7	115890000	115900000	chr7	116160000	116170000	ENSG00000135269.13	1.91881e-11
chr7	115893407	rs3823977	A	T	chr7	115890000	115900000	chr7	116440000	116450000	ENSG00000135269.13	1.91881e-11
chr7	115893407	rs3823977	A	T	chr7	115895000	115900000	chr7	116225000	116230000	ENSG00000135269.13	1.91881e-11
chr7	115893407	rs3823977	A	T	chr7	115895000	115900000	chr7	116445000	116450000	ENSG00000135269.13	1.91881e-11
chr7	115893407	rs3823977	A	T	chr7	115895000	115900000	chr7	116450000	116455000	ENSG00000135269.13	1.91881e-11
chr7	115893647	rs3807980	A	G	chr7	115890000	115900000	chr7	116160000	116170000	ENSG00000135269.13	3.75809e-11
chr7	115893647	rs3807980	A	G	chr7	115890000	115900000	chr7	116440000	116450000	ENSG00000135269.13	3.75809e-11
chr7	115893647	rs3807980	A	G	chr7	115895000	115900000	chr7	116225000	116230000	ENSG00000135269.13	3.75809e-11
chr7	115893647	rs3807980	A	G	chr7	115895000	115900000	chr7	116445000	116450000	ENSG00000135269.13	3.75809e-11
chr7	115893647	rs3807980	A	G	chr7	115895000	115900000	chr7	116450000	116455000	ENSG00000135269.13	3.75809e-11
chr7	115893845	rs17138483	A	C	chr7	115890000	115900000	chr7	116160000	116170000	ENSG00000135269.13	7.392e-12
chr7	115893845	rs17138483	A	C	chr7	115890000	115900000	chr7	116440000	116450000	ENSG00000135269.13	7.392e-12
chr7	115893845	rs17138483	A	C	chr7	115895000	115900000	chr7	116225000	116230000	ENSG00000135269.13	7.392e-12
chr7	115893845	rs17138483	A	C	chr7	115895000	115900000	chr7	116445000	116450000	ENSG00000135269.13	7.392e-12
chr7	115893845	rs17138483	A	C	chr7	115895000	115900000	chr7	116450000	116455000	ENSG00000135269.13	7.392e-12
chr7	115894403	rs17138486	C	G	chr7	115890000	115900000	chr7	116160000	116170000	ENSG00000135269.13	7.392e-12
chr7	115894403	rs17138486	C	G	chr7	115890000	115900000	chr7	116440000	116450000	ENSG00000135269.13	7.392e-12
chr7	115894403	rs17138486	C	G	chr7	115895000	115900000	chr7	116225000	116230000	ENSG00000135269.13	7.392e-12
chr7	115894403	rs17138486	C	G	chr7	115895000	115900000	chr7	116445000	116450000	ENSG00000135269.13	7.392e-12
chr7	115894403	rs17138486	C	G	chr7	115895000	115900000	chr7	116450000	116455000	ENSG00000135269.13	7.392e-12
chr7	115894589	rs112016811	A	T	chr7	115890000	115900000	chr7	116160000	116170000	ENSG00000135269.13	1.39824e-11
chr7	115894589	rs112016811	A	T	chr7	115890000	115900000	chr7	116440000	116450000	ENSG00000135269.13	1.39824e-11
chr7	115894589	rs112016811	A	T	chr7	115895000	115900000	chr7	116225000	116230000	ENSG00000135269.13	1.39824e-11
chr7	115894589	rs112016811	A	T	chr7	115895000	115900000	chr7	116445000	116450000	ENSG00000135269.13	1.39824e-11
chr7	115894589	rs112016811	A	T	chr7	115895000	115900000	chr7	116450000	116455000	ENSG00000135269.13	1.39824e-11
chr7	115895010	rs4730719	G	T	chr7	115890000	115900000	chr7	116160000	116170000	ENSG00000135269.13	1.1616e-11
chr7	115895010	rs4730719	G	T	chr7	115890000	115900000	chr7	116440000	116450000	ENSG00000135269.13	1.1616e-11
chr7	115895010	rs4730719	G	T	chr7	115895000	115900000	chr7	116225000	116230000	ENSG00000135269.13	1.1616e-11
chr7	115895010	rs4730719	G	T	chr7	115895000	115900000	chr7	116445000	116450000	ENSG00000135269.13	1.1616e-11
chr7	115895010	rs4730719	G	T	chr7	115895000	115900000	chr7	116450000	116455000	ENSG00000135269.13	1.1616e-11
chr7	115895235	rs4730720	T	C	chr7	115890000	115900000	chr7	116160000	116170000	ENSG00000135269.13	7.392e-12
chr7	115895235	rs4730720	T	C	chr7	115890000	115900000	chr7	116440000	116450000	ENSG00000135269.13	7.392e-12
chr7	115895235	rs4730720	T	C	chr7	115895000	115900000	chr7	116225000	116230000	ENSG00000135269.13	7.392e-12
chr7	115895235	rs4730720	T	C	chr7	115895000	115900000	chr7	116445000	116450000	ENSG00000135269.13	7.392e-12
chr7	115895235	rs4730720	T	C	chr7	115895000	115900000	chr7	116450000	116455000	ENSG00000135269.13	7.392e-12
chr7	115895433	rs6948556	T	C	chr7	115890000	115900000	chr7	116160000	116170000	ENSG00000135269.13	7.392e-12
chr7	115895433	rs6948556	T	C	chr7	115890000	115900000	chr7	116440000	116450000	ENSG00000135269.13	7.392e-12
chr7	115895433	rs6948556	T	C	chr7	115895000	115900000	chr7	116225000	116230000	ENSG00000135269.13	7.392e-12
chr7	115895433	rs6948556	T	C	chr7	115895000	115900000	chr7	116445000	116450000	ENSG00000135269.13	7.392e-12
chr7	115895433	rs6948556	T	C	chr7	115895000	115900000	chr7	116450000	116455000	ENSG00000135269.13	7.392e-12
chr7	115895718	rs6966770	A	G	chr7	115890000	115900000	chr7	116160000	116170000	ENSG00000135269.13	7.392e-12
chr7	115895718	rs6966770	A	G	chr7	115890000	115900000	chr7	116440000	116450000	ENSG00000135269.13	7.392e-12
chr7	115895718	rs6966770	A	G	chr7	115895000	115900000	chr7	116225000	116230000	ENSG00000135269.13	7.392e-12
chr7	115895718	rs6966770	A	G	chr7	115895000	115900000	chr7	116445000	116450000	ENSG00000135269.13	7.392e-12
chr7	115895718	rs6966770	A	G	chr7	115895000	115900000	chr7	116450000	116455000	ENSG00000135269.13	7.392e-12
chr7	115896049	rs6967695	G	A	chr7	115890000	115900000	chr7	116160000	116170000	ENSG00000135269.13	7.392e-12
chr7	115896049	rs6967695	G	A	chr7	115890000	115900000	chr7	116440000	116450000	ENSG00000135269.13	7.392e-12
chr7	115896049	rs6967695	G	A	chr7	115895000	115900000	chr7	116225000	116230000	ENSG00000135269.13	7.392e-12
chr7	115896049	rs6967695	G	A	chr7	115895000	115900000	chr7	116445000	116450000	ENSG00000135269.13	7.392e-12
chr7	115896049	rs6967695	G	A	chr7	115895000	115900000	chr7	116450000	116455000	ENSG00000135269.13	7.392e-12
chr7	115896716	rs3807981	G	A	chr7	115890000	115900000	chr7	116160000	116170000	ENSG00000135269.13	9.82858e-12
chr7	115896716	rs3807981	G	A	chr7	115890000	115900000	chr7	116440000	116450000	ENSG00000135269.13	9.82858e-12
chr7	115896716	rs3807981	G	A	chr7	115895000	115900000	chr7	116225000	116230000	ENSG00000135269.13	9.82858e-12
chr7	115896716	rs3807981	G	A	chr7	115895000	115900000	chr7	116445000	116450000	ENSG00000135269.13	9.82858e-12
chr7	115896716	rs3807981	G	A	chr7	115895000	115900000	chr7	116450000	116455000	ENSG00000135269.13	9.82858e-12
chr7	115897096	rs2402057	T	C	chr7	115890000	115900000	chr7	116160000	116170000	ENSG00000135269.13	4.88022e-12
chr7	115897096	rs2402057	T	C	chr7	115890000	115900000	chr7	116440000	116450000	ENSG00000135269.13	4.88022e-12
chr7	115897096	rs2402057	T	C	chr7	115895000	115900000	chr7	116225000	116230000	ENSG00000135269.13	4.88022e-12
chr7	115897096	rs2402057	T	C	chr7	115895000	115900000	chr7	116445000	116450000	ENSG00000135269.13	4.88022e-12
chr7	115897096	rs2402057	T	C	chr7	115895000	115900000	chr7	116450000	116455000	ENSG00000135269.13	4.88022e-12
chr7	115897871	rs2896180	A	G	chr7	115890000	115900000	chr7	116160000	116170000	ENSG00000135269.13	6.32055e-12
chr7	115897871	rs2896180	A	G	chr7	115890000	115900000	chr7	116440000	116450000	ENSG00000135269.13	6.32055e-12
chr7	115897871	rs2896180	A	G	chr7	115895000	115900000	chr7	116225000	116230000	ENSG00000135269.13	6.32055e-12
chr7	115897871	rs2896180	A	G	chr7	115895000	115900000	chr7	116445000	116450000	ENSG00000135269.13	6.32055e-12
chr7	115897871	rs2896180	A	G	chr7	115895000	115900000	chr7	116450000	116455000	ENSG00000135269.13	6.32055e-12
chr7	115897884	rs2896181	C	T	chr7	115890000	115900000	chr7	116160000	116170000	ENSG00000135269.13	6.32055e-12
chr7	115897884	rs2896181	C	T	chr7	115890000	115900000	chr7	116440000	116450000	ENSG00000135269.13	6.32055e-12
chr7	115897884	rs2896181	C	T	chr7	115895000	115900000	chr7	116225000	116230000	ENSG00000135269.13	6.32055e-12
chr7	115897884	rs2896181	C	T	chr7	115895000	115900000	chr7	116445000	116450000	ENSG00000135269.13	6.32055e-12
chr7	115897884	rs2896181	C	T	chr7	115895000	115900000	chr7	116450000	116455000	ENSG00000135269.13	6.32055e-12
chr7	115898177	rs3173919	G	C	chr7	115890000	115900000	chr7	116160000	116170000	ENSG00000135269.13	4.70774e-12
chr7	115898177	rs3173919	G	C	chr7	115890000	115900000	chr7	116440000	116450000	ENSG00000135269.13	4.70774e-12
chr7	115898177	rs3173919	G	C	chr7	115895000	115900000	chr7	116225000	116230000	ENSG00000135269.13	4.70774e-12
chr7	115898177	rs3173919	G	C	chr7	115895000	115900000	chr7	116445000	116450000	ENSG00000135269.13	4.70774e-12
chr7	115898177	rs3173919	G	C	chr7	115895000	115900000	chr7	116450000	116455000	ENSG00000135269.13	4.70774e-12
chr7	115898442	rs1141470	G	C	chr7	115890000	115900000	chr7	116160000	116170000	ENSG00000135269.13	7.6994e-12
chr7	115898442	rs1141470	G	C	chr7	115890000	115900000	chr7	116440000	116450000	ENSG00000135269.13	7.6994e-12
chr7	115898442	rs1141470	G	C	chr7	115895000	115900000	chr7	116225000	116230000	ENSG00000135269.13	7.6994e-12
chr7	115898442	rs1141470	G	C	chr7	115895000	115900000	chr7	116445000	116450000	ENSG00000135269.13	7.6994e-12
chr7	115898442	rs1141470	G	C	chr7	115895000	115900000	chr7	116450000	116455000	ENSG00000135269.13	7.6994e-12
chr7	115898885	rs3807982	T	C	chr7	115890000	115900000	chr7	116160000	116170000	ENSG00000135269.13	7.392e-12
chr7	115898885	rs3807982	T	C	chr7	115890000	115900000	chr7	116440000	116450000	ENSG00000135269.13	7.392e-12
chr7	115898885	rs3807982	T	C	chr7	115895000	115900000	chr7	116225000	116230000	ENSG00000135269.13	7.392e-12
chr7	115898885	rs3807982	T	C	chr7	115895000	115900000	chr7	116445000	116450000	ENSG00000135269.13	7.392e-12
chr7	115898885	rs3807982	T	C	chr7	115895000	115900000	chr7	116450000	116455000	ENSG00000135269.13	7.392e-12
chr7	115898991	rs3807983	T	C	chr7	115890000	115900000	chr7	116160000	116170000	ENSG00000135269.13	7.6994e-12
chr7	115898991	rs3807983	T	C	chr7	115890000	115900000	chr7	116440000	116450000	ENSG00000135269.13	7.6994e-12
chr7	115898991	rs3807983	T	C	chr7	115895000	115900000	chr7	116225000	116230000	ENSG00000135269.13	7.6994e-12
chr7	115898991	rs3807983	T	C	chr7	115895000	115900000	chr7	116445000	116450000	ENSG00000135269.13	7.6994e-12
chr7	115898991	rs3807983	T	C	chr7	115895000	115900000	chr7	116450000	116455000	ENSG00000135269.13	7.6994e-12
chr7	115900394	rs10500059	C	T	chr7	115890000	115900000	chr7	116160000	116170000	ENSG00000135269.13	1.53975e-11
chr7	115900394	rs10500059	C	T	chr7	115890000	115900000	chr7	116440000	116450000	ENSG00000135269.13	1.53975e-11
chr7	115900394	rs10500059	C	T	chr7	115895000	115900000	chr7	116225000	116230000	ENSG00000135269.13	1.53975e-11
chr7	115900394	rs10500059	C	T	chr7	115895000	115900000	chr7	116445000	116450000	ENSG00000135269.13	1.53975e-11
chr7	115900394	rs10500059	C	T	chr7	115895000	115900000	chr7	116450000	116455000	ENSG00000135269.13	1.53975e-11
chr7	115900686	rs10500060	C	T	chr7	115890000	115900000	chr7	116160000	116170000	ENSG00000135269.13	2.41897e-11
chr7	115900686	rs10500060	C	T	chr7	115890000	115900000	chr7	116440000	116450000	ENSG00000135269.13	2.41897e-11
chr7	115900686	rs10500060	C	T	chr7	115895000	115900000	chr7	116225000	116230000	ENSG00000135269.13	2.41897e-11
chr7	115900686	rs10500060	C	T	chr7	115895000	115900000	chr7	116445000	116450000	ENSG00000135269.13	2.41897e-11
chr7	115900686	rs10500060	C	T	chr7	115895000	115900000	chr7	116450000	116455000	ENSG00000135269.13	2.41897e-11
chr7	115904052	rs4730723	T	C	chr7	115890000	115900000	chr7	116160000	116170000	ENSG00000135269.13	2.45646e-09
chr7	115904052	rs4730723	T	C	chr7	115890000	115900000	chr7	116440000	116450000	ENSG00000135269.13	2.45646e-09
chr7	115904052	rs4730723	T	C	chr7	115895000	115900000	chr7	116225000	116230000	ENSG00000135269.13	2.45646e-09
chr7	115904052	rs4730723	T	C	chr7	115895000	115900000	chr7	116445000	116450000	ENSG00000135269.13	2.45646e-09
chr7	115904052	rs4730723	T	C	chr7	115895000	115900000	chr7	116450000	116455000	ENSG00000135269.13	2.45646e-09
chr13	44397815	rs9533634	T	C	chr13	44375000	44400000	chr13	43150000	43175000	ENSG00000179630.6	7.86433e-07
chr13	44397815	rs9533634	T	C	chr13	44375000	44400000	chr13	43525000	43550000	ENSG00000179630.6	7.86433e-07
chr13	44397815	rs9533634	T	C	chr13	44375000	44400000	chr13	43650000	43675000	ENSG00000179630.6	7.86433e-07
chr13	44457925	rs3764147	A	G	chr13	44450000	44460000	chr13	43560000	43570000	ENSG00000179630.6	1.00834e-06
Artery_Aorta
Adipose_Subcutaneous
chr2	232058493	rs2368563	A	G	chr2	232055000	232060000	chr2	231970000	231975000	ENSG00000204128.5	4.18425e-07
chr2	232058493	rs2368563	A	G	chr2	232060000	232065000	chr2	231970000	231975000	ENSG00000204128.5	4.18425e-07
chr2	232058493	rs2368563	A	G	chr2	232060000	232070000	chr2	231970000	231980000	ENSG00000204128.5	4.18425e-07
chr2	232060843	rs60664562	T	A	chr2	232055000	232060000	chr2	231970000	231975000	ENSG00000204128.5	2.46609e-07
chr2	232060843	rs60664562	T	A	chr2	232060000	232065000	chr2	231970000	231975000	ENSG00000204128.5	2.46609e-07
chr2	232060843	rs60664562	T	A	chr2	232060000	232070000	chr2	231970000	231980000	ENSG00000204128.5	2.46609e-07
chr2	232061520	rs62197322	A	G	chr2	232055000	232060000	chr2	231970000	231975000	ENSG00000204128.5	1.35588e-07
chr2	232061520	rs62197322	A	G	chr2	232060000	232065000	chr2	231970000	231975000	ENSG00000204128.5	1.35588e-07
chr2	232061520	rs62197322	A	G	chr2	232060000	232070000	chr2	231970000	231980000	ENSG00000204128.5	1.35588e-07
chr5	158706713	rs13153734	C	T	chr5	158700000	158710000	chr5	158590000	158600000	ENSG00000245812.2	1.67476e-05
chr5	158706713	rs13153734	C	T	chr5	158700000	158725000	chr5	158575000	158600000	ENSG00000245812.2	1.67476e-05
chr5	158706713	rs13153734	C	T	chr5	158700000	158725000	chr5	159375000	159400000	ENSG00000245812.2	1.67476e-05
chr5	158706713	rs13153734	C	T	chr5	158710000	158720000	chr5	159820000	159830000	ENSG00000245812.2	1.67476e-05
chr5	158710998	rs35046837	G	A	chr5	158700000	158710000	chr5	158590000	158600000	ENSG00000245812.2	1.61943e-05
chr5	158710998	rs35046837	G	A	chr5	158700000	158725000	chr5	158575000	158600000	ENSG00000245812.2	1.61943e-05
chr5	158710998	rs35046837	G	A	chr5	158700000	158725000	chr5	159375000	159400000	ENSG00000245812.2	1.61943e-05
chr5	158710998	rs35046837	G	A	chr5	158710000	158720000	chr5	159820000	159830000	ENSG00000245812.2	1.61943e-05
chr5	158717068	rs13161132	A	C	chr5	158700000	158725000	chr5	158575000	158600000	ENSG00000245812.2	1.37745e-05
chr5	158717068	rs13161132	A	C	chr5	158700000	158725000	chr5	159375000	159400000	ENSG00000245812.2	1.37745e-05
chr5	158717068	rs13161132	A	C	chr5	158710000	158720000	chr5	159820000	159830000	ENSG00000245812.2	1.37745e-05
chr5	158717994	rs62378747	C	T	chr5	158700000	158725000	chr5	158575000	158600000	ENSG00000245812.2	1.67476e-05
chr5	158717994	rs62378747	C	T	chr5	158700000	158725000	chr5	159375000	159400000	ENSG00000245812.2	1.67476e-05
chr5	158717994	rs62378747	C	T	chr5	158710000	158720000	chr5	159820000	159830000	ENSG00000245812.2	1.67476e-05
chr5	158723293	rs1529710	C	T	chr5	158700000	158725000	chr5	158575000	158600000	ENSG00000245812.2	1.67476e-05
chr5	158723293	rs1529710	C	T	chr5	158700000	158725000	chr5	159375000	159400000	ENSG00000245812.2	1.67476e-05
chr5	158723293	rs1529710	C	T	chr5	158710000	158720000	chr5	159820000	159830000	ENSG00000245812.2	1.67476e-05
chr5	158724949	rs2116820	C	T	chr5	158700000	158725000	chr5	158575000	158600000	ENSG00000245812.2	1.67476e-05
chr5	158724949	rs2116820	C	T	chr5	158700000	158725000	chr5	159375000	159400000	ENSG00000245812.2	1.67476e-05
chr5	158724949	rs2116820	C	T	chr5	158710000	158720000	chr5	159820000	159830000	ENSG00000245812.2	1.67476e-05
chr5	158728642	rs62378748	T	C	chr5	158700000	158725000	chr5	158575000	158600000	ENSG00000245812.2	2.34029e-05
chr5	158728642	rs62378748	T	C	chr5	158700000	158725000	chr5	159375000	159400000	ENSG00000245812.2	2.34029e-05
chr6	32606274	rs113219465	C	T	chr6	32610000	32620000	chr6	45660000	45670000	ENSG00000198502.5	1.04242e-05
chr6	32606274	rs113219465	C	T	chr6	32600000	32625000	chr6	45650000	45675000	ENSG00000198502.5	1.04242e-05
chr6	32608762	rs80154958	T	C	chr6	32610000	32620000	chr6	45660000	45670000	ENSG00000198502.5	7.67288e-06
chr6	32608762	rs80154958	T	C	chr6	32600000	32625000	chr6	45650000	45675000	ENSG00000198502.5	7.67288e-06
chr6	32610310	rs113551974	C	T	chr6	32610000	32620000	chr6	45660000	45670000	ENSG00000198502.5	7.67288e-06
chr6	32610310	rs113551974	C	T	chr6	32600000	32625000	chr6	45650000	45675000	ENSG00000198502.5	7.67288e-06
chr6	32611624	rs73409538	G	T	chr6	32610000	32620000	chr6	45660000	45670000	ENSG00000198502.5	2.08503e-05
chr6	32611624	rs73409538	G	T	chr6	32600000	32625000	chr6	45650000	45675000	ENSG00000198502.5	2.08503e-05
chr6	45886740	rs12665031	C	T	chr6	45890000	45895000	chr6	44435000	44440000	ENSG00000112782.11	5.14859e-05
chr6	45886740	rs12665031	C	T	chr6	45890000	45900000	chr6	44440000	44450000	ENSG00000112782.11	5.14859e-05
chr6	45886740	rs12665031	C	T	chr6	45890000	45895000	chr6	44560000	44565000	ENSG00000112782.11	5.14859e-05
chr6	45886740	rs12665031	C	T	chr6	45890000	45900000	chr6	44600000	44610000	ENSG00000112782.11	5.14859e-05
chr6	45886740	rs12665031	C	T	chr6	45890000	45895000	chr6	44620000	44625000	ENSG00000112782.11	5.14859e-05
chr6	45886740	rs12665031	C	T	chr6	45890000	45900000	chr6	44620000	44630000	ENSG00000112782.11	5.14859e-05
chr6	45886740	rs12665031	C	T	chr6	45890000	45895000	chr6	45385000	45390000	ENSG00000112782.11	5.14859e-05
chr6	45886740	rs12665031	C	T	chr6	45890000	45900000	chr6	45680000	45690000	ENSG00000112782.11	5.14859e-05
chr6	45886740	rs12665031	C	T	chr6	45875000	45900000	chr6	45375000	45400000	ENSG00000112782.11	5.14859e-05
chr6	45887270	rs3777548	G	A	chr6	45890000	45895000	chr6	44435000	44440000	ENSG00000112782.11	5.14859e-05
chr6	45887270	rs3777548	G	A	chr6	45890000	45900000	chr6	44440000	44450000	ENSG00000112782.11	5.14859e-05
chr6	45887270	rs3777548	G	A	chr6	45890000	45895000	chr6	44560000	44565000	ENSG00000112782.11	5.14859e-05
chr6	45887270	rs3777548	G	A	chr6	45890000	45900000	chr6	44600000	44610000	ENSG00000112782.11	5.14859e-05
chr6	45887270	rs3777548	G	A	chr6	45890000	45895000	chr6	44620000	44625000	ENSG00000112782.11	5.14859e-05
chr6	45887270	rs3777548	G	A	chr6	45890000	45900000	chr6	44620000	44630000	ENSG00000112782.11	5.14859e-05
chr6	45887270	rs3777548	G	A	chr6	45890000	45895000	chr6	45385000	45390000	ENSG00000112782.11	5.14859e-05
chr6	45887270	rs3777548	G	A	chr6	45890000	45900000	chr6	45680000	45690000	ENSG00000112782.11	5.14859e-05
chr6	45887270	rs3777548	G	A	chr6	45875000	45900000	chr6	45375000	45400000	ENSG00000112782.11	5.14859e-05
chr6	45887319	rs1361215	C	T	chr6	45890000	45895000	chr6	44435000	44440000	ENSG00000112782.11	5.14859e-05
chr6	45887319	rs1361215	C	T	chr6	45890000	45900000	chr6	44440000	44450000	ENSG00000112782.11	5.14859e-05
chr6	45887319	rs1361215	C	T	chr6	45890000	45895000	chr6	44560000	44565000	ENSG00000112782.11	5.14859e-05
chr6	45887319	rs1361215	C	T	chr6	45890000	45900000	chr6	44600000	44610000	ENSG00000112782.11	5.14859e-05
chr6	45887319	rs1361215	C	T	chr6	45890000	45895000	chr6	44620000	44625000	ENSG00000112782.11	5.14859e-05
chr6	45887319	rs1361215	C	T	chr6	45890000	45900000	chr6	44620000	44630000	ENSG00000112782.11	5.14859e-05
chr6	45887319	rs1361215	C	T	chr6	45890000	45895000	chr6	45385000	45390000	ENSG00000112782.11	5.14859e-05
chr6	45887319	rs1361215	C	T	chr6	45890000	45900000	chr6	45680000	45690000	ENSG00000112782.11	5.14859e-05
chr6	45887319	rs1361215	C	T	chr6	45875000	45900000	chr6	45375000	45400000	ENSG00000112782.11	5.14859e-05
chr6	45887421	rs1416167	A	T	chr6	45890000	45895000	chr6	44435000	44440000	ENSG00000112782.11	2.38156e-05
chr6	45887421	rs1416167	A	T	chr6	45890000	45900000	chr6	44440000	44450000	ENSG00000112782.11	2.38156e-05
chr6	45887421	rs1416167	A	T	chr6	45890000	45895000	chr6	44560000	44565000	ENSG00000112782.11	2.38156e-05
chr6	45887421	rs1416167	A	T	chr6	45890000	45900000	chr6	44600000	44610000	ENSG00000112782.11	2.38156e-05
chr6	45887421	rs1416167	A	T	chr6	45890000	45895000	chr6	44620000	44625000	ENSG00000112782.11	2.38156e-05
chr6	45887421	rs1416167	A	T	chr6	45890000	45900000	chr6	44620000	44630000	ENSG00000112782.11	2.38156e-05
chr6	45887421	rs1416167	A	T	chr6	45890000	45895000	chr6	45385000	45390000	ENSG00000112782.11	2.38156e-05
chr6	45887421	rs1416167	A	T	chr6	45890000	45900000	chr6	45680000	45690000	ENSG00000112782.11	2.38156e-05
chr6	45887421	rs1416167	A	T	chr6	45875000	45900000	chr6	45375000	45400000	ENSG00000112782.11	2.38156e-05
chr6	45887576	rs9369590	T	C	chr6	45890000	45895000	chr6	44435000	44440000	ENSG00000112782.11	5.14859e-05
chr6	45887576	rs9369590	T	C	chr6	45890000	45900000	chr6	44440000	44450000	ENSG00000112782.11	5.14859e-05
chr6	45887576	rs9369590	T	C	chr6	45890000	45895000	chr6	44560000	44565000	ENSG00000112782.11	5.14859e-05
chr6	45887576	rs9369590	T	C	chr6	45890000	45900000	chr6	44600000	44610000	ENSG00000112782.11	5.14859e-05
chr6	45887576	rs9369590	T	C	chr6	45890000	45895000	chr6	44620000	44625000	ENSG00000112782.11	5.14859e-05
chr6	45887576	rs9369590	T	C	chr6	45890000	45900000	chr6	44620000	44630000	ENSG00000112782.11	5.14859e-05
chr6	45887576	rs9369590	T	C	chr6	45890000	45895000	chr6	45385000	45390000	ENSG00000112782.11	5.14859e-05
chr6	45887576	rs9369590	T	C	chr6	45890000	45900000	chr6	45680000	45690000	ENSG00000112782.11	5.14859e-05
chr6	45887576	rs9369590	T	C	chr6	45875000	45900000	chr6	45375000	45400000	ENSG00000112782.11	5.14859e-05
chr6	45887643	rs3822876	G	T	chr6	45890000	45895000	chr6	44435000	44440000	ENSG00000112782.11	5.14859e-05
chr6	45887643	rs3822876	G	T	chr6	45890000	45900000	chr6	44440000	44450000	ENSG00000112782.11	5.14859e-05
chr6	45887643	rs3822876	G	T	chr6	45890000	45895000	chr6	44560000	44565000	ENSG00000112782.11	5.14859e-05
chr6	45887643	rs3822876	G	T	chr6	45890000	45900000	chr6	44600000	44610000	ENSG00000112782.11	5.14859e-05
chr6	45887643	rs3822876	G	T	chr6	45890000	45895000	chr6	44620000	44625000	ENSG00000112782.11	5.14859e-05
chr6	45887643	rs3822876	G	T	chr6	45890000	45900000	chr6	44620000	44630000	ENSG00000112782.11	5.14859e-05
chr6	45887643	rs3822876	G	T	chr6	45890000	45895000	chr6	45385000	45390000	ENSG00000112782.11	5.14859e-05
chr6	45887643	rs3822876	G	T	chr6	45890000	45900000	chr6	45680000	45690000	ENSG00000112782.11	5.14859e-05
chr6	45887643	rs3822876	G	T	chr6	45875000	45900000	chr6	45375000	45400000	ENSG00000112782.11	5.14859e-05
chr6	45887903	rs3822878	G	A	chr6	45890000	45895000	chr6	44435000	44440000	ENSG00000112782.11	5.14859e-05
chr6	45887903	rs3822878	G	A	chr6	45890000	45900000	chr6	44440000	44450000	ENSG00000112782.11	5.14859e-05
chr6	45887903	rs3822878	G	A	chr6	45890000	45895000	chr6	44560000	44565000	ENSG00000112782.11	5.14859e-05
chr6	45887903	rs3822878	G	A	chr6	45890000	45900000	chr6	44600000	44610000	ENSG00000112782.11	5.14859e-05
chr6	45887903	rs3822878	G	A	chr6	45890000	45895000	chr6	44620000	44625000	ENSG00000112782.11	5.14859e-05
chr6	45887903	rs3822878	G	A	chr6	45890000	45900000	chr6	44620000	44630000	ENSG00000112782.11	5.14859e-05
chr6	45887903	rs3822878	G	A	chr6	45890000	45895000	chr6	45385000	45390000	ENSG00000112782.11	5.14859e-05
chr6	45887903	rs3822878	G	A	chr6	45890000	45900000	chr6	45680000	45690000	ENSG00000112782.11	5.14859e-05
chr6	45887903	rs3822878	G	A	chr6	45875000	45900000	chr6	45375000	45400000	ENSG00000112782.11	5.14859e-05
chr6	45887922	rs3822879	A	T	chr6	45890000	45895000	chr6	44435000	44440000	ENSG00000112782.11	5.14859e-05
chr6	45887922	rs3822879	A	T	chr6	45890000	45900000	chr6	44440000	44450000	ENSG00000112782.11	5.14859e-05
chr6	45887922	rs3822879	A	T	chr6	45890000	45895000	chr6	44560000	44565000	ENSG00000112782.11	5.14859e-05
chr6	45887922	rs3822879	A	T	chr6	45890000	45900000	chr6	44600000	44610000	ENSG00000112782.11	5.14859e-05
chr6	45887922	rs3822879	A	T	chr6	45890000	45895000	chr6	44620000	44625000	ENSG00000112782.11	5.14859e-05
chr6	45887922	rs3822879	A	T	chr6	45890000	45900000	chr6	44620000	44630000	ENSG00000112782.11	5.14859e-05
chr6	45887922	rs3822879	A	T	chr6	45890000	45895000	chr6	45385000	45390000	ENSG00000112782.11	5.14859e-05
chr6	45887922	rs3822879	A	T	chr6	45890000	45900000	chr6	45680000	45690000	ENSG00000112782.11	5.14859e-05
chr6	45887922	rs3822879	A	T	chr6	45875000	45900000	chr6	45375000	45400000	ENSG00000112782.11	5.14859e-05
chr6	45887939	rs3822880	C	T	chr6	45890000	45895000	chr6	44435000	44440000	ENSG00000112782.11	5.11206e-05
chr6	45887939	rs3822880	C	T	chr6	45890000	45900000	chr6	44440000	44450000	ENSG00000112782.11	5.11206e-05
chr6	45887939	rs3822880	C	T	chr6	45890000	45895000	chr6	44560000	44565000	ENSG00000112782.11	5.11206e-05
chr6	45887939	rs3822880	C	T	chr6	45890000	45900000	chr6	44600000	44610000	ENSG00000112782.11	5.11206e-05
chr6	45887939	rs3822880	C	T	chr6	45890000	45895000	chr6	44620000	44625000	ENSG00000112782.11	5.11206e-05
chr6	45887939	rs3822880	C	T	chr6	45890000	45900000	chr6	44620000	44630000	ENSG00000112782.11	5.11206e-05
chr6	45887939	rs3822880	C	T	chr6	45890000	45895000	chr6	45385000	45390000	ENSG00000112782.11	5.11206e-05
chr6	45887939	rs3822880	C	T	chr6	45890000	45900000	chr6	45680000	45690000	ENSG00000112782.11	5.11206e-05
chr6	45887939	rs3822880	C	T	chr6	45875000	45900000	chr6	45375000	45400000	ENSG00000112782.11	5.11206e-05
chr6	45888022	rs3822881	A	T	chr6	45890000	45895000	chr6	44435000	44440000	ENSG00000112782.11	5.14859e-05
chr6	45888022	rs3822881	A	T	chr6	45890000	45900000	chr6	44440000	44450000	ENSG00000112782.11	5.14859e-05
chr6	45888022	rs3822881	A	T	chr6	45890000	45895000	chr6	44560000	44565000	ENSG00000112782.11	5.14859e-05
chr6	45888022	rs3822881	A	T	chr6	45890000	45900000	chr6	44600000	44610000	ENSG00000112782.11	5.14859e-05
chr6	45888022	rs3822881	A	T	chr6	45890000	45895000	chr6	44620000	44625000	ENSG00000112782.11	5.14859e-05
chr6	45888022	rs3822881	A	T	chr6	45890000	45900000	chr6	44620000	44630000	ENSG00000112782.11	5.14859e-05
chr6	45888022	rs3822881	A	T	chr6	45890000	45895000	chr6	45385000	45390000	ENSG00000112782.11	5.14859e-05
chr6	45888022	rs3822881	A	T	chr6	45890000	45900000	chr6	45680000	45690000	ENSG00000112782.11	5.14859e-05
chr6	45888022	rs3822881	A	T	chr6	45875000	45900000	chr6	45375000	45400000	ENSG00000112782.11	5.14859e-05
chr6	45888073	rs3729618	A	G	chr6	45890000	45895000	chr6	44435000	44440000	ENSG00000112782.11	5.14859e-05
chr6	45888073	rs3729618	A	G	chr6	45890000	45900000	chr6	44440000	44450000	ENSG00000112782.11	5.14859e-05
chr6	45888073	rs3729618	A	G	chr6	45890000	45895000	chr6	44560000	44565000	ENSG00000112782.11	5.14859e-05
chr6	45888073	rs3729618	A	G	chr6	45890000	45900000	chr6	44600000	44610000	ENSG00000112782.11	5.14859e-05
chr6	45888073	rs3729618	A	G	chr6	45890000	45895000	chr6	44620000	44625000	ENSG00000112782.11	5.14859e-05
chr6	45888073	rs3729618	A	G	chr6	45890000	45900000	chr6	44620000	44630000	ENSG00000112782.11	5.14859e-05
chr6	45888073	rs3729618	A	G	chr6	45890000	45895000	chr6	45385000	45390000	ENSG00000112782.11	5.14859e-05
chr6	45888073	rs3729618	A	G	chr6	45890000	45900000	chr6	45680000	45690000	ENSG00000112782.11	5.14859e-05
chr6	45888073	rs3729618	A	G	chr6	45875000	45900000	chr6	45375000	45400000	ENSG00000112782.11	5.14859e-05
chr6	45889793	rs12204991	A	T	chr6	45890000	45895000	chr6	44435000	44440000	ENSG00000112782.11	3.51278e-05
chr6	45889793	rs12204991	A	T	chr6	45890000	45900000	chr6	44440000	44450000	ENSG00000112782.11	3.51278e-05
chr6	45889793	rs12204991	A	T	chr6	45890000	45895000	chr6	44560000	44565000	ENSG00000112782.11	3.51278e-05
chr6	45889793	rs12204991	A	T	chr6	45890000	45900000	chr6	44600000	44610000	ENSG00000112782.11	3.51278e-05
chr6	45889793	rs12204991	A	T	chr6	45890000	45895000	chr6	44620000	44625000	ENSG00000112782.11	3.51278e-05
chr6	45889793	rs12204991	A	T	chr6	45890000	45900000	chr6	44620000	44630000	ENSG00000112782.11	3.51278e-05
chr6	45889793	rs12204991	A	T	chr6	45890000	45895000	chr6	45385000	45390000	ENSG00000112782.11	3.51278e-05
chr6	45889793	rs12204991	A	T	chr6	45890000	45900000	chr6	45680000	45690000	ENSG00000112782.11	3.51278e-05
chr6	45889793	rs12204991	A	T	chr6	45875000	45900000	chr6	45375000	45400000	ENSG00000112782.11	3.51278e-05
chr6	45892487	rs9367229	T	C	chr6	45895000	45900000	chr6	46375000	46380000	ENSG00000112782.11	3.53831e-05
chr6	45892487	rs9367229	T	C	chr6	45890000	45895000	chr6	44435000	44440000	ENSG00000112782.11	3.53831e-05
chr6	45892487	rs9367229	T	C	chr6	45890000	45900000	chr6	44440000	44450000	ENSG00000112782.11	3.53831e-05
chr6	45892487	rs9367229	T	C	chr6	45890000	45895000	chr6	44560000	44565000	ENSG00000112782.11	3.53831e-05
chr6	45892487	rs9367229	T	C	chr6	45890000	45900000	chr6	44600000	44610000	ENSG00000112782.11	3.53831e-05
chr6	45892487	rs9367229	T	C	chr6	45890000	45895000	chr6	44620000	44625000	ENSG00000112782.11	3.53831e-05
chr6	45892487	rs9367229	T	C	chr6	45890000	45900000	chr6	44620000	44630000	ENSG00000112782.11	3.53831e-05
chr6	45892487	rs9367229	T	C	chr6	45890000	45895000	chr6	45385000	45390000	ENSG00000112782.11	3.53831e-05
chr6	45892487	rs9367229	T	C	chr6	45890000	45900000	chr6	45680000	45690000	ENSG00000112782.11	3.53831e-05
chr6	45892487	rs9367229	T	C	chr6	45875000	45900000	chr6	45375000	45400000	ENSG00000112782.11	3.53831e-05
chr7	26702506	rs757129	C	G	chr7	26700000	26725000	chr7	26100000	26125000	ENSG00000122592.6	2.6823e-05
chr7	26702506	rs757129	C	G	chr7	26700000	26710000	chr7	26130000	26140000	ENSG00000122592.6	2.6823e-05
chr7	26702506	rs757129	C	G	chr7	26700000	26725000	chr7	26225000	26250000	ENSG00000122592.6	2.6823e-05
chr7	26702506	rs757129	C	G	chr7	26705000	26710000	chr7	25930000	25935000	ENSG00000122592.6	2.6823e-05
chr7	26702506	rs757129	C	G	chr7	26705000	26710000	chr7	26405000	26410000	ENSG00000122592.6	2.6823e-05
chr7	26702506	rs757129	C	G	chr7	26705000	26710000	chr7	26410000	26415000	ENSG00000122592.6	2.6823e-05
chr7	115897222	rs2402058	A	G	chr7	115890000	115900000	chr7	116160000	116170000	ENSG00000237870.2	6.55552e-06
chr7	115897222	rs2402058	A	G	chr7	115890000	115900000	chr7	116440000	116450000	ENSG00000237870.2	6.55552e-06
chr7	115897222	rs2402058	A	G	chr7	115895000	115900000	chr7	116225000	116230000	ENSG00000237870.2	6.55552e-06
chr7	115897222	rs2402058	A	G	chr7	115895000	115900000	chr7	116445000	116450000	ENSG00000237870.2	6.55552e-06
chr7	115897222	rs2402058	A	G	chr7	115895000	115900000	chr7	116450000	116455000	ENSG00000237870.2	6.55552e-06
chr7	115897242	rs2402059	T	G	chr7	115890000	115900000	chr7	116160000	116170000	ENSG00000237870.2	6.55552e-06
chr7	115897242	rs2402059	T	G	chr7	115890000	115900000	chr7	116440000	116450000	ENSG00000237870.2	6.55552e-06
chr7	115897242	rs2402059	T	G	chr7	115895000	115900000	chr7	116225000	116230000	ENSG00000237870.2	6.55552e-06
chr7	115897242	rs2402059	T	G	chr7	115895000	115900000	chr7	116445000	116450000	ENSG00000237870.2	6.55552e-06
chr7	115897242	rs2402059	T	G	chr7	115895000	115900000	chr7	116450000	116455000	ENSG00000237870.2	6.55552e-06
chr7	115899335	rs4730721	T	A	chr7	115890000	115900000	chr7	116160000	116170000	ENSG00000237870.2	8.33831e-06
chr7	115899335	rs4730721	T	A	chr7	115890000	115900000	chr7	116440000	116450000	ENSG00000237870.2	8.33831e-06
chr7	115899335	rs4730721	T	A	chr7	115895000	115900000	chr7	116225000	116230000	ENSG00000237870.2	8.33831e-06
chr7	115899335	rs4730721	T	A	chr7	115895000	115900000	chr7	116445000	116450000	ENSG00000237870.2	8.33831e-06
chr7	115899335	rs4730721	T	A	chr7	115895000	115900000	chr7	116450000	116455000	ENSG00000237870.2	8.33831e-06
chr7	115900262	rs10242959	C	T	chr7	115890000	115900000	chr7	116160000	116170000	ENSG00000237870.2	4.85148e-06
chr7	115900262	rs10242959	C	T	chr7	115890000	115900000	chr7	116440000	116450000	ENSG00000237870.2	4.85148e-06
chr7	115900262	rs10242959	C	T	chr7	115895000	115900000	chr7	116225000	116230000	ENSG00000237870.2	4.85148e-06
chr7	115900262	rs10242959	C	T	chr7	115895000	115900000	chr7	116445000	116450000	ENSG00000237870.2	4.85148e-06
chr7	115900262	rs10242959	C	T	chr7	115895000	115900000	chr7	116450000	116455000	ENSG00000237870.2	4.85148e-06
chr7	115900353	rs10261531	T	A	chr7	115890000	115900000	chr7	116160000	116170000	ENSG00000237870.2	5.07857e-06
chr7	115900353	rs10261531	T	A	chr7	115890000	115900000	chr7	116440000	116450000	ENSG00000237870.2	5.07857e-06
chr7	115900353	rs10261531	T	A	chr7	115895000	115900000	chr7	116225000	116230000	ENSG00000237870.2	5.07857e-06
chr7	115900353	rs10261531	T	A	chr7	115895000	115900000	chr7	116445000	116450000	ENSG00000237870.2	5.07857e-06
chr7	115900353	rs10261531	T	A	chr7	115895000	115900000	chr7	116450000	116455000	ENSG00000237870.2	5.07857e-06
chr7	115900724	rs10500061	C	G	chr7	115890000	115900000	chr7	116160000	116170000	ENSG00000237870.2	4.93285e-06
chr7	115900724	rs10500061	C	G	chr7	115890000	115900000	chr7	116440000	116450000	ENSG00000237870.2	4.93285e-06
chr7	115900724	rs10500061	C	G	chr7	115895000	115900000	chr7	116225000	116230000	ENSG00000237870.2	4.93285e-06
chr7	115900724	rs10500061	C	G	chr7	115895000	115900000	chr7	116445000	116450000	ENSG00000237870.2	4.93285e-06
chr7	115900724	rs10500061	C	G	chr7	115895000	115900000	chr7	116450000	116455000	ENSG00000237870.2	4.93285e-06
chr7	115900820	rs60927526	T	G	chr7	115890000	115900000	chr7	116160000	116170000	ENSG00000237870.2	8.08256e-06
chr7	115900820	rs60927526	T	G	chr7	115890000	115900000	chr7	116440000	116450000	ENSG00000237870.2	8.08256e-06
chr7	115900820	rs60927526	T	G	chr7	115895000	115900000	chr7	116225000	116230000	ENSG00000237870.2	8.08256e-06
chr7	115900820	rs60927526	T	G	chr7	115895000	115900000	chr7	116445000	116450000	ENSG00000237870.2	8.08256e-06
chr7	115900820	rs60927526	T	G	chr7	115895000	115900000	chr7	116450000	116455000	ENSG00000237870.2	8.08256e-06
chr11	64129722	rs538147	G	A	chr11	64130000	64140000	chr11	64410000	64420000	ENSG00000236935.1	2.06215e-05
chr11	64412891	rs11820322	C	T	chr11	64410000	64420000	chr11	64130000	64140000	ENSG00000110076.14	1.76616e-05
chr11	64412891	rs11820322	C	T	chr11	64410000	64420000	chr11	64320000	64330000	ENSG00000110076.14	1.76616e-05
chr14	96030442	rs7152619	T	C	chr14	96030000	96040000	chr14	96460000	96470000	ENSG00000182512.4	9.34469e-06
chr14	96030442	rs7152619	T	C	chr14	96020000	96030000	chr14	96460000	96470000	ENSG00000182512.4	9.34469e-06
chr14	96030442	rs7152619	T	C	chr14	96025000	96030000	chr14	96460000	96465000	ENSG00000182512.4	9.34469e-06
chr14	96030763	rs8014367	C	T	chr14	96030000	96040000	chr14	96460000	96470000	ENSG00000182512.4	1.68764e-05
chr14	96030763	rs8014367	C	T	chr14	96020000	96030000	chr14	96460000	96470000	ENSG00000182512.4	1.68764e-05
chr14	96030763	rs8014367	C	T	chr14	96025000	96030000	chr14	96460000	96465000	ENSG00000182512.4	1.68764e-05
chr14	96031957	rs9323929	C	T	chr14	96030000	96040000	chr14	96460000	96470000	ENSG00000182512.4	2.0606e-05
chr14	96031957	rs9323929	C	T	chr14	96020000	96030000	chr14	96460000	96470000	ENSG00000182512.4	2.0606e-05
chr14	96031957	rs9323929	C	T	chr14	96025000	96030000	chr14	96460000	96465000	ENSG00000182512.4	2.0606e-05
chr20	13786587	rs6079180	A	G	chr20	13790000	13800000	chr20	14030000	14040000	ENSG00000101247.13	8.06001e-28
Adipose_Visceral_Omentum
chr2	232058493	rs2368563	A	G	chr2	232055000	232060000	chr2	231970000	231975000	ENSG00000204128.5	2.23288e-08
chr2	232058493	rs2368563	A	G	chr2	232060000	232065000	chr2	231970000	231975000	ENSG00000204128.5	2.23288e-08
chr2	232058493	rs2368563	A	G	chr2	232060000	232070000	chr2	231970000	231980000	ENSG00000204128.5	2.23288e-08
chr2	232060843	rs60664562	T	A	chr2	232055000	232060000	chr2	231970000	231975000	ENSG00000204128.5	6.29418e-09
chr2	232060843	rs60664562	T	A	chr2	232060000	232065000	chr2	231970000	231975000	ENSG00000204128.5	6.29418e-09
chr2	232060843	rs60664562	T	A	chr2	232060000	232070000	chr2	231970000	231980000	ENSG00000204128.5	6.29418e-09
chr2	232061520	rs62197322	A	G	chr2	232055000	232060000	chr2	231970000	231975000	ENSG00000204128.5	1.5487e-08
chr2	232061520	rs62197322	A	G	chr2	232060000	232065000	chr2	231970000	231975000	ENSG00000204128.5	1.5487e-08
chr2	232061520	rs62197322	A	G	chr2	232060000	232070000	chr2	231970000	231980000	ENSG00000204128.5	1.5487e-08
chr6	32606274	rs113219465	C	T	chr6	32610000	32620000	chr6	45660000	45670000	ENSG00000198502.5	7.66474e-06
chr6	32606274	rs113219465	C	T	chr6	32600000	32625000	chr6	45650000	45675000	ENSG00000198502.5	7.66474e-06
chr6	32608762	rs80154958	T	C	chr6	32610000	32620000	chr6	45660000	45670000	ENSG00000198502.5	5.85733e-06
chr6	32608762	rs80154958	T	C	chr6	32600000	32625000	chr6	45650000	45675000	ENSG00000198502.5	5.85733e-06
chr6	32610310	rs113551974	C	T	chr6	32610000	32620000	chr6	45660000	45670000	ENSG00000198502.5	5.85733e-06
chr6	32610310	rs113551974	C	T	chr6	32600000	32625000	chr6	45650000	45675000	ENSG00000198502.5	5.85733e-06
chr6	32611624	rs73409538	G	T	chr6	32610000	32620000	chr6	45660000	45670000	ENSG00000198502.5	5.85733e-06
chr6	32611624	rs73409538	G	T	chr6	32600000	32625000	chr6	45650000	45675000	ENSG00000198502.5	5.85733e-06
chr6	32629931	rs41542812	C	G	chr6	32600000	32625000	chr6	45650000	45675000	ENSG00000198502.5	1.38236e-05
chr7	115860783	rs1004107	A	T	chr7	115865000	115870000	chr7	115830000	115835000	ENSG00000135269.13	4.85512e-05
chr7	115861660	rs9969224	T	C	chr7	115865000	115870000	chr7	115830000	115835000	ENSG00000135269.13	4.85512e-05
chr7	115862902	rs1000966	A	G	chr7	115865000	115870000	chr7	115830000	115835000	ENSG00000135269.13	4.85512e-05
chr7	115863446	rs3807968	G	A	chr7	115865000	115870000	chr7	115830000	115835000	ENSG00000135269.13	4.85512e-05
chr7	115880277	rs3807975	G	A	chr7	115870000	115880000	chr7	115810000	115820000	ENSG00000135269.13	4.66283e-05
chr7	115880277	rs3807975	G	A	chr7	115875000	115880000	chr7	115815000	115820000	ENSG00000135269.13	4.66283e-05
chr7	115881159	rs66652906	G	A	chr7	115870000	115880000	chr7	115810000	115820000	ENSG00000135269.13	3.99571e-05
chr7	115881159	rs66652906	G	A	chr7	115875000	115880000	chr7	115815000	115820000	ENSG00000135269.13	3.99571e-05
chr7	115881458	rs58595078	A	G	chr7	115870000	115880000	chr7	115810000	115820000	ENSG00000135269.13	4.85512e-05
chr7	115881458	rs58595078	A	G	chr7	115875000	115880000	chr7	115815000	115820000	ENSG00000135269.13	4.85512e-05
chr7	115892650	rs1048508	T	G	chr7	115890000	115900000	chr7	116160000	116170000	ENSG00000135269.13	4.28575e-05
chr7	115892650	rs1048508	T	G	chr7	115890000	115900000	chr7	116440000	116450000	ENSG00000135269.13	4.28575e-05
chr7	115892650	rs1048508	T	G	chr7	115895000	115900000	chr7	116225000	116230000	ENSG00000135269.13	4.28575e-05
chr7	115892650	rs1048508	T	G	chr7	115895000	115900000	chr7	116445000	116450000	ENSG00000135269.13	4.28575e-05
chr7	115892650	rs1048508	T	G	chr7	115895000	115900000	chr7	116450000	116455000	ENSG00000135269.13	4.28575e-05
chr7	115892738	rs17138472	A	G	chr7	115890000	115900000	chr7	116160000	116170000	ENSG00000135269.13	4.19706e-05
chr7	115892738	rs17138472	A	G	chr7	115890000	115900000	chr7	116440000	116450000	ENSG00000135269.13	4.19706e-05
chr7	115892738	rs17138472	A	G	chr7	115895000	115900000	chr7	116225000	116230000	ENSG00000135269.13	4.19706e-05
chr7	115892738	rs17138472	A	G	chr7	115895000	115900000	chr7	116445000	116450000	ENSG00000135269.13	4.19706e-05
chr7	115892738	rs17138472	A	G	chr7	115895000	115900000	chr7	116450000	116455000	ENSG00000135269.13	4.19706e-05
chr7	115893647	rs3807980	A	G	chr7	115890000	115900000	chr7	116160000	116170000	ENSG00000135269.13	4.28575e-05
chr7	115893647	rs3807980	A	G	chr7	115890000	115900000	chr7	116440000	116450000	ENSG00000135269.13	4.28575e-05
chr7	115893647	rs3807980	A	G	chr7	115895000	115900000	chr7	116225000	116230000	ENSG00000135269.13	4.28575e-05
chr7	115893647	rs3807980	A	G	chr7	115895000	115900000	chr7	116445000	116450000	ENSG00000135269.13	4.28575e-05
chr7	115893647	rs3807980	A	G	chr7	115895000	115900000	chr7	116450000	116455000	ENSG00000135269.13	4.28575e-05
chr7	115894403	rs17138486	C	G	chr7	115890000	115900000	chr7	116160000	116170000	ENSG00000135269.13	4.42024e-05
chr7	115894403	rs17138486	C	G	chr7	115890000	115900000	chr7	116440000	116450000	ENSG00000135269.13	4.42024e-05
chr7	115894403	rs17138486	C	G	chr7	115895000	115900000	chr7	116225000	116230000	ENSG00000135269.13	4.42024e-05
chr7	115894403	rs17138486	C	G	chr7	115895000	115900000	chr7	116445000	116450000	ENSG00000135269.13	4.42024e-05
chr7	115894403	rs17138486	C	G	chr7	115895000	115900000	chr7	116450000	116455000	ENSG00000135269.13	4.42024e-05
chr7	115897871	rs2896180	A	G	chr7	115890000	115900000	chr7	116160000	116170000	ENSG00000135269.13	4.70289e-05
chr7	115897871	rs2896180	A	G	chr7	115890000	115900000	chr7	116440000	116450000	ENSG00000135269.13	4.70289e-05
chr7	115897871	rs2896180	A	G	chr7	115895000	115900000	chr7	116225000	116230000	ENSG00000135269.13	4.70289e-05
chr7	115897871	rs2896180	A	G	chr7	115895000	115900000	chr7	116445000	116450000	ENSG00000135269.13	4.70289e-05
chr7	115897871	rs2896180	A	G	chr7	115895000	115900000	chr7	116450000	116455000	ENSG00000135269.13	4.70289e-05
chr7	115897884	rs2896181	C	T	chr7	115890000	115900000	chr7	116160000	116170000	ENSG00000135269.13	4.70289e-05
chr7	115897884	rs2896181	C	T	chr7	115890000	115900000	chr7	116440000	116450000	ENSG00000135269.13	4.70289e-05
chr7	115897884	rs2896181	C	T	chr7	115895000	115900000	chr7	116225000	116230000	ENSG00000135269.13	4.70289e-05
chr7	115897884	rs2896181	C	T	chr7	115895000	115900000	chr7	116445000	116450000	ENSG00000135269.13	4.70289e-05
chr7	115897884	rs2896181	C	T	chr7	115895000	115900000	chr7	116450000	116455000	ENSG00000135269.13	4.70289e-05
chr7	115900686	rs10500060	C	T	chr7	115890000	115900000	chr7	116160000	116170000	ENSG00000135269.13	4.27114e-05
chr7	115900686	rs10500060	C	T	chr7	115890000	115900000	chr7	116440000	116450000	ENSG00000135269.13	4.27114e-05
chr7	115900686	rs10500060	C	T	chr7	115895000	115900000	chr7	116225000	116230000	ENSG00000135269.13	4.27114e-05
chr7	115900686	rs10500060	C	T	chr7	115895000	115900000	chr7	116445000	116450000	ENSG00000135269.13	4.27114e-05
chr7	115900686	rs10500060	C	T	chr7	115895000	115900000	chr7	116450000	116455000	ENSG00000135269.13	4.27114e-05
chr11	64129722	rs538147	G	A	chr11	64130000	64140000	chr11	64410000	64420000	ENSG00000236935.1	7.0337e-07
chr13	44397815	rs9533634	T	C	chr13	44375000	44400000	chr13	43150000	43175000	ENSG00000151773.8	3.16032e-09
chr13	44397815	rs9533634	T	C	chr13	44375000	44400000	chr13	43525000	43550000	ENSG00000151773.8	3.16032e-09
chr13	44397815	rs9533634	T	C	chr13	44375000	44400000	chr13	43650000	43675000	ENSG00000151773.8	3.16032e-09
chr13	44457925	rs3764147	A	G	chr13	44450000	44460000	chr13	43560000	43570000	ENSG00000151773.8	1.8577e-08
chr14	90858484	rs7150626	C	T	chr14	90850000	90860000	chr14	90420000	90430000	ENSG00000198668.6	2.64288e-06
chr14	90858484	rs7150626	C	T	chr14	90860000	90870000	chr14	91220000	91230000	ENSG00000198668.6	2.64288e-06
chr16	57452165	rs188872	A	G	chr16	57445000	57450000	chr16	57335000	57340000	ENSG00000005194.10	1.92362e-07
chr16	57452165	rs188872	A	G	chr16	57450000	57460000	chr16	57550000	57560000	ENSG00000005194.10	1.92362e-07
chr16	57452165	rs188872	A	G	chr16	57455000	57460000	chr16	57335000	57340000	ENSG00000005194.10	1.92362e-07
chr20	13786587	rs6079180	A	G	chr20	13790000	13800000	chr20	14030000	14040000	ENSG00000101247.13	1.17488e-12
AdreTl_Gland
chr7	115860783	rs1004107	A	T	chr7	115865000	115870000	chr7	115830000	115835000	ENSG00000135269.13	1.00525e-10
chr7	115861660	rs9969224	T	C	chr7	115865000	115870000	chr7	115830000	115835000	ENSG00000135269.13	1.00525e-10
chr7	115862296	rs1004109	A	T	chr7	115865000	115870000	chr7	115830000	115835000	ENSG00000135269.13	9.40764e-11
chr7	115862902	rs1000966	A	G	chr7	115865000	115870000	chr7	115830000	115835000	ENSG00000135269.13	1.40716e-10
chr7	115863446	rs3807968	G	A	chr7	115865000	115870000	chr7	115830000	115835000	ENSG00000135269.13	1.00525e-10
chr7	115864889	rs3779509	C	A	chr7	115865000	115870000	chr7	115830000	115835000	ENSG00000135269.13	9.0732e-11
chr7	115866354	rs1881287	A	G	chr7	115870000	115880000	chr7	115810000	115820000	ENSG00000135269.13	9.0732e-11
chr7	115866354	rs1881287	A	G	chr7	115865000	115870000	chr7	115830000	115835000	ENSG00000135269.13	9.0732e-11
chr7	115868798	rs58624059	T	C	chr7	115870000	115880000	chr7	115810000	115820000	ENSG00000135269.13	5.19595e-11
chr7	115868798	rs58624059	T	C	chr7	115865000	115870000	chr7	115830000	115835000	ENSG00000135269.13	5.19595e-11
chr7	115874466	rs12670683	T	C	chr7	115870000	115880000	chr7	115810000	115820000	ENSG00000135269.13	9.26489e-11
chr7	115874466	rs12670683	T	C	chr7	115875000	115880000	chr7	115815000	115820000	ENSG00000135269.13	9.26489e-11
chr7	115874466	rs12670683	T	C	chr7	115865000	115870000	chr7	115830000	115835000	ENSG00000135269.13	9.26489e-11
chr7	115874560	rs2030978	C	T	chr7	115870000	115880000	chr7	115810000	115820000	ENSG00000135269.13	9.0732e-11
chr7	115874560	rs2030978	C	T	chr7	115875000	115880000	chr7	115815000	115820000	ENSG00000135269.13	9.0732e-11
chr7	115874560	rs2030978	C	T	chr7	115865000	115870000	chr7	115830000	115835000	ENSG00000135269.13	9.0732e-11
chr7	115875359	rs2030977	G	C	chr7	115870000	115880000	chr7	115810000	115820000	ENSG00000135269.13	9.0732e-11
chr7	115875359	rs2030977	G	C	chr7	115875000	115880000	chr7	115815000	115820000	ENSG00000135269.13	9.0732e-11
chr7	115876365	rs6959237	C	T	chr7	115870000	115880000	chr7	115810000	115820000	ENSG00000135269.13	9.0732e-11
chr7	115876365	rs6959237	C	T	chr7	115875000	115880000	chr7	115815000	115820000	ENSG00000135269.13	9.0732e-11
chr7	115880277	rs3807975	G	A	chr7	115870000	115880000	chr7	115810000	115820000	ENSG00000135269.13	9.0732e-11
chr7	115880277	rs3807975	G	A	chr7	115875000	115880000	chr7	115815000	115820000	ENSG00000135269.13	9.0732e-11
chr7	115881159	rs66652906	G	A	chr7	115870000	115880000	chr7	115810000	115820000	ENSG00000135269.13	9.52337e-11
chr7	115881159	rs66652906	G	A	chr7	115875000	115880000	chr7	115815000	115820000	ENSG00000135269.13	9.52337e-11
chr7	115881458	rs58595078	A	G	chr7	115870000	115880000	chr7	115810000	115820000	ENSG00000135269.13	1.00525e-10
chr7	115881458	rs58595078	A	G	chr7	115875000	115880000	chr7	115815000	115820000	ENSG00000135269.13	1.00525e-10
chr7	115882323	rs3757730	G	A	chr7	115870000	115880000	chr7	115810000	115820000	ENSG00000135269.13	9.0732e-11
chr7	115882323	rs3757730	G	A	chr7	115875000	115880000	chr7	115815000	115820000	ENSG00000135269.13	9.0732e-11
chr7	115883453	rs57321537	T	G	chr7	115870000	115880000	chr7	115810000	115820000	ENSG00000135269.13	1.12157e-10
chr7	115883453	rs57321537	T	G	chr7	115875000	115880000	chr7	115815000	115820000	ENSG00000135269.13	1.12157e-10
chr7	115884319	rs138623810	C	A	chr7	115870000	115880000	chr7	115810000	115820000	ENSG00000135269.13	9.0732e-11
chr7	115884319	rs138623810	C	A	chr7	115875000	115880000	chr7	115815000	115820000	ENSG00000135269.13	9.0732e-11
chr7	115886079	rs7811984	A	G	chr7	115890000	115900000	chr7	116160000	116170000	ENSG00000135269.13	9.0732e-11
chr7	115886079	rs7811984	A	G	chr7	115890000	115900000	chr7	116440000	116450000	ENSG00000135269.13	9.0732e-11
chr7	115888162	rs6953050	A	G	chr7	115890000	115900000	chr7	116160000	116170000	ENSG00000135269.13	9.0732e-11
chr7	115888162	rs6953050	A	G	chr7	115890000	115900000	chr7	116440000	116450000	ENSG00000135269.13	9.0732e-11
chr7	115888339	rs6957561	G	A	chr7	115890000	115900000	chr7	116160000	116170000	ENSG00000135269.13	9.0732e-11
chr7	115888339	rs6957561	G	A	chr7	115890000	115900000	chr7	116440000	116450000	ENSG00000135269.13	9.0732e-11
chr7	115892650	rs1048508	T	G	chr7	115890000	115900000	chr7	116160000	116170000	ENSG00000135269.13	3.75809e-11
chr7	115892650	rs1048508	T	G	chr7	115890000	115900000	chr7	116440000	116450000	ENSG00000135269.13	3.75809e-11
chr7	115892650	rs1048508	T	G	chr7	115895000	115900000	chr7	116225000	116230000	ENSG00000135269.13	3.75809e-11
chr7	115892650	rs1048508	T	G	chr7	115895000	115900000	chr7	116445000	116450000	ENSG00000135269.13	3.75809e-11
chr7	115892650	rs1048508	T	G	chr7	115895000	115900000	chr7	116450000	116455000	ENSG00000135269.13	3.75809e-11
chr7	115892738	rs17138472	A	G	chr7	115890000	115900000	chr7	116160000	116170000	ENSG00000135269.13	3.75809e-11
chr7	115892738	rs17138472	A	G	chr7	115890000	115900000	chr7	116440000	116450000	ENSG00000135269.13	3.75809e-11
chr7	115892738	rs17138472	A	G	chr7	115895000	115900000	chr7	116225000	116230000	ENSG00000135269.13	3.75809e-11
chr7	115892738	rs17138472	A	G	chr7	115895000	115900000	chr7	116445000	116450000	ENSG00000135269.13	3.75809e-11
chr7	115892738	rs17138472	A	G	chr7	115895000	115900000	chr7	116450000	116455000	ENSG00000135269.13	3.75809e-11
chr7	115893407	rs3823977	A	T	chr7	115890000	115900000	chr7	116160000	116170000	ENSG00000135269.13	1.91881e-11
chr7	115893407	rs3823977	A	T	chr7	115890000	115900000	chr7	116440000	116450000	ENSG00000135269.13	1.91881e-11
chr7	115893407	rs3823977	A	T	chr7	115895000	115900000	chr7	116225000	116230000	ENSG00000135269.13	1.91881e-11
chr7	115893407	rs3823977	A	T	chr7	115895000	115900000	chr7	116445000	116450000	ENSG00000135269.13	1.91881e-11
chr7	115893407	rs3823977	A	T	chr7	115895000	115900000	chr7	116450000	116455000	ENSG00000135269.13	1.91881e-11
chr7	115893647	rs3807980	A	G	chr7	115890000	115900000	chr7	116160000	116170000	ENSG00000135269.13	3.75809e-11
chr7	115893647	rs3807980	A	G	chr7	115890000	115900000	chr7	116440000	116450000	ENSG00000135269.13	3.75809e-11
chr7	115893647	rs3807980	A	G	chr7	115895000	115900000	chr7	116225000	116230000	ENSG00000135269.13	3.75809e-11
chr7	115893647	rs3807980	A	G	chr7	115895000	115900000	chr7	116445000	116450000	ENSG00000135269.13	3.75809e-11
chr7	115893647	rs3807980	A	G	chr7	115895000	115900000	chr7	116450000	116455000	ENSG00000135269.13	3.75809e-11
chr7	115893845	rs17138483	A	C	chr7	115890000	115900000	chr7	116160000	116170000	ENSG00000135269.13	7.392e-12
chr7	115893845	rs17138483	A	C	chr7	115890000	115900000	chr7	116440000	116450000	ENSG00000135269.13	7.392e-12
chr7	115893845	rs17138483	A	C	chr7	115895000	115900000	chr7	116225000	116230000	ENSG00000135269.13	7.392e-12
chr7	115893845	rs17138483	A	C	chr7	115895000	115900000	chr7	116445000	116450000	ENSG00000135269.13	7.392e-12
chr7	115893845	rs17138483	A	C	chr7	115895000	115900000	chr7	116450000	116455000	ENSG00000135269.13	7.392e-12
chr7	115894403	rs17138486	C	G	chr7	115890000	115900000	chr7	116160000	116170000	ENSG00000135269.13	7.392e-12
chr7	115894403	rs17138486	C	G	chr7	115890000	115900000	chr7	116440000	116450000	ENSG00000135269.13	7.392e-12
chr7	115894403	rs17138486	C	G	chr7	115895000	115900000	chr7	116225000	116230000	ENSG00000135269.13	7.392e-12
chr7	115894403	rs17138486	C	G	chr7	115895000	115900000	chr7	116445000	116450000	ENSG00000135269.13	7.392e-12
chr7	115894403	rs17138486	C	G	chr7	115895000	115900000	chr7	116450000	116455000	ENSG00000135269.13	7.392e-12
chr7	115894589	rs112016811	A	T	chr7	115890000	115900000	chr7	116160000	116170000	ENSG00000135269.13	1.39824e-11
chr7	115894589	rs112016811	A	T	chr7	115890000	115900000	chr7	116440000	116450000	ENSG00000135269.13	1.39824e-11
chr7	115894589	rs112016811	A	T	chr7	115895000	115900000	chr7	116225000	116230000	ENSG00000135269.13	1.39824e-11
chr7	115894589	rs112016811	A	T	chr7	115895000	115900000	chr7	116445000	116450000	ENSG00000135269.13	1.39824e-11
chr7	115894589	rs112016811	A	T	chr7	115895000	115900000	chr7	116450000	116455000	ENSG00000135269.13	1.39824e-11
chr7	115895010	rs4730719	G	T	chr7	115890000	115900000	chr7	116160000	116170000	ENSG00000135269.13	1.1616e-11
chr7	115895010	rs4730719	G	T	chr7	115890000	115900000	chr7	116440000	116450000	ENSG00000135269.13	1.1616e-11
chr7	115895010	rs4730719	G	T	chr7	115895000	115900000	chr7	116225000	116230000	ENSG00000135269.13	1.1616e-11
chr7	115895010	rs4730719	G	T	chr7	115895000	115900000	chr7	116445000	116450000	ENSG00000135269.13	1.1616e-11
chr7	115895010	rs4730719	G	T	chr7	115895000	115900000	chr7	116450000	116455000	ENSG00000135269.13	1.1616e-11
chr7	115895235	rs4730720	T	C	chr7	115890000	115900000	chr7	116160000	116170000	ENSG00000135269.13	7.392e-12
chr7	115895235	rs4730720	T	C	chr7	115890000	115900000	chr7	116440000	116450000	ENSG00000135269.13	7.392e-12
chr7	115895235	rs4730720	T	C	chr7	115895000	115900000	chr7	116225000	116230000	ENSG00000135269.13	7.392e-12
chr7	115895235	rs4730720	T	C	chr7	115895000	115900000	chr7	116445000	116450000	ENSG00000135269.13	7.392e-12
chr7	115895235	rs4730720	T	C	chr7	115895000	115900000	chr7	116450000	116455000	ENSG00000135269.13	7.392e-12
chr7	115895433	rs6948556	T	C	chr7	115890000	115900000	chr7	116160000	116170000	ENSG00000135269.13	7.392e-12
chr7	115895433	rs6948556	T	C	chr7	115890000	115900000	chr7	116440000	116450000	ENSG00000135269.13	7.392e-12
chr7	115895433	rs6948556	T	C	chr7	115895000	115900000	chr7	116225000	116230000	ENSG00000135269.13	7.392e-12
chr7	115895433	rs6948556	T	C	chr7	115895000	115900000	chr7	116445000	116450000	ENSG00000135269.13	7.392e-12
chr7	115895433	rs6948556	T	C	chr7	115895000	115900000	chr7	116450000	116455000	ENSG00000135269.13	7.392e-12
chr7	115895718	rs6966770	A	G	chr7	115890000	115900000	chr7	116160000	116170000	ENSG00000135269.13	7.392e-12
chr7	115895718	rs6966770	A	G	chr7	115890000	115900000	chr7	116440000	116450000	ENSG00000135269.13	7.392e-12
chr7	115895718	rs6966770	A	G	chr7	115895000	115900000	chr7	116225000	116230000	ENSG00000135269.13	7.392e-12
chr7	115895718	rs6966770	A	G	chr7	115895000	115900000	chr7	116445000	116450000	ENSG00000135269.13	7.392e-12
chr7	115895718	rs6966770	A	G	chr7	115895000	115900000	chr7	116450000	116455000	ENSG00000135269.13	7.392e-12
chr7	115896049	rs6967695	G	A	chr7	115890000	115900000	chr7	116160000	116170000	ENSG00000135269.13	7.392e-12
chr7	115896049	rs6967695	G	A	chr7	115890000	115900000	chr7	116440000	116450000	ENSG00000135269.13	7.392e-12
chr7	115896049	rs6967695	G	A	chr7	115895000	115900000	chr7	116225000	116230000	ENSG00000135269.13	7.392e-12
chr7	115896049	rs6967695	G	A	chr7	115895000	115900000	chr7	116445000	116450000	ENSG00000135269.13	7.392e-12
chr7	115896049	rs6967695	G	A	chr7	115895000	115900000	chr7	116450000	116455000	ENSG00000135269.13	7.392e-12
chr7	115896716	rs3807981	G	A	chr7	115890000	115900000	chr7	116160000	116170000	ENSG00000135269.13	9.82858e-12
chr7	115896716	rs3807981	G	A	chr7	115890000	115900000	chr7	116440000	116450000	ENSG00000135269.13	9.82858e-12
chr7	115896716	rs3807981	G	A	chr7	115895000	115900000	chr7	116225000	116230000	ENSG00000135269.13	9.82858e-12
chr7	115896716	rs3807981	G	A	chr7	115895000	115900000	chr7	116445000	116450000	ENSG00000135269.13	9.82858e-12
chr7	115896716	rs3807981	G	A	chr7	115895000	115900000	chr7	116450000	116455000	ENSG00000135269.13	9.82858e-12
chr7	115897096	rs2402057	T	C	chr7	115890000	115900000	chr7	116160000	116170000	ENSG00000135269.13	4.88022e-12
chr7	115897096	rs2402057	T	C	chr7	115890000	115900000	chr7	116440000	116450000	ENSG00000135269.13	4.88022e-12
chr7	115897096	rs2402057	T	C	chr7	115895000	115900000	chr7	116225000	116230000	ENSG00000135269.13	4.88022e-12
chr7	115897096	rs2402057	T	C	chr7	115895000	115900000	chr7	116445000	116450000	ENSG00000135269.13	4.88022e-12
chr7	115897096	rs2402057	T	C	chr7	115895000	115900000	chr7	116450000	116455000	ENSG00000135269.13	4.88022e-12
chr7	115897871	rs2896180	A	G	chr7	115890000	115900000	chr7	116160000	116170000	ENSG00000135269.13	6.32055e-12
chr7	115897871	rs2896180	A	G	chr7	115890000	115900000	chr7	116440000	116450000	ENSG00000135269.13	6.32055e-12
chr7	115897871	rs2896180	A	G	chr7	115895000	115900000	chr7	116225000	116230000	ENSG00000135269.13	6.32055e-12
chr7	115897871	rs2896180	A	G	chr7	115895000	115900000	chr7	116445000	116450000	ENSG00000135269.13	6.32055e-12
chr7	115897871	rs2896180	A	G	chr7	115895000	115900000	chr7	116450000	116455000	ENSG00000135269.13	6.32055e-12
chr7	115897884	rs2896181	C	T	chr7	115890000	115900000	chr7	116160000	116170000	ENSG00000135269.13	6.32055e-12
chr7	115897884	rs2896181	C	T	chr7	115890000	115900000	chr7	116440000	116450000	ENSG00000135269.13	6.32055e-12
chr7	115897884	rs2896181	C	T	chr7	115895000	115900000	chr7	116225000	116230000	ENSG00000135269.13	6.32055e-12
chr7	115897884	rs2896181	C	T	chr7	115895000	115900000	chr7	116445000	116450000	ENSG00000135269.13	6.32055e-12
chr7	115897884	rs2896181	C	T	chr7	115895000	115900000	chr7	116450000	116455000	ENSG00000135269.13	6.32055e-12
chr7	115898177	rs3173919	G	C	chr7	115890000	115900000	chr7	116160000	116170000	ENSG00000135269.13	4.70774e-12
chr7	115898177	rs3173919	G	C	chr7	115890000	115900000	chr7	116440000	116450000	ENSG00000135269.13	4.70774e-12
chr7	115898177	rs3173919	G	C	chr7	115895000	115900000	chr7	116225000	116230000	ENSG00000135269.13	4.70774e-12
chr7	115898177	rs3173919	G	C	chr7	115895000	115900000	chr7	116445000	116450000	ENSG00000135269.13	4.70774e-12
chr7	115898177	rs3173919	G	C	chr7	115895000	115900000	chr7	116450000	116455000	ENSG00000135269.13	4.70774e-12
chr7	115898442	rs1141470	G	C	chr7	115890000	115900000	chr7	116160000	116170000	ENSG00000135269.13	7.6994e-12
chr7	115898442	rs1141470	G	C	chr7	115890000	115900000	chr7	116440000	116450000	ENSG00000135269.13	7.6994e-12
chr7	115898442	rs1141470	G	C	chr7	115895000	115900000	chr7	116225000	116230000	ENSG00000135269.13	7.6994e-12
chr7	115898442	rs1141470	G	C	chr7	115895000	115900000	chr7	116445000	116450000	ENSG00000135269.13	7.6994e-12
chr7	115898442	rs1141470	G	C	chr7	115895000	115900000	chr7	116450000	116455000	ENSG00000135269.13	7.6994e-12
chr7	115898885	rs3807982	T	C	chr7	115890000	115900000	chr7	116160000	116170000	ENSG00000135269.13	7.392e-12
chr7	115898885	rs3807982	T	C	chr7	115890000	115900000	chr7	116440000	116450000	ENSG00000135269.13	7.392e-12
chr7	115898885	rs3807982	T	C	chr7	115895000	115900000	chr7	116225000	116230000	ENSG00000135269.13	7.392e-12
chr7	115898885	rs3807982	T	C	chr7	115895000	115900000	chr7	116445000	116450000	ENSG00000135269.13	7.392e-12
chr7	115898885	rs3807982	T	C	chr7	115895000	115900000	chr7	116450000	116455000	ENSG00000135269.13	7.392e-12
chr7	115898991	rs3807983	T	C	chr7	115890000	115900000	chr7	116160000	116170000	ENSG00000135269.13	7.6994e-12
chr7	115898991	rs3807983	T	C	chr7	115890000	115900000	chr7	116440000	116450000	ENSG00000135269.13	7.6994e-12
chr7	115898991	rs3807983	T	C	chr7	115895000	115900000	chr7	116225000	116230000	ENSG00000135269.13	7.6994e-12
chr7	115898991	rs3807983	T	C	chr7	115895000	115900000	chr7	116445000	116450000	ENSG00000135269.13	7.6994e-12
chr7	115898991	rs3807983	T	C	chr7	115895000	115900000	chr7	116450000	116455000	ENSG00000135269.13	7.6994e-12
chr7	115900394	rs10500059	C	T	chr7	115890000	115900000	chr7	116160000	116170000	ENSG00000135269.13	1.53975e-11
chr7	115900394	rs10500059	C	T	chr7	115890000	115900000	chr7	116440000	116450000	ENSG00000135269.13	1.53975e-11
chr7	115900394	rs10500059	C	T	chr7	115895000	115900000	chr7	116225000	116230000	ENSG00000135269.13	1.53975e-11
chr7	115900394	rs10500059	C	T	chr7	115895000	115900000	chr7	116445000	116450000	ENSG00000135269.13	1.53975e-11
chr7	115900394	rs10500059	C	T	chr7	115895000	115900000	chr7	116450000	116455000	ENSG00000135269.13	1.53975e-11
chr7	115900686	rs10500060	C	T	chr7	115890000	115900000	chr7	116160000	116170000	ENSG00000135269.13	2.41897e-11
chr7	115900686	rs10500060	C	T	chr7	115890000	115900000	chr7	116440000	116450000	ENSG00000135269.13	2.41897e-11
chr7	115900686	rs10500060	C	T	chr7	115895000	115900000	chr7	116225000	116230000	ENSG00000135269.13	2.41897e-11
chr7	115900686	rs10500060	C	T	chr7	115895000	115900000	chr7	116445000	116450000	ENSG00000135269.13	2.41897e-11
chr7	115900686	rs10500060	C	T	chr7	115895000	115900000	chr7	116450000	116455000	ENSG00000135269.13	2.41897e-11
chr7	115904052	rs4730723	T	C	chr7	115890000	115900000	chr7	116160000	116170000	ENSG00000135269.13	2.45646e-09
chr7	115904052	rs4730723	T	C	chr7	115890000	115900000	chr7	116440000	116450000	ENSG00000135269.13	2.45646e-09
chr7	115904052	rs4730723	T	C	chr7	115895000	115900000	chr7	116225000	116230000	ENSG00000135269.13	2.45646e-09
chr7	115904052	rs4730723	T	C	chr7	115895000	115900000	chr7	116445000	116450000	ENSG00000135269.13	2.45646e-09
chr7	115904052	rs4730723	T	C	chr7	115895000	115900000	chr7	116450000	116455000	ENSG00000135269.13	2.45646e-09
chr13	44397815	rs9533634	T	C	chr13	44375000	44400000	chr13	43150000	43175000	ENSG00000179630.6	7.86433e-07
chr13	44397815	rs9533634	T	C	chr13	44375000	44400000	chr13	43525000	43550000	ENSG00000179630.6	7.86433e-07
chr13	44397815	rs9533634	T	C	chr13	44375000	44400000	chr13	43650000	43675000	ENSG00000179630.6	7.86433e-07
chr13	44457925	rs3764147	A	G	chr13	44450000	44460000	chr13	43560000	43570000	ENSG00000179630.6	1.00834e-06
Artery_Aorta
Adipose_Subcutaneous
chr2	232058493	rs2368563	A	G	chr2	232055000	232060000	chr2	231970000	231975000	ENSG00000204128.5	4.18425e-07
chr2	232058493	rs2368563	A	G	chr2	232060000	232065000	chr2	231970000	231975000	ENSG00000204128.5	4.18425e-07
chr2	232058493	rs2368563	A	G	chr2	232060000	232070000	chr2	231970000	231980000	ENSG00000204128.5	4.18425e-07
chr2	232060843	rs60664562	T	A	chr2	232055000	232060000	chr2	231970000	231975000	ENSG00000204128.5	2.46609e-07
chr2	232060843	rs60664562	T	A	chr2	232060000	232065000	chr2	231970000	231975000	ENSG00000204128.5	2.46609e-07
chr2	232060843	rs60664562	T	A	chr2	232060000	232070000	chr2	231970000	231980000	ENSG00000204128.5	2.46609e-07
chr2	232061520	rs62197322	A	G	chr2	232055000	232060000	chr2	231970000	231975000	ENSG00000204128.5	1.35588e-07
chr2	232061520	rs62197322	A	G	chr2	232060000	232065000	chr2	231970000	231975000	ENSG00000204128.5	1.35588e-07
chr2	232061520	rs62197322	A	G	chr2	232060000	232070000	chr2	231970000	231980000	ENSG00000204128.5	1.35588e-07
chr5	158706713	rs13153734	C	T	chr5	158700000	158710000	chr5	158590000	158600000	ENSG00000245812.2	1.67476e-05
chr5	158706713	rs13153734	C	T	chr5	158700000	158725000	chr5	158575000	158600000	ENSG00000245812.2	1.67476e-05
chr5	158706713	rs13153734	C	T	chr5	158700000	158725000	chr5	159375000	159400000	ENSG00000245812.2	1.67476e-05
chr5	158706713	rs13153734	C	T	chr5	158710000	158720000	chr5	159820000	159830000	ENSG00000245812.2	1.67476e-05
chr5	158710998	rs35046837	G	A	chr5	158700000	158710000	chr5	158590000	158600000	ENSG00000245812.2	1.61943e-05
chr5	158710998	rs35046837	G	A	chr5	158700000	158725000	chr5	158575000	158600000	ENSG00000245812.2	1.61943e-05
chr5	158710998	rs35046837	G	A	chr5	158700000	158725000	chr5	159375000	159400000	ENSG00000245812.2	1.61943e-05
chr5	158710998	rs35046837	G	A	chr5	158710000	158720000	chr5	159820000	159830000	ENSG00000245812.2	1.61943e-05
chr5	158717068	rs13161132	A	C	chr5	158700000	158725000	chr5	158575000	158600000	ENSG00000245812.2	1.37745e-05
chr5	158717068	rs13161132	A	C	chr5	158700000	158725000	chr5	159375000	159400000	ENSG00000245812.2	1.37745e-05
chr5	158717068	rs13161132	A	C	chr5	158710000	158720000	chr5	159820000	159830000	ENSG00000245812.2	1.37745e-05
chr5	158717994	rs62378747	C	T	chr5	158700000	158725000	chr5	158575000	158600000	ENSG00000245812.2	1.67476e-05
chr5	158717994	rs62378747	C	T	chr5	158700000	158725000	chr5	159375000	159400000	ENSG00000245812.2	1.67476e-05
chr5	158717994	rs62378747	C	T	chr5	158710000	158720000	chr5	159820000	159830000	ENSG00000245812.2	1.67476e-05
chr5	158723293	rs1529710	C	T	chr5	158700000	158725000	chr5	158575000	158600000	ENSG00000245812.2	1.67476e-05
chr5	158723293	rs1529710	C	T	chr5	158700000	158725000	chr5	159375000	159400000	ENSG00000245812.2	1.67476e-05
chr5	158723293	rs1529710	C	T	chr5	158710000	158720000	chr5	159820000	159830000	ENSG00000245812.2	1.67476e-05
chr5	158724949	rs2116820	C	T	chr5	158700000	158725000	chr5	158575000	158600000	ENSG00000245812.2	1.67476e-05
chr5	158724949	rs2116820	C	T	chr5	158700000	158725000	chr5	159375000	159400000	ENSG00000245812.2	1.67476e-05
chr5	158724949	rs2116820	C	T	chr5	158710000	158720000	chr5	159820000	159830000	ENSG00000245812.2	1.67476e-05
chr5	158728642	rs62378748	T	C	chr5	158700000	158725000	chr5	158575000	158600000	ENSG00000245812.2	2.34029e-05
chr5	158728642	rs62378748	T	C	chr5	158700000	158725000	chr5	159375000	159400000	ENSG00000245812.2	2.34029e-05
chr6	32606274	rs113219465	C	T	chr6	32610000	32620000	chr6	45660000	45670000	ENSG00000198502.5	1.04242e-05
chr6	32606274	rs113219465	C	T	chr6	32600000	32625000	chr6	45650000	45675000	ENSG00000198502.5	1.04242e-05
chr6	32608762	rs80154958	T	C	chr6	32610000	32620000	chr6	45660000	45670000	ENSG00000198502.5	7.67288e-06
chr6	32608762	rs80154958	T	C	chr6	32600000	32625000	chr6	45650000	45675000	ENSG00000198502.5	7.67288e-06
chr6	32610310	rs113551974	C	T	chr6	32610000	32620000	chr6	45660000	45670000	ENSG00000198502.5	7.67288e-06
chr6	32610310	rs113551974	C	T	chr6	32600000	32625000	chr6	45650000	45675000	ENSG00000198502.5	7.67288e-06
chr6	32611624	rs73409538	G	T	chr6	32610000	32620000	chr6	45660000	45670000	ENSG00000198502.5	2.08503e-05
chr6	32611624	rs73409538	G	T	chr6	32600000	32625000	chr6	45650000	45675000	ENSG00000198502.5	2.08503e-05
chr6	45886740	rs12665031	C	T	chr6	45890000	45895000	chr6	44435000	44440000	ENSG00000112782.11	5.14859e-05
chr6	45886740	rs12665031	C	T	chr6	45890000	45900000	chr6	44440000	44450000	ENSG00000112782.11	5.14859e-05
chr6	45886740	rs12665031	C	T	chr6	45890000	45895000	chr6	44560000	44565000	ENSG00000112782.11	5.14859e-05
chr6	45886740	rs12665031	C	T	chr6	45890000	45900000	chr6	44600000	44610000	ENSG00000112782.11	5.14859e-05
chr6	45886740	rs12665031	C	T	chr6	45890000	45895000	chr6	44620000	44625000	ENSG00000112782.11	5.14859e-05
chr6	45886740	rs12665031	C	T	chr6	45890000	45900000	chr6	44620000	44630000	ENSG00000112782.11	5.14859e-05
chr6	45886740	rs12665031	C	T	chr6	45890000	45895000	chr6	45385000	45390000	ENSG00000112782.11	5.14859e-05
chr6	45886740	rs12665031	C	T	chr6	45890000	45900000	chr6	45680000	45690000	ENSG00000112782.11	5.14859e-05
chr6	45886740	rs12665031	C	T	chr6	45875000	45900000	chr6	45375000	45400000	ENSG00000112782.11	5.14859e-05
chr6	45887270	rs3777548	G	A	chr6	45890000	45895000	chr6	44435000	44440000	ENSG00000112782.11	5.14859e-05
chr6	45887270	rs3777548	G	A	chr6	45890000	45900000	chr6	44440000	44450000	ENSG00000112782.11	5.14859e-05
chr6	45887270	rs3777548	G	A	chr6	45890000	45895000	chr6	44560000	44565000	ENSG00000112782.11	5.14859e-05
chr6	45887270	rs3777548	G	A	chr6	45890000	45900000	chr6	44600000	44610000	ENSG00000112782.11	5.14859e-05
chr6	45887270	rs3777548	G	A	chr6	45890000	45895000	chr6	44620000	44625000	ENSG00000112782.11	5.14859e-05
chr6	45887270	rs3777548	G	A	chr6	45890000	45900000	chr6	44620000	44630000	ENSG00000112782.11	5.14859e-05
chr6	45887270	rs3777548	G	A	chr6	45890000	45895000	chr6	45385000	45390000	ENSG00000112782.11	5.14859e-05
chr6	45887270	rs3777548	G	A	chr6	45890000	45900000	chr6	45680000	45690000	ENSG00000112782.11	5.14859e-05
chr6	45887270	rs3777548	G	A	chr6	45875000	45900000	chr6	45375000	45400000	ENSG00000112782.11	5.14859e-05
chr6	45887319	rs1361215	C	T	chr6	45890000	45895000	chr6	44435000	44440000	ENSG00000112782.11	5.14859e-05
chr6	45887319	rs1361215	C	T	chr6	45890000	45900000	chr6	44440000	44450000	ENSG00000112782.11	5.14859e-05
chr6	45887319	rs1361215	C	T	chr6	45890000	45895000	chr6	44560000	44565000	ENSG00000112782.11	5.14859e-05
chr6	45887319	rs1361215	C	T	chr6	45890000	45900000	chr6	44600000	44610000	ENSG00000112782.11	5.14859e-05
chr6	45887319	rs1361215	C	T	chr6	45890000	45895000	chr6	44620000	44625000	ENSG00000112782.11	5.14859e-05
chr6	45887319	rs1361215	C	T	chr6	45890000	45900000	chr6	44620000	44630000	ENSG00000112782.11	5.14859e-05
chr6	45887319	rs1361215	C	T	chr6	45890000	45895000	chr6	45385000	45390000	ENSG00000112782.11	5.14859e-05
chr6	45887319	rs1361215	C	T	chr6	45890000	45900000	chr6	45680000	45690000	ENSG00000112782.11	5.14859e-05
chr6	45887319	rs1361215	C	T	chr6	45875000	45900000	chr6	45375000	45400000	ENSG00000112782.11	5.14859e-05
chr6	45887421	rs1416167	A	T	chr6	45890000	45895000	chr6	44435000	44440000	ENSG00000112782.11	2.38156e-05
chr6	45887421	rs1416167	A	T	chr6	45890000	45900000	chr6	44440000	44450000	ENSG00000112782.11	2.38156e-05
chr6	45887421	rs1416167	A	T	chr6	45890000	45895000	chr6	44560000	44565000	ENSG00000112782.11	2.38156e-05
chr6	45887421	rs1416167	A	T	chr6	45890000	45900000	chr6	44600000	44610000	ENSG00000112782.11	2.38156e-05
chr6	45887421	rs1416167	A	T	chr6	45890000	45895000	chr6	44620000	44625000	ENSG00000112782.11	2.38156e-05
chr6	45887421	rs1416167	A	T	chr6	45890000	45900000	chr6	44620000	44630000	ENSG00000112782.11	2.38156e-05
chr6	45887421	rs1416167	A	T	chr6	45890000	45895000	chr6	45385000	45390000	ENSG00000112782.11	2.38156e-05
chr6	45887421	rs1416167	A	T	chr6	45890000	45900000	chr6	45680000	45690000	ENSG00000112782.11	2.38156e-05
chr6	45887421	rs1416167	A	T	chr6	45875000	45900000	chr6	45375000	45400000	ENSG00000112782.11	2.38156e-05
chr6	45887576	rs9369590	T	C	chr6	45890000	45895000	chr6	44435000	44440000	ENSG00000112782.11	5.14859e-05
chr6	45887576	rs9369590	T	C	chr6	45890000	45900000	chr6	44440000	44450000	ENSG00000112782.11	5.14859e-05
chr6	45887576	rs9369590	T	C	chr6	45890000	45895000	chr6	44560000	44565000	ENSG00000112782.11	5.14859e-05
chr6	45887576	rs9369590	T	C	chr6	45890000	45900000	chr6	44600000	44610000	ENSG00000112782.11	5.14859e-05
chr6	45887576	rs9369590	T	C	chr6	45890000	45895000	chr6	44620000	44625000	ENSG00000112782.11	5.14859e-05
chr6	45887576	rs9369590	T	C	chr6	45890000	45900000	chr6	44620000	44630000	ENSG00000112782.11	5.14859e-05
chr6	45887576	rs9369590	T	C	chr6	45890000	45895000	chr6	45385000	45390000	ENSG00000112782.11	5.14859e-05
chr6	45887576	rs9369590	T	C	chr6	45890000	45900000	chr6	45680000	45690000	ENSG00000112782.11	5.14859e-05
chr6	45887576	rs9369590	T	C	chr6	45875000	45900000	chr6	45375000	45400000	ENSG00000112782.11	5.14859e-05
chr6	45887643	rs3822876	G	T	chr6	45890000	45895000	chr6	44435000	44440000	ENSG00000112782.11	5.14859e-05
chr6	45887643	rs3822876	G	T	chr6	45890000	45900000	chr6	44440000	44450000	ENSG00000112782.11	5.14859e-05
chr6	45887643	rs3822876	G	T	chr6	45890000	45895000	chr6	44560000	44565000	ENSG00000112782.11	5.14859e-05
chr6	45887643	rs3822876	G	T	chr6	45890000	45900000	chr6	44600000	44610000	ENSG00000112782.11	5.14859e-05
chr6	45887643	rs3822876	G	T	chr6	45890000	45895000	chr6	44620000	44625000	ENSG00000112782.11	5.14859e-05
chr6	45887643	rs3822876	G	T	chr6	45890000	45900000	chr6	44620000	44630000	ENSG00000112782.11	5.14859e-05
chr6	45887643	rs3822876	G	T	chr6	45890000	45895000	chr6	45385000	45390000	ENSG00000112782.11	5.14859e-05
chr6	45887643	rs3822876	G	T	chr6	45890000	45900000	chr6	45680000	45690000	ENSG00000112782.11	5.14859e-05
chr6	45887643	rs3822876	G	T	chr6	45875000	45900000	chr6	45375000	45400000	ENSG00000112782.11	5.14859e-05
chr6	45887903	rs3822878	G	A	chr6	45890000	45895000	chr6	44435000	44440000	ENSG00000112782.11	5.14859e-05
chr6	45887903	rs3822878	G	A	chr6	45890000	45900000	chr6	44440000	44450000	ENSG00000112782.11	5.14859e-05
chr6	45887903	rs3822878	G	A	chr6	45890000	45895000	chr6	44560000	44565000	ENSG00000112782.11	5.14859e-05
chr6	45887903	rs3822878	G	A	chr6	45890000	45900000	chr6	44600000	44610000	ENSG00000112782.11	5.14859e-05
chr6	45887903	rs3822878	G	A	chr6	45890000	45895000	chr6	44620000	44625000	ENSG00000112782.11	5.14859e-05
chr6	45887903	rs3822878	G	A	chr6	45890000	45900000	chr6	44620000	44630000	ENSG00000112782.11	5.14859e-05
chr6	45887903	rs3822878	G	A	chr6	45890000	45895000	chr6	45385000	45390000	ENSG00000112782.11	5.14859e-05
chr6	45887903	rs3822878	G	A	chr6	45890000	45900000	chr6	45680000	45690000	ENSG00000112782.11	5.14859e-05
chr6	45887903	rs3822878	G	A	chr6	45875000	45900000	chr6	45375000	45400000	ENSG00000112782.11	5.14859e-05
chr6	45887922	rs3822879	A	T	chr6	45890000	45895000	chr6	44435000	44440000	ENSG00000112782.11	5.14859e-05
chr6	45887922	rs3822879	A	T	chr6	45890000	45900000	chr6	44440000	44450000	ENSG00000112782.11	5.14859e-05
chr6	45887922	rs3822879	A	T	chr6	45890000	45895000	chr6	44560000	44565000	ENSG00000112782.11	5.14859e-05
chr6	45887922	rs3822879	A	T	chr6	45890000	45900000	chr6	44600000	44610000	ENSG00000112782.11	5.14859e-05
chr6	45887922	rs3822879	A	T	chr6	45890000	45895000	chr6	44620000	44625000	ENSG00000112782.11	5.14859e-05
chr6	45887922	rs3822879	A	T	chr6	45890000	45900000	chr6	44620000	44630000	ENSG00000112782.11	5.14859e-05
chr6	45887922	rs3822879	A	T	chr6	45890000	45895000	chr6	45385000	45390000	ENSG00000112782.11	5.14859e-05
chr6	45887922	rs3822879	A	T	chr6	45890000	45900000	chr6	45680000	45690000	ENSG00000112782.11	5.14859e-05
chr6	45887922	rs3822879	A	T	chr6	45875000	45900000	chr6	45375000	45400000	ENSG00000112782.11	5.14859e-05
chr6	45887939	rs3822880	C	T	chr6	45890000	45895000	chr6	44435000	44440000	ENSG00000112782.11	5.11206e-05
chr6	45887939	rs3822880	C	T	chr6	45890000	45900000	chr6	44440000	44450000	ENSG00000112782.11	5.11206e-05
chr6	45887939	rs3822880	C	T	chr6	45890000	45895000	chr6	44560000	44565000	ENSG00000112782.11	5.11206e-05
chr6	45887939	rs3822880	C	T	chr6	45890000	45900000	chr6	44600000	44610000	ENSG00000112782.11	5.11206e-05
chr6	45887939	rs3822880	C	T	chr6	45890000	45895000	chr6	44620000	44625000	ENSG00000112782.11	5.11206e-05
chr6	45887939	rs3822880	C	T	chr6	45890000	45900000	chr6	44620000	44630000	ENSG00000112782.11	5.11206e-05
chr6	45887939	rs3822880	C	T	chr6	45890000	45895000	chr6	45385000	45390000	ENSG00000112782.11	5.11206e-05
chr6	45887939	rs3822880	C	T	chr6	45890000	45900000	chr6	45680000	45690000	ENSG00000112782.11	5.11206e-05
chr6	45887939	rs3822880	C	T	chr6	45875000	45900000	chr6	45375000	45400000	ENSG00000112782.11	5.11206e-05
chr6	45888022	rs3822881	A	T	chr6	45890000	45895000	chr6	44435000	44440000	ENSG00000112782.11	5.14859e-05
chr6	45888022	rs3822881	A	T	chr6	45890000	45900000	chr6	44440000	44450000	ENSG00000112782.11	5.14859e-05
chr6	45888022	rs3822881	A	T	chr6	45890000	45895000	chr6	44560000	44565000	ENSG00000112782.11	5.14859e-05
chr6	45888022	rs3822881	A	T	chr6	45890000	45900000	chr6	44600000	44610000	ENSG00000112782.11	5.14859e-05
chr6	45888022	rs3822881	A	T	chr6	45890000	45895000	chr6	44620000	44625000	ENSG00000112782.11	5.14859e-05
chr6	45888022	rs3822881	A	T	chr6	45890000	45900000	chr6	44620000	44630000	ENSG00000112782.11	5.14859e-05
chr6	45888022	rs3822881	A	T	chr6	45890000	45895000	chr6	45385000	45390000	ENSG00000112782.11	5.14859e-05
chr6	45888022	rs3822881	A	T	chr6	45890000	45900000	chr6	45680000	45690000	ENSG00000112782.11	5.14859e-05
chr6	45888022	rs3822881	A	T	chr6	45875000	45900000	chr6	45375000	45400000	ENSG00000112782.11	5.14859e-05
chr6	45888073	rs3729618	A	G	chr6	45890000	45895000	chr6	44435000	44440000	ENSG00000112782.11	5.14859e-05
chr6	45888073	rs3729618	A	G	chr6	45890000	45900000	chr6	44440000	44450000	ENSG00000112782.11	5.14859e-05
chr6	45888073	rs3729618	A	G	chr6	45890000	45895000	chr6	44560000	44565000	ENSG00000112782.11	5.14859e-05
chr6	45888073	rs3729618	A	G	chr6	45890000	45900000	chr6	44600000	44610000	ENSG00000112782.11	5.14859e-05
chr6	45888073	rs3729618	A	G	chr6	45890000	45895000	chr6	44620000	44625000	ENSG00000112782.11	5.14859e-05
chr6	45888073	rs3729618	A	G	chr6	45890000	45900000	chr6	44620000	44630000	ENSG00000112782.11	5.14859e-05
chr6	45888073	rs3729618	A	G	chr6	45890000	45895000	chr6	45385000	45390000	ENSG00000112782.11	5.14859e-05
chr6	45888073	rs3729618	A	G	chr6	45890000	45900000	chr6	45680000	45690000	ENSG00000112782.11	5.14859e-05
chr6	45888073	rs3729618	A	G	chr6	45875000	45900000	chr6	45375000	45400000	ENSG00000112782.11	5.14859e-05
chr6	45889793	rs12204991	A	T	chr6	45890000	45895000	chr6	44435000	44440000	ENSG00000112782.11	3.51278e-05
chr6	45889793	rs12204991	A	T	chr6	45890000	45900000	chr6	44440000	44450000	ENSG00000112782.11	3.51278e-05
chr6	45889793	rs12204991	A	T	chr6	45890000	45895000	chr6	44560000	44565000	ENSG00000112782.11	3.51278e-05
chr6	45889793	rs12204991	A	T	chr6	45890000	45900000	chr6	44600000	44610000	ENSG00000112782.11	3.51278e-05
chr6	45889793	rs12204991	A	T	chr6	45890000	45895000	chr6	44620000	44625000	ENSG00000112782.11	3.51278e-05
chr6	45889793	rs12204991	A	T	chr6	45890000	45900000	chr6	44620000	44630000	ENSG00000112782.11	3.51278e-05
chr6	45889793	rs12204991	A	T	chr6	45890000	45895000	chr6	45385000	45390000	ENSG00000112782.11	3.51278e-05
chr6	45889793	rs12204991	A	T	chr6	45890000	45900000	chr6	45680000	45690000	ENSG00000112782.11	3.51278e-05
chr6	45889793	rs12204991	A	T	chr6	45875000	45900000	chr6	45375000	45400000	ENSG00000112782.11	3.51278e-05
chr6	45892487	rs9367229	T	C	chr6	45895000	45900000	chr6	46375000	46380000	ENSG00000112782.11	3.53831e-05
chr6	45892487	rs9367229	T	C	chr6	45890000	45895000	chr6	44435000	44440000	ENSG00000112782.11	3.53831e-05
chr6	45892487	rs9367229	T	C	chr6	45890000	45900000	chr6	44440000	44450000	ENSG00000112782.11	3.53831e-05
chr6	45892487	rs9367229	T	C	chr6	45890000	45895000	chr6	44560000	44565000	ENSG00000112782.11	3.53831e-05
chr6	45892487	rs9367229	T	C	chr6	45890000	45900000	chr6	44600000	44610000	ENSG00000112782.11	3.53831e-05
chr6	45892487	rs9367229	T	C	chr6	45890000	45895000	chr6	44620000	44625000	ENSG00000112782.11	3.53831e-05
chr6	45892487	rs9367229	T	C	chr6	45890000	45900000	chr6	44620000	44630000	ENSG00000112782.11	3.53831e-05
chr6	45892487	rs9367229	T	C	chr6	45890000	45895000	chr6	45385000	45390000	ENSG00000112782.11	3.53831e-05
chr6	45892487	rs9367229	T	C	chr6	45890000	45900000	chr6	45680000	45690000	ENSG00000112782.11	3.53831e-05
chr6	45892487	rs9367229	T	C	chr6	45875000	45900000	chr6	45375000	45400000	ENSG00000112782.11	3.53831e-05
chr7	26702506	rs757129	C	G	chr7	26700000	26725000	chr7	26100000	26125000	ENSG00000122592.6	2.6823e-05
chr7	26702506	rs757129	C	G	chr7	26700000	26710000	chr7	26130000	26140000	ENSG00000122592.6	2.6823e-05
chr7	26702506	rs757129	C	G	chr7	26700000	26725000	chr7	26225000	26250000	ENSG00000122592.6	2.6823e-05
chr7	26702506	rs757129	C	G	chr7	26705000	26710000	chr7	25930000	25935000	ENSG00000122592.6	2.6823e-05
chr7	26702506	rs757129	C	G	chr7	26705000	26710000	chr7	26405000	26410000	ENSG00000122592.6	2.6823e-05
chr7	26702506	rs757129	C	G	chr7	26705000	26710000	chr7	26410000	26415000	ENSG00000122592.6	2.6823e-05
chr7	115897222	rs2402058	A	G	chr7	115890000	115900000	chr7	116160000	116170000	ENSG00000237870.2	6.55552e-06
chr7	115897222	rs2402058	A	G	chr7	115890000	115900000	chr7	116440000	116450000	ENSG00000237870.2	6.55552e-06
chr7	115897222	rs2402058	A	G	chr7	115895000	115900000	chr7	116225000	116230000	ENSG00000237870.2	6.55552e-06
chr7	115897222	rs2402058	A	G	chr7	115895000	115900000	chr7	116445000	116450000	ENSG00000237870.2	6.55552e-06
chr7	115897222	rs2402058	A	G	chr7	115895000	115900000	chr7	116450000	116455000	ENSG00000237870.2	6.55552e-06
chr7	115897242	rs2402059	T	G	chr7	115890000	115900000	chr7	116160000	116170000	ENSG00000237870.2	6.55552e-06
chr7	115897242	rs2402059	T	G	chr7	115890000	115900000	chr7	116440000	116450000	ENSG00000237870.2	6.55552e-06
chr7	115897242	rs2402059	T	G	chr7	115895000	115900000	chr7	116225000	116230000	ENSG00000237870.2	6.55552e-06
chr7	115897242	rs2402059	T	G	chr7	115895000	115900000	chr7	116445000	116450000	ENSG00000237870.2	6.55552e-06
chr7	115897242	rs2402059	T	G	chr7	115895000	115900000	chr7	116450000	116455000	ENSG00000237870.2	6.55552e-06
chr7	115899335	rs4730721	T	A	chr7	115890000	115900000	chr7	116160000	116170000	ENSG00000237870.2	8.33831e-06
chr7	115899335	rs4730721	T	A	chr7	115890000	115900000	chr7	116440000	116450000	ENSG00000237870.2	8.33831e-06
chr7	115899335	rs4730721	T	A	chr7	115895000	115900000	chr7	116225000	116230000	ENSG00000237870.2	8.33831e-06
chr7	115899335	rs4730721	T	A	chr7	115895000	115900000	chr7	116445000	116450000	ENSG00000237870.2	8.33831e-06
chr7	115899335	rs4730721	T	A	chr7	115895000	115900000	chr7	116450000	116455000	ENSG00000237870.2	8.33831e-06
chr7	115900262	rs10242959	C	T	chr7	115890000	115900000	chr7	116160000	116170000	ENSG00000237870.2	4.85148e-06
chr7	115900262	rs10242959	C	T	chr7	115890000	115900000	chr7	116440000	116450000	ENSG00000237870.2	4.85148e-06
chr7	115900262	rs10242959	C	T	chr7	115895000	115900000	chr7	116225000	116230000	ENSG00000237870.2	4.85148e-06
chr7	115900262	rs10242959	C	T	chr7	115895000	115900000	chr7	116445000	116450000	ENSG00000237870.2	4.85148e-06
chr7	115900262	rs10242959	C	T	chr7	115895000	115900000	chr7	116450000	116455000	ENSG00000237870.2	4.85148e-06
chr7	115900353	rs10261531	T	A	chr7	115890000	115900000	chr7	116160000	116170000	ENSG00000237870.2	5.07857e-06
chr7	115900353	rs10261531	T	A	chr7	115890000	115900000	chr7	116440000	116450000	ENSG00000237870.2	5.07857e-06
chr7	115900353	rs10261531	T	A	chr7	115895000	115900000	chr7	116225000	116230000	ENSG00000237870.2	5.07857e-06
chr7	115900353	rs10261531	T	A	chr7	115895000	115900000	chr7	116445000	116450000	ENSG00000237870.2	5.07857e-06
chr7	115900353	rs10261531	T	A	chr7	115895000	115900000	chr7	116450000	116455000	ENSG00000237870.2	5.07857e-06
chr7	115900724	rs10500061	C	G	chr7	115890000	115900000	chr7	116160000	116170000	ENSG00000237870.2	4.93285e-06
chr7	115900724	rs10500061	C	G	chr7	115890000	115900000	chr7	116440000	116450000	ENSG00000237870.2	4.93285e-06
chr7	115900724	rs10500061	C	G	chr7	115895000	115900000	chr7	116225000	116230000	ENSG00000237870.2	4.93285e-06
chr7	115900724	rs10500061	C	G	chr7	115895000	115900000	chr7	116445000	116450000	ENSG00000237870.2	4.93285e-06
chr7	115900724	rs10500061	C	G	chr7	115895000	115900000	chr7	116450000	116455000	ENSG00000237870.2	4.93285e-06
chr7	115900820	rs60927526	T	G	chr7	115890000	115900000	chr7	116160000	116170000	ENSG00000237870.2	8.08256e-06
chr7	115900820	rs60927526	T	G	chr7	115890000	115900000	chr7	116440000	116450000	ENSG00000237870.2	8.08256e-06
chr7	115900820	rs60927526	T	G	chr7	115895000	115900000	chr7	116225000	116230000	ENSG00000237870.2	8.08256e-06
chr7	115900820	rs60927526	T	G	chr7	115895000	115900000	chr7	116445000	116450000	ENSG00000237870.2	8.08256e-06
chr7	115900820	rs60927526	T	G	chr7	115895000	115900000	chr7	116450000	116455000	ENSG00000237870.2	8.08256e-06
chr11	64129722	rs538147	G	A	chr11	64130000	64140000	chr11	64410000	64420000	ENSG00000236935.1	2.06215e-05
chr11	64412891	rs11820322	C	T	chr11	64410000	64420000	chr11	64130000	64140000	ENSG00000110076.14	1.76616e-05
chr11	64412891	rs11820322	C	T	chr11	64410000	64420000	chr11	64320000	64330000	ENSG00000110076.14	1.76616e-05
chr14	96030442	rs7152619	T	C	chr14	96030000	96040000	chr14	96460000	96470000	ENSG00000182512.4	9.34469e-06
chr14	96030442	rs7152619	T	C	chr14	96020000	96030000	chr14	96460000	96470000	ENSG00000182512.4	9.34469e-06
chr14	96030442	rs7152619	T	C	chr14	96025000	96030000	chr14	96460000	96465000	ENSG00000182512.4	9.34469e-06
chr14	96030763	rs8014367	C	T	chr14	96030000	96040000	chr14	96460000	96470000	ENSG00000182512.4	1.68764e-05
chr14	96030763	rs8014367	C	T	chr14	96020000	96030000	chr14	96460000	96470000	ENSG00000182512.4	1.68764e-05
chr14	96030763	rs8014367	C	T	chr14	96025000	96030000	chr14	96460000	96465000	ENSG00000182512.4	1.68764e-05
chr14	96031957	rs9323929	C	T	chr14	96030000	96040000	chr14	96460000	96470000	ENSG00000182512.4	2.0606e-05
chr14	96031957	rs9323929	C	T	chr14	96020000	96030000	chr14	96460000	96470000	ENSG00000182512.4	2.0606e-05
chr14	96031957	rs9323929	C	T	chr14	96025000	96030000	chr14	96460000	96465000	ENSG00000182512.4	2.0606e-05
chr20	13786587	rs6079180	A	G	chr20	13790000	13800000	chr20	14030000	14040000	ENSG00000101247.13	8.06001e-28
Adipose_Visceral_Omentum
chr2	232058493	rs2368563	A	G	chr2	232055000	232060000	chr2	231970000	231975000	ENSG00000204128.5	2.23288e-08
chr2	232058493	rs2368563	A	G	chr2	232060000	232065000	chr2	231970000	231975000	ENSG00000204128.5	2.23288e-08
chr2	232058493	rs2368563	A	G	chr2	232060000	232070000	chr2	231970000	231980000	ENSG00000204128.5	2.23288e-08
chr2	232060843	rs60664562	T	A	chr2	232055000	232060000	chr2	231970000	231975000	ENSG00000204128.5	6.29418e-09
chr2	232060843	rs60664562	T	A	chr2	232060000	232065000	chr2	231970000	231975000	ENSG00000204128.5	6.29418e-09
chr2	232060843	rs60664562	T	A	chr2	232060000	232070000	chr2	231970000	231980000	ENSG00000204128.5	6.29418e-09
chr2	232061520	rs62197322	A	G	chr2	232055000	232060000	chr2	231970000	231975000	ENSG00000204128.5	1.5487e-08
chr2	232061520	rs62197322	A	G	chr2	232060000	232065000	chr2	231970000	231975000	ENSG00000204128.5	1.5487e-08
chr2	232061520	rs62197322	A	G	chr2	232060000	232070000	chr2	231970000	231980000	ENSG00000204128.5	1.5487e-08
chr6	32606274	rs113219465	C	T	chr6	32610000	32620000	chr6	45660000	45670000	ENSG00000198502.5	7.66474e-06
chr6	32606274	rs113219465	C	T	chr6	32600000	32625000	chr6	45650000	45675000	ENSG00000198502.5	7.66474e-06
chr6	32608762	rs80154958	T	C	chr6	32610000	32620000	chr6	45660000	45670000	ENSG00000198502.5	5.85733e-06
chr6	32608762	rs80154958	T	C	chr6	32600000	32625000	chr6	45650000	45675000	ENSG00000198502.5	5.85733e-06
chr6	32610310	rs113551974	C	T	chr6	32610000	32620000	chr6	45660000	45670000	ENSG00000198502.5	5.85733e-06
chr6	32610310	rs113551974	C	T	chr6	32600000	32625000	chr6	45650000	45675000	ENSG00000198502.5	5.85733e-06
chr6	32611624	rs73409538	G	T	chr6	32610000	32620000	chr6	45660000	45670000	ENSG00000198502.5	5.85733e-06
chr6	32611624	rs73409538	G	T	chr6	32600000	32625000	chr6	45650000	45675000	ENSG00000198502.5	5.85733e-06
chr6	32629931	rs41542812	C	G	chr6	32600000	32625000	chr6	45650000	45675000	ENSG00000198502.5	1.38236e-05
chr7	115860783	rs1004107	A	T	chr7	115865000	115870000	chr7	115830000	115835000	ENSG00000135269.13	4.85512e-05
chr7	115861660	rs9969224	T	C	chr7	115865000	115870000	chr7	115830000	115835000	ENSG00000135269.13	4.85512e-05
chr7	115862902	rs1000966	A	G	chr7	115865000	115870000	chr7	115830000	115835000	ENSG00000135269.13	4.85512e-05
chr7	115863446	rs3807968	G	A	chr7	115865000	115870000	chr7	115830000	115835000	ENSG00000135269.13	4.85512e-05
chr7	115880277	rs3807975	G	A	chr7	115870000	115880000	chr7	115810000	115820000	ENSG00000135269.13	4.66283e-05
chr7	115880277	rs3807975	G	A	chr7	115875000	115880000	chr7	115815000	115820000	ENSG00000135269.13	4.66283e-05
chr7	115881159	rs66652906	G	A	chr7	115870000	115880000	chr7	115810000	115820000	ENSG00000135269.13	3.99571e-05
chr7	115881159	rs66652906	G	A	chr7	115875000	115880000	chr7	115815000	115820000	ENSG00000135269.13	3.99571e-05
chr7	115881458	rs58595078	A	G	chr7	115870000	115880000	chr7	115810000	115820000	ENSG00000135269.13	4.85512e-05
chr7	115881458	rs58595078	A	G	chr7	115875000	115880000	chr7	115815000	115820000	ENSG00000135269.13	4.85512e-05
chr7	115892650	rs1048508	T	G	chr7	115890000	115900000	chr7	116160000	116170000	ENSG00000135269.13	4.28575e-05
chr7	115892650	rs1048508	T	G	chr7	115890000	115900000	chr7	116440000	116450000	ENSG00000135269.13	4.28575e-05
chr7	115892650	rs1048508	T	G	chr7	115895000	115900000	chr7	116225000	116230000	ENSG00000135269.13	4.28575e-05
chr7	115892650	rs1048508	T	G	chr7	115895000	115900000	chr7	116445000	116450000	ENSG00000135269.13	4.28575e-05
chr7	115892650	rs1048508	T	G	chr7	115895000	115900000	chr7	116450000	116455000	ENSG00000135269.13	4.28575e-05
chr7	115892738	rs17138472	A	G	chr7	115890000	115900000	chr7	116160000	116170000	ENSG00000135269.13	4.19706e-05
chr7	115892738	rs17138472	A	G	chr7	115890000	115900000	chr7	116440000	116450000	ENSG00000135269.13	4.19706e-05
chr7	115892738	rs17138472	A	G	chr7	115895000	115900000	chr7	116225000	116230000	ENSG00000135269.13	4.19706e-05
chr7	115892738	rs17138472	A	G	chr7	115895000	115900000	chr7	116445000	116450000	ENSG00000135269.13	4.19706e-05
chr7	115892738	rs17138472	A	G	chr7	115895000	115900000	chr7	116450000	116455000	ENSG00000135269.13	4.19706e-05
chr7	115893647	rs3807980	A	G	chr7	115890000	115900000	chr7	116160000	116170000	ENSG00000135269.13	4.28575e-05
chr7	115893647	rs3807980	A	G	chr7	115890000	115900000	chr7	116440000	116450000	ENSG00000135269.13	4.28575e-05
chr7	115893647	rs3807980	A	G	chr7	115895000	115900000	chr7	116225000	116230000	ENSG00000135269.13	4.28575e-05
chr7	115893647	rs3807980	A	G	chr7	115895000	115900000	chr7	116445000	116450000	ENSG00000135269.13	4.28575e-05
chr7	115893647	rs3807980	A	G	chr7	115895000	115900000	chr7	116450000	116455000	ENSG00000135269.13	4.28575e-05
chr7	115894403	rs17138486	C	G	chr7	115890000	115900000	chr7	116160000	116170000	ENSG00000135269.13	4.42024e-05
chr7	115894403	rs17138486	C	G	chr7	115890000	115900000	chr7	116440000	116450000	ENSG00000135269.13	4.42024e-05
chr7	115894403	rs17138486	C	G	chr7	115895000	115900000	chr7	116225000	116230000	ENSG00000135269.13	4.42024e-05
chr7	115894403	rs17138486	C	G	chr7	115895000	115900000	chr7	116445000	116450000	ENSG00000135269.13	4.42024e-05
chr7	115894403	rs17138486	C	G	chr7	115895000	115900000	chr7	116450000	116455000	ENSG00000135269.13	4.42024e-05
chr7	115897871	rs2896180	A	G	chr7	115890000	115900000	chr7	116160000	116170000	ENSG00000135269.13	4.70289e-05
chr7	115897871	rs2896180	A	G	chr7	115890000	115900000	chr7	116440000	116450000	ENSG00000135269.13	4.70289e-05
chr7	115897871	rs2896180	A	G	chr7	115895000	115900000	chr7	116225000	116230000	ENSG00000135269.13	4.70289e-05
chr7	115897871	rs2896180	A	G	chr7	115895000	115900000	chr7	116445000	116450000	ENSG00000135269.13	4.70289e-05
chr7	115897871	rs2896180	A	G	chr7	115895000	115900000	chr7	116450000	116455000	ENSG00000135269.13	4.70289e-05
chr7	115897884	rs2896181	C	T	chr7	115890000	115900000	chr7	116160000	116170000	ENSG00000135269.13	4.70289e-05
chr7	115897884	rs2896181	C	T	chr7	115890000	115900000	chr7	116440000	116450000	ENSG00000135269.13	4.70289e-05
chr7	115897884	rs2896181	C	T	chr7	115895000	115900000	chr7	116225000	116230000	ENSG00000135269.13	4.70289e-05
chr7	115897884	rs2896181	C	T	chr7	115895000	115900000	chr7	116445000	116450000	ENSG00000135269.13	4.70289e-05
chr7	115897884	rs2896181	C	T	chr7	115895000	115900000	chr7	116450000	116455000	ENSG00000135269.13	4.70289e-05
chr7	115900686	rs10500060	C	T	chr7	115890000	115900000	chr7	116160000	116170000	ENSG00000135269.13	4.27114e-05
chr7	115900686	rs10500060	C	T	chr7	115890000	115900000	chr7	116440000	116450000	ENSG00000135269.13	4.27114e-05
chr7	115900686	rs10500060	C	T	chr7	115895000	115900000	chr7	116225000	116230000	ENSG00000135269.13	4.27114e-05
chr7	115900686	rs10500060	C	T	chr7	115895000	115900000	chr7	116445000	116450000	ENSG00000135269.13	4.27114e-05
chr7	115900686	rs10500060	C	T	chr7	115895000	115900000	chr7	116450000	116455000	ENSG00000135269.13	4.27114e-05
chr11	64129722	rs538147	G	A	chr11	64130000	64140000	chr11	64410000	64420000	ENSG00000236935.1	7.0337e-07
chr13	44397815	rs9533634	T	C	chr13	44375000	44400000	chr13	43150000	43175000	ENSG00000151773.8	3.16032e-09
chr13	44397815	rs9533634	T	C	chr13	44375000	44400000	chr13	43525000	43550000	ENSG00000151773.8	3.16032e-09
chr13	44397815	rs9533634	T	C	chr13	44375000	44400000	chr13	43650000	43675000	ENSG00000151773.8	3.16032e-09
chr13	44457925	rs3764147	A	G	chr13	44450000	44460000	chr13	43560000	43570000	ENSG00000151773.8	1.8577e-08
chr14	90858484	rs7150626	C	T	chr14	90850000	90860000	chr14	90420000	90430000	ENSG00000198668.6	2.64288e-06
chr14	90858484	rs7150626	C	T	chr14	90860000	90870000	chr14	91220000	91230000	ENSG00000198668.6	2.64288e-06
chr16	57452165	rs188872	A	G	chr16	57445000	57450000	chr16	57335000	57340000	ENSG00000005194.10	1.92362e-07
chr16	57452165	rs188872	A	G	chr16	57450000	57460000	chr16	57550000	57560000	ENSG00000005194.10	1.92362e-07
chr16	57452165	rs188872	A	G	chr16	57455000	57460000	chr16	57335000	57340000	ENSG00000005194.10	1.92362e-07
chr20	13786587	rs6079180	A	G	chr20	13790000	13800000	chr20	14030000	14040000	ENSG00000101247.13	1.17488e-12
AdreTl_Gland
chr7	115860783	rs1004107	A	T	chr7	115865000	115870000	chr7	115830000	115835000	ENSG00000135269.13	1.00525e-10
chr7	115861660	rs9969224	T	C	chr7	115865000	115870000	chr7	115830000	115835000	ENSG00000135269.13	1.00525e-10
chr7	115862296	rs1004109	A	T	chr7	115865000	115870000	chr7	115830000	115835000	ENSG00000135269.13	9.40764e-11
chr7	115862902	rs1000966	A	G	chr7	115865000	115870000	chr7	115830000	115835000	ENSG00000135269.13	1.40716e-10
chr7	115863446	rs3807968	G	A	chr7	115865000	115870000	chr7	115830000	115835000	ENSG00000135269.13	1.00525e-10
chr7	115864889	rs3779509	C	A	chr7	115865000	115870000	chr7	115830000	115835000	ENSG00000135269.13	9.0732e-11
chr7	115866354	rs1881287	A	G	chr7	115870000	115880000	chr7	115810000	115820000	ENSG00000135269.13	9.0732e-11
chr7	115866354	rs1881287	A	G	chr7	115865000	115870000	chr7	115830000	115835000	ENSG00000135269.13	9.0732e-11
chr7	115868798	rs58624059	T	C	chr7	115870000	115880000	chr7	115810000	115820000	ENSG00000135269.13	5.19595e-11
chr7	115868798	rs58624059	T	C	chr7	115865000	115870000	chr7	115830000	115835000	ENSG00000135269.13	5.19595e-11
chr7	115874466	rs12670683	T	C	chr7	115870000	115880000	chr7	115810000	115820000	ENSG00000135269.13	9.26489e-11
chr7	115874466	rs12670683	T	C	chr7	115875000	115880000	chr7	115815000	115820000	ENSG00000135269.13	9.26489e-11
chr7	115874466	rs12670683	T	C	chr7	115865000	115870000	chr7	115830000	115835000	ENSG00000135269.13	9.26489e-11
chr7	115874560	rs2030978	C	T	chr7	115870000	115880000	chr7	115810000	115820000	ENSG00000135269.13	9.0732e-11
chr7	115874560	rs2030978	C	T	chr7	115875000	115880000	chr7	115815000	115820000	ENSG00000135269.13	9.0732e-11
chr7	115874560	rs2030978	C	T	chr7	115865000	115870000	chr7	115830000	115835000	ENSG00000135269.13	9.0732e-11
chr7	115875359	rs2030977	G	C	chr7	115870000	115880000	chr7	115810000	115820000	ENSG00000135269.13	9.0732e-11
chr7	115875359	rs2030977	G	C	chr7	115875000	115880000	chr7	115815000	115820000	ENSG00000135269.13	9.0732e-11
chr7	115876365	rs6959237	C	T	chr7	115870000	115880000	chr7	115810000	115820000	ENSG00000135269.13	9.0732e-11
chr7	115876365	rs6959237	C	T	chr7	115875000	115880000	chr7	115815000	115820000	ENSG00000135269.13	9.0732e-11
chr7	115880277	rs3807975	G	A	chr7	115870000	115880000	chr7	115810000	115820000	ENSG00000135269.13	9.0732e-11
chr7	115880277	rs3807975	G	A	chr7	115875000	115880000	chr7	115815000	115820000	ENSG00000135269.13	9.0732e-11
chr7	115881159	rs66652906	G	A	chr7	115870000	115880000	chr7	115810000	115820000	ENSG00000135269.13	9.52337e-11
chr7	115881159	rs66652906	G	A	chr7	115875000	115880000	chr7	115815000	115820000	ENSG00000135269.13	9.52337e-11
chr7	115881458	rs58595078	A	G	chr7	115870000	115880000	chr7	115810000	115820000	ENSG00000135269.13	1.00525e-10
chr7	115881458	rs58595078	A	G	chr7	115875000	115880000	chr7	115815000	115820000	ENSG00000135269.13	1.00525e-10
chr7	115882323	rs3757730	G	A	chr7	115870000	115880000	chr7	115810000	115820000	ENSG00000135269.13	9.0732e-11
chr7	115882323	rs3757730	G	A	chr7	115875000	115880000	chr7	115815000	115820000	ENSG00000135269.13	9.0732e-11
chr7	115883453	rs57321537	T	G	chr7	115870000	115880000	chr7	115810000	115820000	ENSG00000135269.13	1.12157e-10
chr7	115883453	rs57321537	T	G	chr7	115875000	115880000	chr7	115815000	115820000	ENSG00000135269.13	1.12157e-10
chr7	115884319	rs138623810	C	A	chr7	115870000	115880000	chr7	115810000	115820000	ENSG00000135269.13	9.0732e-11
chr7	115884319	rs138623810	C	A	chr7	115875000	115880000	chr7	115815000	115820000	ENSG00000135269.13	9.0732e-11
chr7	115886079	rs7811984	A	G	chr7	115890000	115900000	chr7	116160000	116170000	ENSG00000135269.13	9.0732e-11
chr7	115886079	rs7811984	A	G	chr7	115890000	115900000	chr7	116440000	116450000	ENSG00000135269.13	9.0732e-11
chr7	115888162	rs6953050	A	G	chr7	115890000	115900000	chr7	116160000	116170000	ENSG00000135269.13	9.0732e-11
chr7	115888162	rs6953050	A	G	chr7	115890000	115900000	chr7	116440000	116450000	ENSG00000135269.13	9.0732e-11
chr7	115888339	rs6957561	G	A	chr7	115890000	115900000	chr7	116160000	116170000	ENSG00000135269.13	9.0732e-11
chr7	115888339	rs6957561	G	A	chr7	115890000	115900000	chr7	116440000	116450000	ENSG00000135269.13	9.0732e-11
chr7	115892650	rs1048508	T	G	chr7	115890000	115900000	chr7	116160000	116170000	ENSG00000135269.13	3.75809e-11
chr7	115892650	rs1048508	T	G	chr7	115890000	115900000	chr7	116440000	116450000	ENSG00000135269.13	3.75809e-11
chr7	115892650	rs1048508	T	G	chr7	115895000	115900000	chr7	116225000	116230000	ENSG00000135269.13	3.75809e-11
chr7	115892650	rs1048508	T	G	chr7	115895000	115900000	chr7	116445000	116450000	ENSG00000135269.13	3.75809e-11
chr7	115892650	rs1048508	T	G	chr7	115895000	115900000	chr7	116450000	116455000	ENSG00000135269.13	3.75809e-11
chr7	115892738	rs17138472	A	G	chr7	115890000	115900000	chr7	116160000	116170000	ENSG00000135269.13	3.75809e-11
chr7	115892738	rs17138472	A	G	chr7	115890000	115900000	chr7	116440000	116450000	ENSG00000135269.13	3.75809e-11
chr7	115892738	rs17138472	A	G	chr7	115895000	115900000	chr7	116225000	116230000	ENSG00000135269.13	3.75809e-11
chr7	115892738	rs17138472	A	G	chr7	115895000	115900000	chr7	116445000	116450000	ENSG00000135269.13	3.75809e-11
chr7	115892738	rs17138472	A	G	chr7	115895000	115900000	chr7	116450000	116455000	ENSG00000135269.13	3.75809e-11
chr7	115893407	rs3823977	A	T	chr7	115890000	115900000	chr7	116160000	116170000	ENSG00000135269.13	1.91881e-11
chr7	115893407	rs3823977	A	T	chr7	115890000	115900000	chr7	116440000	116450000	ENSG00000135269.13	1.91881e-11
chr7	115893407	rs3823977	A	T	chr7	115895000	115900000	chr7	116225000	116230000	ENSG00000135269.13	1.91881e-11
chr7	115893407	rs3823977	A	T	chr7	115895000	115900000	chr7	116445000	116450000	ENSG00000135269.13	1.91881e-11
chr7	115893407	rs3823977	A	T	chr7	115895000	115900000	chr7	116450000	116455000	ENSG00000135269.13	1.91881e-11
chr7	115893647	rs3807980	A	G	chr7	115890000	115900000	chr7	116160000	116170000	ENSG00000135269.13	3.75809e-11
chr7	115893647	rs3807980	A	G	chr7	115890000	115900000	chr7	116440000	116450000	ENSG00000135269.13	3.75809e-11
chr7	115893647	rs3807980	A	G	chr7	115895000	115900000	chr7	116225000	116230000	ENSG00000135269.13	3.75809e-11
chr7	115893647	rs3807980	A	G	chr7	115895000	115900000	chr7	116445000	116450000	ENSG00000135269.13	3.75809e-11
chr7	115893647	rs3807980	A	G	chr7	115895000	115900000	chr7	116450000	116455000	ENSG00000135269.13	3.75809e-11
chr7	115893845	rs17138483	A	C	chr7	115890000	115900000	chr7	116160000	116170000	ENSG00000135269.13	7.392e-12
chr7	115893845	rs17138483	A	C	chr7	115890000	115900000	chr7	116440000	116450000	ENSG00000135269.13	7.392e-12
chr7	115893845	rs17138483	A	C	chr7	115895000	115900000	chr7	116225000	116230000	ENSG00000135269.13	7.392e-12
chr7	115893845	rs17138483	A	C	chr7	115895000	115900000	chr7	116445000	116450000	ENSG00000135269.13	7.392e-12
chr7	115893845	rs17138483	A	C	chr7	115895000	115900000	chr7	116450000	116455000	ENSG00000135269.13	7.392e-12
chr7	115894403	rs17138486	C	G	chr7	115890000	115900000	chr7	116160000	116170000	ENSG00000135269.13	7.392e-12
chr7	115894403	rs17138486	C	G	chr7	115890000	115900000	chr7	116440000	116450000	ENSG00000135269.13	7.392e-12
chr7	115894403	rs17138486	C	G	chr7	115895000	115900000	chr7	116225000	116230000	ENSG00000135269.13	7.392e-12
chr7	115894403	rs17138486	C	G	chr7	115895000	115900000	chr7	116445000	116450000	ENSG00000135269.13	7.392e-12
chr7	115894403	rs17138486	C	G	chr7	115895000	115900000	chr7	116450000	116455000	ENSG00000135269.13	7.392e-12
chr7	115894589	rs112016811	A	T	chr7	115890000	115900000	chr7	116160000	116170000	ENSG00000135269.13	1.39824e-11
chr7	115894589	rs112016811	A	T	chr7	115890000	115900000	chr7	116440000	116450000	ENSG00000135269.13	1.39824e-11
chr7	115894589	rs112016811	A	T	chr7	115895000	115900000	chr7	116225000	116230000	ENSG00000135269.13	1.39824e-11
chr7	115894589	rs112016811	A	T	chr7	115895000	115900000	chr7	116445000	116450000	ENSG00000135269.13	1.39824e-11
chr7	115894589	rs112016811	A	T	chr7	115895000	115900000	chr7	116450000	116455000	ENSG00000135269.13	1.39824e-11
chr7	115895010	rs4730719	G	T	chr7	115890000	115900000	chr7	116160000	116170000	ENSG00000135269.13	1.1616e-11
chr7	115895010	rs4730719	G	T	chr7	115890000	115900000	chr7	116440000	116450000	ENSG00000135269.13	1.1616e-11
chr7	115895010	rs4730719	G	T	chr7	115895000	115900000	chr7	116225000	116230000	ENSG00000135269.13	1.1616e-11
chr7	115895010	rs4730719	G	T	chr7	115895000	115900000	chr7	116445000	116450000	ENSG00000135269.13	1.1616e-11
chr7	115895010	rs4730719	G	T	chr7	115895000	115900000	chr7	116450000	116455000	ENSG00000135269.13	1.1616e-11
chr7	115895235	rs4730720	T	C	chr7	115890000	115900000	chr7	116160000	116170000	ENSG00000135269.13	7.392e-12
chr7	115895235	rs4730720	T	C	chr7	115890000	115900000	chr7	116440000	116450000	ENSG00000135269.13	7.392e-12
chr7	115895235	rs4730720	T	C	chr7	115895000	115900000	chr7	116225000	116230000	ENSG00000135269.13	7.392e-12
chr7	115895235	rs4730720	T	C	chr7	115895000	115900000	chr7	116445000	116450000	ENSG00000135269.13	7.392e-12
chr7	115895235	rs4730720	T	C	chr7	115895000	115900000	chr7	116450000	116455000	ENSG00000135269.13	7.392e-12
chr7	115895433	rs6948556	T	C	chr7	115890000	115900000	chr7	116160000	116170000	ENSG00000135269.13	7.392e-12
chr7	115895433	rs6948556	T	C	chr7	115890000	115900000	chr7	116440000	116450000	ENSG00000135269.13	7.392e-12
chr7	115895433	rs6948556	T	C	chr7	115895000	115900000	chr7	116225000	116230000	ENSG00000135269.13	7.392e-12
chr7	115895433	rs6948556	T	C	chr7	115895000	115900000	chr7	116445000	116450000	ENSG00000135269.13	7.392e-12
chr7	115895433	rs6948556	T	C	chr7	115895000	115900000	chr7	116450000	116455000	ENSG00000135269.13	7.392e-12
chr7	115895718	rs6966770	A	G	chr7	115890000	115900000	chr7	116160000	116170000	ENSG00000135269.13	7.392e-12
chr7	115895718	rs6966770	A	G	chr7	115890000	115900000	chr7	116440000	116450000	ENSG00000135269.13	7.392e-12
chr7	115895718	rs6966770	A	G	chr7	115895000	115900000	chr7	116225000	116230000	ENSG00000135269.13	7.392e-12
chr7	115895718	rs6966770	A	G	chr7	115895000	115900000	chr7	116445000	116450000	ENSG00000135269.13	7.392e-12
chr7	115895718	rs6966770	A	G	chr7	115895000	115900000	chr7	116450000	116455000	ENSG00000135269.13	7.392e-12
chr7	115896049	rs6967695	G	A	chr7	115890000	115900000	chr7	116160000	116170000	ENSG00000135269.13	7.392e-12
chr7	115896049	rs6967695	G	A	chr7	115890000	115900000	chr7	116440000	116450000	ENSG00000135269.13	7.392e-12
chr7	115896049	rs6967695	G	A	chr7	115895000	115900000	chr7	116225000	116230000	ENSG00000135269.13	7.392e-12
chr7	115896049	rs6967695	G	A	chr7	115895000	115900000	chr7	116445000	116450000	ENSG00000135269.13	7.392e-12
chr7	115896049	rs6967695	G	A	chr7	115895000	115900000	chr7	116450000	116455000	ENSG00000135269.13	7.392e-12
chr7	115896716	rs3807981	G	A	chr7	115890000	115900000	chr7	116160000	116170000	ENSG00000135269.13	9.82858e-12
chr7	115896716	rs3807981	G	A	chr7	115890000	115900000	chr7	116440000	116450000	ENSG00000135269.13	9.82858e-12
chr7	115896716	rs3807981	G	A	chr7	115895000	115900000	chr7	116225000	116230000	ENSG00000135269.13	9.82858e-12
chr7	115896716	rs3807981	G	A	chr7	115895000	115900000	chr7	116445000	116450000	ENSG00000135269.13	9.82858e-12
chr7	115896716	rs3807981	G	A	chr7	115895000	115900000	chr7	116450000	116455000	ENSG00000135269.13	9.82858e-12
chr7	115897096	rs2402057	T	C	chr7	115890000	115900000	chr7	116160000	116170000	ENSG00000135269.13	4.88022e-12
chr7	115897096	rs2402057	T	C	chr7	115890000	115900000	chr7	116440000	116450000	ENSG00000135269.13	4.88022e-12
chr7	115897096	rs2402057	T	C	chr7	115895000	115900000	chr7	116225000	116230000	ENSG00000135269.13	4.88022e-12
chr7	115897096	rs2402057	T	C	chr7	115895000	115900000	chr7	116445000	116450000	ENSG00000135269.13	4.88022e-12
chr7	115897096	rs2402057	T	C	chr7	115895000	115900000	chr7	116450000	116455000	ENSG00000135269.13	4.88022e-12
chr7	115897871	rs2896180	A	G	chr7	115890000	115900000	chr7	116160000	116170000	ENSG00000135269.13	6.32055e-12
chr7	115897871	rs2896180	A	G	chr7	115890000	115900000	chr7	116440000	116450000	ENSG00000135269.13	6.32055e-12
chr7	115897871	rs2896180	A	G	chr7	115895000	115900000	chr7	116225000	116230000	ENSG00000135269.13	6.32055e-12
chr7	115897871	rs2896180	A	G	chr7	115895000	115900000	chr7	116445000	116450000	ENSG00000135269.13	6.32055e-12
chr7	115897871	rs2896180	A	G	chr7	115895000	115900000	chr7	116450000	116455000	ENSG00000135269.13	6.32055e-12
chr7	115897884	rs2896181	C	T	chr7	115890000	115900000	chr7	116160000	116170000	ENSG00000135269.13	6.32055e-12
chr7	115897884	rs2896181	C	T	chr7	115890000	115900000	chr7	116440000	116450000	ENSG00000135269.13	6.32055e-12
chr7	115897884	rs2896181	C	T	chr7	115895000	115900000	chr7	116225000	116230000	ENSG00000135269.13	6.32055e-12
chr7	115897884	rs2896181	C	T	chr7	115895000	115900000	chr7	116445000	116450000	ENSG00000135269.13	6.32055e-12
chr7	115897884	rs2896181	C	T	chr7	115895000	115900000	chr7	116450000	116455000	ENSG00000135269.13	6.32055e-12
chr7	115898177	rs3173919	G	C	chr7	115890000	115900000	chr7	116160000	116170000	ENSG00000135269.13	4.70774e-12
chr7	115898177	rs3173919	G	C	chr7	115890000	115900000	chr7	116440000	116450000	ENSG00000135269.13	4.70774e-12
chr7	115898177	rs3173919	G	C	chr7	115895000	115900000	chr7	116225000	116230000	ENSG00000135269.13	4.70774e-12
chr7	115898177	rs3173919	G	C	chr7	115895000	115900000	chr7	116445000	116450000	ENSG00000135269.13	4.70774e-12
chr7	115898177	rs3173919	G	C	chr7	115895000	115900000	chr7	116450000	116455000	ENSG00000135269.13	4.70774e-12
chr7	115898442	rs1141470	G	C	chr7	115890000	115900000	chr7	116160000	116170000	ENSG00000135269.13	7.6994e-12
chr7	115898442	rs1141470	G	C	chr7	115890000	115900000	chr7	116440000	116450000	ENSG00000135269.13	7.6994e-12
chr7	115898442	rs1141470	G	C	chr7	115895000	115900000	chr7	116225000	116230000	ENSG00000135269.13	7.6994e-12
chr7	115898442	rs1141470	G	C	chr7	115895000	115900000	chr7	116445000	116450000	ENSG00000135269.13	7.6994e-12
chr7	115898442	rs1141470	G	C	chr7	115895000	115900000	chr7	116450000	116455000	ENSG00000135269.13	7.6994e-12
chr7	115898885	rs3807982	T	C	chr7	115890000	115900000	chr7	116160000	116170000	ENSG00000135269.13	7.392e-12
chr7	115898885	rs3807982	T	C	chr7	115890000	115900000	chr7	116440000	116450000	ENSG00000135269.13	7.392e-12
chr7	115898885	rs3807982	T	C	chr7	115895000	115900000	chr7	116225000	116230000	ENSG00000135269.13	7.392e-12
chr7	115898885	rs3807982	T	C	chr7	115895000	115900000	chr7	116445000	116450000	ENSG00000135269.13	7.392e-12
chr7	115898885	rs3807982	T	C	chr7	115895000	115900000	chr7	116450000	116455000	ENSG00000135269.13	7.392e-12
chr7	115898991	rs3807983	T	C	chr7	115890000	115900000	chr7	116160000	116170000	ENSG00000135269.13	7.6994e-12
chr7	115898991	rs3807983	T	C	chr7	115890000	115900000	chr7	116440000	116450000	ENSG00000135269.13	7.6994e-12
chr7	115898991	rs3807983	T	C	chr7	115895000	115900000	chr7	116225000	116230000	ENSG00000135269.13	7.6994e-12
chr7	115898991	rs3807983	T	C	chr7	115895000	115900000	chr7	116445000	116450000	ENSG00000135269.13	7.6994e-12
chr7	115898991	rs3807983	T	C	chr7	115895000	115900000	chr7	116450000	116455000	ENSG00000135269.13	7.6994e-12
chr7	115900394	rs10500059	C	T	chr7	115890000	115900000	chr7	116160000	116170000	ENSG00000135269.13	1.53975e-11
chr7	115900394	rs10500059	C	T	chr7	115890000	115900000	chr7	116440000	116450000	ENSG00000135269.13	1.53975e-11
chr7	115900394	rs10500059	C	T	chr7	115895000	115900000	chr7	116225000	116230000	ENSG00000135269.13	1.53975e-11
chr7	115900394	rs10500059	C	T	chr7	115895000	115900000	chr7	116445000	116450000	ENSG00000135269.13	1.53975e-11
chr7	115900394	rs10500059	C	T	chr7	115895000	115900000	chr7	116450000	116455000	ENSG00000135269.13	1.53975e-11
chr7	115900686	rs10500060	C	T	chr7	115890000	115900000	chr7	116160000	116170000	ENSG00000135269.13	2.41897e-11
chr7	115900686	rs10500060	C	T	chr7	115890000	115900000	chr7	116440000	116450000	ENSG00000135269.13	2.41897e-11
chr7	115900686	rs10500060	C	T	chr7	115895000	115900000	chr7	116225000	116230000	ENSG00000135269.13	2.41897e-11
chr7	115900686	rs10500060	C	T	chr7	115895000	115900000	chr7	116445000	116450000	ENSG00000135269.13	2.41897e-11
chr7	115900686	rs10500060	C	T	chr7	115895000	115900000	chr7	116450000	116455000	ENSG00000135269.13	2.41897e-11
chr7	115904052	rs4730723	T	C	chr7	115890000	115900000	chr7	116160000	116170000	ENSG00000135269.13	2.45646e-09
chr7	115904052	rs4730723	T	C	chr7	115890000	115900000	chr7	116440000	116450000	ENSG00000135269.13	2.45646e-09
chr7	115904052	rs4730723	T	C	chr7	115895000	115900000	chr7	116225000	116230000	ENSG00000135269.13	2.45646e-09
chr7	115904052	rs4730723	T	C	chr7	115895000	115900000	chr7	116445000	116450000	ENSG00000135269.13	2.45646e-09
chr7	115904052	rs4730723	T	C	chr7	115895000	115900000	chr7	116450000	116455000	ENSG00000135269.13	2.45646e-09
chr13	44397815	rs9533634	T	C	chr13	44375000	44400000	chr13	43150000	43175000	ENSG00000179630.6	7.86433e-07
chr13	44397815	rs9533634	T	C	chr13	44375000	44400000	chr13	43525000	43550000	ENSG00000179630.6	7.86433e-07
chr13	44397815	rs9533634	T	C	chr13	44375000	44400000	chr13	43650000	43675000	ENSG00000179630.6	7.86433e-07
chr13	44457925	rs3764147	A	G	chr13	44450000	44460000	chr13	43560000	43570000	ENSG00000179630.6	1.00834e-06
Artery_Aorta
Adipose_Subcutaneous
chr2	232058493	rs2368563	A	G	chr2	232055000	232060000	chr2	231970000	231975000	ENSG00000204128.5	4.18425e-07
chr2	232058493	rs2368563	A	G	chr2	232060000	232065000	chr2	231970000	231975000	ENSG00000204128.5	4.18425e-07
chr2	232058493	rs2368563	A	G	chr2	232060000	232070000	chr2	231970000	231980000	ENSG00000204128.5	4.18425e-07
chr2	232060843	rs60664562	T	A	chr2	232055000	232060000	chr2	231970000	231975000	ENSG00000204128.5	2.46609e-07
chr2	232060843	rs60664562	T	A	chr2	232060000	232065000	chr2	231970000	231975000	ENSG00000204128.5	2.46609e-07
chr2	232060843	rs60664562	T	A	chr2	232060000	232070000	chr2	231970000	231980000	ENSG00000204128.5	2.46609e-07
chr2	232061520	rs62197322	A	G	chr2	232055000	232060000	chr2	231970000	231975000	ENSG00000204128.5	1.35588e-07
chr2	232061520	rs62197322	A	G	chr2	232060000	232065000	chr2	231970000	231975000	ENSG00000204128.5	1.35588e-07
chr2	232061520	rs62197322	A	G	chr2	232060000	232070000	chr2	231970000	231980000	ENSG00000204128.5	1.35588e-07
chr5	158706713	rs13153734	C	T	chr5	158700000	158710000	chr5	158590000	158600000	ENSG00000245812.2	1.67476e-05
chr5	158706713	rs13153734	C	T	chr5	158700000	158725000	chr5	158575000	158600000	ENSG00000245812.2	1.67476e-05
chr5	158706713	rs13153734	C	T	chr5	158700000	158725000	chr5	159375000	159400000	ENSG00000245812.2	1.67476e-05
chr5	158706713	rs13153734	C	T	chr5	158710000	158720000	chr5	159820000	159830000	ENSG00000245812.2	1.67476e-05
chr5	158710998	rs35046837	G	A	chr5	158700000	158710000	chr5	158590000	158600000	ENSG00000245812.2	1.61943e-05
chr5	158710998	rs35046837	G	A	chr5	158700000	158725000	chr5	158575000	158600000	ENSG00000245812.2	1.61943e-05
chr5	158710998	rs35046837	G	A	chr5	158700000	158725000	chr5	159375000	159400000	ENSG00000245812.2	1.61943e-05
chr5	158710998	rs35046837	G	A	chr5	158710000	158720000	chr5	159820000	159830000	ENSG00000245812.2	1.61943e-05
chr5	158717068	rs13161132	A	C	chr5	158700000	158725000	chr5	158575000	158600000	ENSG00000245812.2	1.37745e-05
chr5	158717068	rs13161132	A	C	chr5	158700000	158725000	chr5	159375000	159400000	ENSG00000245812.2	1.37745e-05
chr5	158717068	rs13161132	A	C	chr5	158710000	158720000	chr5	159820000	159830000	ENSG00000245812.2	1.37745e-05
chr5	158717994	rs62378747	C	T	chr5	158700000	158725000	chr5	158575000	158600000	ENSG00000245812.2	1.67476e-05
chr5	158717994	rs62378747	C	T	chr5	158700000	158725000	chr5	159375000	159400000	ENSG00000245812.2	1.67476e-05
chr5	158717994	rs62378747	C	T	chr5	158710000	158720000	chr5	159820000	159830000	ENSG00000245812.2	1.67476e-05
chr5	158723293	rs1529710	C	T	chr5	158700000	158725000	chr5	158575000	158600000	ENSG00000245812.2	1.67476e-05
chr5	158723293	rs1529710	C	T	chr5	158700000	158725000	chr5	159375000	159400000	ENSG00000245812.2	1.67476e-05
chr5	158723293	rs1529710	C	T	chr5	158710000	158720000	chr5	159820000	159830000	ENSG00000245812.2	1.67476e-05
chr5	158724949	rs2116820	C	T	chr5	158700000	158725000	chr5	158575000	158600000	ENSG00000245812.2	1.67476e-05
chr5	158724949	rs2116820	C	T	chr5	158700000	158725000	chr5	159375000	159400000	ENSG00000245812.2	1.67476e-05
chr5	158724949	rs2116820	C	T	chr5	158710000	158720000	chr5	159820000	159830000	ENSG00000245812.2	1.67476e-05
chr5	158728642	rs62378748	T	C	chr5	158700000	158725000	chr5	158575000	158600000	ENSG00000245812.2	2.34029e-05
chr5	158728642	rs62378748	T	C	chr5	158700000	158725000	chr5	159375000	159400000	ENSG00000245812.2	2.34029e-05
chr6	32606274	rs113219465	C	T	chr6	32610000	32620000	chr6	45660000	45670000	ENSG00000198502.5	1.04242e-05
chr6	32606274	rs113219465	C	T	chr6	32600000	32625000	chr6	45650000	45675000	ENSG00000198502.5	1.04242e-05
chr6	32608762	rs80154958	T	C	chr6	32610000	32620000	chr6	45660000	45670000	ENSG00000198502.5	7.67288e-06
chr6	32608762	rs80154958	T	C	chr6	32600000	32625000	chr6	45650000	45675000	ENSG00000198502.5	7.67288e-06
chr6	32610310	rs113551974	C	T	chr6	32610000	32620000	chr6	45660000	45670000	ENSG00000198502.5	7.67288e-06
chr6	32610310	rs113551974	C	T	chr6	32600000	32625000	chr6	45650000	45675000	ENSG00000198502.5	7.67288e-06
chr6	32611624	rs73409538	G	T	chr6	32610000	32620000	chr6	45660000	45670000	ENSG00000198502.5	2.08503e-05
chr6	32611624	rs73409538	G	T	chr6	32600000	32625000	chr6	45650000	45675000	ENSG00000198502.5	2.08503e-05
chr6	45886740	rs12665031	C	T	chr6	45890000	45895000	chr6	44435000	44440000	ENSG00000112782.11	5.14859e-05
chr6	45886740	rs12665031	C	T	chr6	45890000	45900000	chr6	44440000	44450000	ENSG00000112782.11	5.14859e-05
chr6	45886740	rs12665031	C	T	chr6	45890000	45895000	chr6	44560000	44565000	ENSG00000112782.11	5.14859e-05
chr6	45886740	rs12665031	C	T	chr6	45890000	45900000	chr6	44600000	44610000	ENSG00000112782.11	5.14859e-05
chr6	45886740	rs12665031	C	T	chr6	45890000	45895000	chr6	44620000	44625000	ENSG00000112782.11	5.14859e-05
chr6	45886740	rs12665031	C	T	chr6	45890000	45900000	chr6	44620000	44630000	ENSG00000112782.11	5.14859e-05
chr6	45886740	rs12665031	C	T	chr6	45890000	45895000	chr6	45385000	45390000	ENSG00000112782.11	5.14859e-05
chr6	45886740	rs12665031	C	T	chr6	45890000	45900000	chr6	45680000	45690000	ENSG00000112782.11	5.14859e-05
chr6	45886740	rs12665031	C	T	chr6	45875000	45900000	chr6	45375000	45400000	ENSG00000112782.11	5.14859e-05
chr6	45887270	rs3777548	G	A	chr6	45890000	45895000	chr6	44435000	44440000	ENSG00000112782.11	5.14859e-05
chr6	45887270	rs3777548	G	A	chr6	45890000	45900000	chr6	44440000	44450000	ENSG00000112782.11	5.14859e-05
chr6	45887270	rs3777548	G	A	chr6	45890000	45895000	chr6	44560000	44565000	ENSG00000112782.11	5.14859e-05
chr6	45887270	rs3777548	G	A	chr6	45890000	45900000	chr6	44600000	44610000	ENSG00000112782.11	5.14859e-05
chr6	45887270	rs3777548	G	A	chr6	45890000	45895000	chr6	44620000	44625000	ENSG00000112782.11	5.14859e-05
chr6	45887270	rs3777548	G	A	chr6	45890000	45900000	chr6	44620000	44630000	ENSG00000112782.11	5.14859e-05
chr6	45887270	rs3777548	G	A	chr6	45890000	45895000	chr6	45385000	45390000	ENSG00000112782.11	5.14859e-05
chr6	45887270	rs3777548	G	A	chr6	45890000	45900000	chr6	45680000	45690000	ENSG00000112782.11	5.14859e-05
chr6	45887270	rs3777548	G	A	chr6	45875000	45900000	chr6	45375000	45400000	ENSG00000112782.11	5.14859e-05
chr6	45887319	rs1361215	C	T	chr6	45890000	45895000	chr6	44435000	44440000	ENSG00000112782.11	5.14859e-05
chr6	45887319	rs1361215	C	T	chr6	45890000	45900000	chr6	44440000	44450000	ENSG00000112782.11	5.14859e-05
chr6	45887319	rs1361215	C	T	chr6	45890000	45895000	chr6	44560000	44565000	ENSG00000112782.11	5.14859e-05
chr6	45887319	rs1361215	C	T	chr6	45890000	45900000	chr6	44600000	44610000	ENSG00000112782.11	5.14859e-05
chr6	45887319	rs1361215	C	T	chr6	45890000	45895000	chr6	44620000	44625000	ENSG00000112782.11	5.14859e-05
chr6	45887319	rs1361215	C	T	chr6	45890000	45900000	chr6	44620000	44630000	ENSG00000112782.11	5.14859e-05
chr6	45887319	rs1361215	C	T	chr6	45890000	45895000	chr6	45385000	45390000	ENSG00000112782.11	5.14859e-05
chr6	45887319	rs1361215	C	T	chr6	45890000	45900000	chr6	45680000	45690000	ENSG00000112782.11	5.14859e-05
chr6	45887319	rs1361215	C	T	chr6	45875000	45900000	chr6	45375000	45400000	ENSG00000112782.11	5.14859e-05
chr6	45887421	rs1416167	A	T	chr6	45890000	45895000	chr6	44435000	44440000	ENSG00000112782.11	2.38156e-05
chr6	45887421	rs1416167	A	T	chr6	45890000	45900000	chr6	44440000	44450000	ENSG00000112782.11	2.38156e-05
chr6	45887421	rs1416167	A	T	chr6	45890000	45895000	chr6	44560000	44565000	ENSG00000112782.11	2.38156e-05
chr6	45887421	rs1416167	A	T	chr6	45890000	45900000	chr6	44600000	44610000	ENSG00000112782.11	2.38156e-05
chr6	45887421	rs1416167	A	T	chr6	45890000	45895000	chr6	44620000	44625000	ENSG00000112782.11	2.38156e-05
chr6	45887421	rs1416167	A	T	chr6	45890000	45900000	chr6	44620000	44630000	ENSG00000112782.11	2.38156e-05
chr6	45887421	rs1416167	A	T	chr6	45890000	45895000	chr6	45385000	45390000	ENSG00000112782.11	2.38156e-05
chr6	45887421	rs1416167	A	T	chr6	45890000	45900000	chr6	45680000	45690000	ENSG00000112782.11	2.38156e-05
chr6	45887421	rs1416167	A	T	chr6	45875000	45900000	chr6	45375000	45400000	ENSG00000112782.11	2.38156e-05
chr6	45887576	rs9369590	T	C	chr6	45890000	45895000	chr6	44435000	44440000	ENSG00000112782.11	5.14859e-05
chr6	45887576	rs9369590	T	C	chr6	45890000	45900000	chr6	44440000	44450000	ENSG00000112782.11	5.14859e-05
chr6	45887576	rs9369590	T	C	chr6	45890000	45895000	chr6	44560000	44565000	ENSG00000112782.11	5.14859e-05
chr6	45887576	rs9369590	T	C	chr6	45890000	45900000	chr6	44600000	44610000	ENSG00000112782.11	5.14859e-05
chr6	45887576	rs9369590	T	C	chr6	45890000	45895000	chr6	44620000	44625000	ENSG00000112782.11	5.14859e-05
chr6	45887576	rs9369590	T	C	chr6	45890000	45900000	chr6	44620000	44630000	ENSG00000112782.11	5.14859e-05
chr6	45887576	rs9369590	T	C	chr6	45890000	45895000	chr6	45385000	45390000	ENSG00000112782.11	5.14859e-05
chr6	45887576	rs9369590	T	C	chr6	45890000	45900000	chr6	45680000	45690000	ENSG00000112782.11	5.14859e-05
chr6	45887576	rs9369590	T	C	chr6	45875000	45900000	chr6	45375000	45400000	ENSG00000112782.11	5.14859e-05
chr6	45887643	rs3822876	G	T	chr6	45890000	45895000	chr6	44435000	44440000	ENSG00000112782.11	5.14859e-05
chr6	45887643	rs3822876	G	T	chr6	45890000	45900000	chr6	44440000	44450000	ENSG00000112782.11	5.14859e-05
chr6	45887643	rs3822876	G	T	chr6	45890000	45895000	chr6	44560000	44565000	ENSG00000112782.11	5.14859e-05
chr6	45887643	rs3822876	G	T	chr6	45890000	45900000	chr6	44600000	44610000	ENSG00000112782.11	5.14859e-05
chr6	45887643	rs3822876	G	T	chr6	45890000	45895000	chr6	44620000	44625000	ENSG00000112782.11	5.14859e-05
chr6	45887643	rs3822876	G	T	chr6	45890000	45900000	chr6	44620000	44630000	ENSG00000112782.11	5.14859e-05
chr6	45887643	rs3822876	G	T	chr6	45890000	45895000	chr6	45385000	45390000	ENSG00000112782.11	5.14859e-05
chr6	45887643	rs3822876	G	T	chr6	45890000	45900000	chr6	45680000	45690000	ENSG00000112782.11	5.14859e-05
chr6	45887643	rs3822876	G	T	chr6	45875000	45900000	chr6	45375000	45400000	ENSG00000112782.11	5.14859e-05
chr6	45887903	rs3822878	G	A	chr6	45890000	45895000	chr6	44435000	44440000	ENSG00000112782.11	5.14859e-05
chr6	45887903	rs3822878	G	A	chr6	45890000	45900000	chr6	44440000	44450000	ENSG00000112782.11	5.14859e-05
chr6	45887903	rs3822878	G	A	chr6	45890000	45895000	chr6	44560000	44565000	ENSG00000112782.11	5.14859e-05
chr6	45887903	rs3822878	G	A	chr6	45890000	45900000	chr6	44600000	44610000	ENSG00000112782.11	5.14859e-05
chr6	45887903	rs3822878	G	A	chr6	45890000	45895000	chr6	44620000	44625000	ENSG00000112782.11	5.14859e-05
chr6	45887903	rs3822878	G	A	chr6	45890000	45900000	chr6	44620000	44630000	ENSG00000112782.11	5.14859e-05
chr6	45887903	rs3822878	G	A	chr6	45890000	45895000	chr6	45385000	45390000	ENSG00000112782.11	5.14859e-05
chr6	45887903	rs3822878	G	A	chr6	45890000	45900000	chr6	45680000	45690000	ENSG00000112782.11	5.14859e-05
chr6	45887903	rs3822878	G	A	chr6	45875000	45900000	chr6	45375000	45400000	ENSG00000112782.11	5.14859e-05
chr6	45887922	rs3822879	A	T	chr6	45890000	45895000	chr6	44435000	44440000	ENSG00000112782.11	5.14859e-05
chr6	45887922	rs3822879	A	T	chr6	45890000	45900000	chr6	44440000	44450000	ENSG00000112782.11	5.14859e-05
chr6	45887922	rs3822879	A	T	chr6	45890000	45895000	chr6	44560000	44565000	ENSG00000112782.11	5.14859e-05
chr6	45887922	rs3822879	A	T	chr6	45890000	45900000	chr6	44600000	44610000	ENSG00000112782.11	5.14859e-05
chr6	45887922	rs3822879	A	T	chr6	45890000	45895000	chr6	44620000	44625000	ENSG00000112782.11	5.14859e-05
chr6	45887922	rs3822879	A	T	chr6	45890000	45900000	chr6	44620000	44630000	ENSG00000112782.11	5.14859e-05
chr6	45887922	rs3822879	A	T	chr6	45890000	45895000	chr6	45385000	45390000	ENSG00000112782.11	5.14859e-05
chr6	45887922	rs3822879	A	T	chr6	45890000	45900000	chr6	45680000	45690000	ENSG00000112782.11	5.14859e-05
chr6	45887922	rs3822879	A	T	chr6	45875000	45900000	chr6	45375000	45400000	ENSG00000112782.11	5.14859e-05
chr6	45887939	rs3822880	C	T	chr6	45890000	45895000	chr6	44435000	44440000	ENSG00000112782.11	5.11206e-05
chr6	45887939	rs3822880	C	T	chr6	45890000	45900000	chr6	44440000	44450000	ENSG00000112782.11	5.11206e-05
chr6	45887939	rs3822880	C	T	chr6	45890000	45895000	chr6	44560000	44565000	ENSG00000112782.11	5.11206e-05
chr6	45887939	rs3822880	C	T	chr6	45890000	45900000	chr6	44600000	44610000	ENSG00000112782.11	5.11206e-05
chr6	45887939	rs3822880	C	T	chr6	45890000	45895000	chr6	44620000	44625000	ENSG00000112782.11	5.11206e-05
chr6	45887939	rs3822880	C	T	chr6	45890000	45900000	chr6	44620000	44630000	ENSG00000112782.11	5.11206e-05
chr6	45887939	rs3822880	C	T	chr6	45890000	45895000	chr6	45385000	45390000	ENSG00000112782.11	5.11206e-05
chr6	45887939	rs3822880	C	T	chr6	45890000	45900000	chr6	45680000	45690000	ENSG00000112782.11	5.11206e-05
chr6	45887939	rs3822880	C	T	chr6	45875000	45900000	chr6	45375000	45400000	ENSG00000112782.11	5.11206e-05
chr6	45888022	rs3822881	A	T	chr6	45890000	45895000	chr6	44435000	44440000	ENSG00000112782.11	5.14859e-05
chr6	45888022	rs3822881	A	T	chr6	45890000	45900000	chr6	44440000	44450000	ENSG00000112782.11	5.14859e-05
chr6	45888022	rs3822881	A	T	chr6	45890000	45895000	chr6	44560000	44565000	ENSG00000112782.11	5.14859e-05
chr6	45888022	rs3822881	A	T	chr6	45890000	45900000	chr6	44600000	44610000	ENSG00000112782.11	5.14859e-05
chr6	45888022	rs3822881	A	T	chr6	45890000	45895000	chr6	44620000	44625000	ENSG00000112782.11	5.14859e-05
chr6	45888022	rs3822881	A	T	chr6	45890000	45900000	chr6	44620000	44630000	ENSG00000112782.11	5.14859e-05
chr6	45888022	rs3822881	A	T	chr6	45890000	45895000	chr6	45385000	45390000	ENSG00000112782.11	5.14859e-05
chr6	45888022	rs3822881	A	T	chr6	45890000	45900000	chr6	45680000	45690000	ENSG00000112782.11	5.14859e-05
chr6	45888022	rs3822881	A	T	chr6	45875000	45900000	chr6	45375000	45400000	ENSG00000112782.11	5.14859e-05
chr6	45888073	rs3729618	A	G	chr6	45890000	45895000	chr6	44435000	44440000	ENSG00000112782.11	5.14859e-05
chr6	45888073	rs3729618	A	G	chr6	45890000	45900000	chr6	44440000	44450000	ENSG00000112782.11	5.14859e-05
chr6	45888073	rs3729618	A	G	chr6	45890000	45895000	chr6	44560000	44565000	ENSG00000112782.11	5.14859e-05
chr6	45888073	rs3729618	A	G	chr6	45890000	45900000	chr6	44600000	44610000	ENSG00000112782.11	5.14859e-05
chr6	45888073	rs3729618	A	G	chr6	45890000	45895000	chr6	44620000	44625000	ENSG00000112782.11	5.14859e-05
chr6	45888073	rs3729618	A	G	chr6	45890000	45900000	chr6	44620000	44630000	ENSG00000112782.11	5.14859e-05
chr6	45888073	rs3729618	A	G	chr6	45890000	45895000	chr6	45385000	45390000	ENSG00000112782.11	5.14859e-05
chr6	45888073	rs3729618	A	G	chr6	45890000	45900000	chr6	45680000	45690000	ENSG00000112782.11	5.14859e-05
chr6	45888073	rs3729618	A	G	chr6	45875000	45900000	chr6	45375000	45400000	ENSG00000112782.11	5.14859e-05
chr6	45889793	rs12204991	A	T	chr6	45890000	45895000	chr6	44435000	44440000	ENSG00000112782.11	3.51278e-05
chr6	45889793	rs12204991	A	T	chr6	45890000	45900000	chr6	44440000	44450000	ENSG00000112782.11	3.51278e-05
chr6	45889793	rs12204991	A	T	chr6	45890000	45895000	chr6	44560000	44565000	ENSG00000112782.11	3.51278e-05
chr6	45889793	rs12204991	A	T	chr6	45890000	45900000	chr6	44600000	44610000	ENSG00000112782.11	3.51278e-05
chr6	45889793	rs12204991	A	T	chr6	45890000	45895000	chr6	44620000	44625000	ENSG00000112782.11	3.51278e-05
chr6	45889793	rs12204991	A	T	chr6	45890000	45900000	chr6	44620000	44630000	ENSG00000112782.11	3.51278e-05
chr6	45889793	rs12204991	A	T	chr6	45890000	45895000	chr6	45385000	45390000	ENSG00000112782.11	3.51278e-05
chr6	45889793	rs12204991	A	T	chr6	45890000	45900000	chr6	45680000	45690000	ENSG00000112782.11	3.51278e-05
chr6	45889793	rs12204991	A	T	chr6	45875000	45900000	chr6	45375000	45400000	ENSG00000112782.11	3.51278e-05
chr6	45892487	rs9367229	T	C	chr6	45895000	45900000	chr6	46375000	46380000	ENSG00000112782.11	3.53831e-05
chr6	45892487	rs9367229	T	C	chr6	45890000	45895000	chr6	44435000	44440000	ENSG00000112782.11	3.53831e-05
chr6	45892487	rs9367229	T	C	chr6	45890000	45900000	chr6	44440000	44450000	ENSG00000112782.11	3.53831e-05
chr6	45892487	rs9367229	T	C	chr6	45890000	45895000	chr6	44560000	44565000	ENSG00000112782.11	3.53831e-05
chr6	45892487	rs9367229	T	C	chr6	45890000	45900000	chr6	44600000	44610000	ENSG00000112782.11	3.53831e-05
chr6	45892487	rs9367229	T	C	chr6	45890000	45895000	chr6	44620000	44625000	ENSG00000112782.11	3.53831e-05
chr6	45892487	rs9367229	T	C	chr6	45890000	45900000	chr6	44620000	44630000	ENSG00000112782.11	3.53831e-05
chr6	45892487	rs9367229	T	C	chr6	45890000	45895000	chr6	45385000	45390000	ENSG00000112782.11	3.53831e-05
chr6	45892487	rs9367229	T	C	chr6	45890000	45900000	chr6	45680000	45690000	ENSG00000112782.11	3.53831e-05
chr6	45892487	rs9367229	T	C	chr6	45875000	45900000	chr6	45375000	45400000	ENSG00000112782.11	3.53831e-05
chr7	26702506	rs757129	C	G	chr7	26700000	26725000	chr7	26100000	26125000	ENSG00000122592.6	2.6823e-05
chr7	26702506	rs757129	C	G	chr7	26700000	26710000	chr7	26130000	26140000	ENSG00000122592.6	2.6823e-05
chr7	26702506	rs757129	C	G	chr7	26700000	26725000	chr7	26225000	26250000	ENSG00000122592.6	2.6823e-05
chr7	26702506	rs757129	C	G	chr7	26705000	26710000	chr7	25930000	25935000	ENSG00000122592.6	2.6823e-05
chr7	26702506	rs757129	C	G	chr7	26705000	26710000	chr7	26405000	26410000	ENSG00000122592.6	2.6823e-05
chr7	26702506	rs757129	C	G	chr7	26705000	26710000	chr7	26410000	26415000	ENSG00000122592.6	2.6823e-05
chr7	115897222	rs2402058	A	G	chr7	115890000	115900000	chr7	116160000	116170000	ENSG00000237870.2	6.55552e-06
chr7	115897222	rs2402058	A	G	chr7	115890000	115900000	chr7	116440000	116450000	ENSG00000237870.2	6.55552e-06
chr7	115897222	rs2402058	A	G	chr7	115895000	115900000	chr7	116225000	116230000	ENSG00000237870.2	6.55552e-06
chr7	115897222	rs2402058	A	G	chr7	115895000	115900000	chr7	116445000	116450000	ENSG00000237870.2	6.55552e-06
chr7	115897222	rs2402058	A	G	chr7	115895000	115900000	chr7	116450000	116455000	ENSG00000237870.2	6.55552e-06
chr7	115897242	rs2402059	T	G	chr7	115890000	115900000	chr7	116160000	116170000	ENSG00000237870.2	6.55552e-06
chr7	115897242	rs2402059	T	G	chr7	115890000	115900000	chr7	116440000	116450000	ENSG00000237870.2	6.55552e-06
chr7	115897242	rs2402059	T	G	chr7	115895000	115900000	chr7	116225000	116230000	ENSG00000237870.2	6.55552e-06
chr7	115897242	rs2402059	T	G	chr7	115895000	115900000	chr7	116445000	116450000	ENSG00000237870.2	6.55552e-06
chr7	115897242	rs2402059	T	G	chr7	115895000	115900000	chr7	116450000	116455000	ENSG00000237870.2	6.55552e-06
chr7	115899335	rs4730721	T	A	chr7	115890000	115900000	chr7	116160000	116170000	ENSG00000237870.2	8.33831e-06
chr7	115899335	rs4730721	T	A	chr7	115890000	115900000	chr7	116440000	116450000	ENSG00000237870.2	8.33831e-06
chr7	115899335	rs4730721	T	A	chr7	115895000	115900000	chr7	116225000	116230000	ENSG00000237870.2	8.33831e-06
chr7	115899335	rs4730721	T	A	chr7	115895000	115900000	chr7	116445000	116450000	ENSG00000237870.2	8.33831e-06
chr7	115899335	rs4730721	T	A	chr7	115895000	115900000	chr7	116450000	116455000	ENSG00000237870.2	8.33831e-06
chr7	115900262	rs10242959	C	T	chr7	115890000	115900000	chr7	116160000	116170000	ENSG00000237870.2	4.85148e-06
chr7	115900262	rs10242959	C	T	chr7	115890000	115900000	chr7	116440000	116450000	ENSG00000237870.2	4.85148e-06
chr7	115900262	rs10242959	C	T	chr7	115895000	115900000	chr7	116225000	116230000	ENSG00000237870.2	4.85148e-06
chr7	115900262	rs10242959	C	T	chr7	115895000	115900000	chr7	116445000	116450000	ENSG00000237870.2	4.85148e-06
chr7	115900262	rs10242959	C	T	chr7	115895000	115900000	chr7	116450000	116455000	ENSG00000237870.2	4.85148e-06
chr7	115900353	rs10261531	T	A	chr7	115890000	115900000	chr7	116160000	116170000	ENSG00000237870.2	5.07857e-06
chr7	115900353	rs10261531	T	A	chr7	115890000	115900000	chr7	116440000	116450000	ENSG00000237870.2	5.07857e-06
chr7	115900353	rs10261531	T	A	chr7	115895000	115900000	chr7	116225000	116230000	ENSG00000237870.2	5.07857e-06
chr7	115900353	rs10261531	T	A	chr7	115895000	115900000	chr7	116445000	116450000	ENSG00000237870.2	5.07857e-06
chr7	115900353	rs10261531	T	A	chr7	115895000	115900000	chr7	116450000	116455000	ENSG00000237870.2	5.07857e-06
chr7	115900724	rs10500061	C	G	chr7	115890000	115900000	chr7	116160000	116170000	ENSG00000237870.2	4.93285e-06
chr7	115900724	rs10500061	C	G	chr7	115890000	115900000	chr7	116440000	116450000	ENSG00000237870.2	4.93285e-06
chr7	115900724	rs10500061	C	G	chr7	115895000	115900000	chr7	116225000	116230000	ENSG00000237870.2	4.93285e-06
chr7	115900724	rs10500061	C	G	chr7	115895000	115900000	chr7	116445000	116450000	ENSG00000237870.2	4.93285e-06
chr7	115900724	rs10500061	C	G	chr7	115895000	115900000	chr7	116450000	116455000	ENSG00000237870.2	4.93285e-06
chr7	115900820	rs60927526	T	G	chr7	115890000	115900000	chr7	116160000	116170000	ENSG00000237870.2	8.08256e-06
chr7	115900820	rs60927526	T	G	chr7	115890000	115900000	chr7	116440000	116450000	ENSG00000237870.2	8.08256e-06
chr7	115900820	rs60927526	T	G	chr7	115895000	115900000	chr7	116225000	116230000	ENSG00000237870.2	8.08256e-06
chr7	115900820	rs60927526	T	G	chr7	115895000	115900000	chr7	116445000	116450000	ENSG00000237870.2	8.08256e-06
chr7	115900820	rs60927526	T	G	chr7	115895000	115900000	chr7	116450000	116455000	ENSG00000237870.2	8.08256e-06
chr11	64129722	rs538147	G	A	chr11	64130000	64140000	chr11	64410000	64420000	ENSG00000236935.1	2.06215e-05
chr11	64412891	rs11820322	C	T	chr11	64410000	64420000	chr11	64130000	64140000	ENSG00000110076.14	1.76616e-05
chr11	64412891	rs11820322	C	T	chr11	64410000	64420000	chr11	64320000	64330000	ENSG00000110076.14	1.76616e-05
chr14	96030442	rs7152619	T	C	chr14	96030000	96040000	chr14	96460000	96470000	ENSG00000182512.4	9.34469e-06
chr14	96030442	rs7152619	T	C	chr14	96020000	96030000	chr14	96460000	96470000	ENSG00000182512.4	9.34469e-06
chr14	96030442	rs7152619	T	C	chr14	96025000	96030000	chr14	96460000	96465000	ENSG00000182512.4	9.34469e-06
chr14	96030763	rs8014367	C	T	chr14	96030000	96040000	chr14	96460000	96470000	ENSG00000182512.4	1.68764e-05
chr14	96030763	rs8014367	C	T	chr14	96020000	96030000	chr14	96460000	96470000	ENSG00000182512.4	1.68764e-05
chr14	96030763	rs8014367	C	T	chr14	96025000	96030000	chr14	96460000	96465000	ENSG00000182512.4	1.68764e-05
chr14	96031957	rs9323929	C	T	chr14	96030000	96040000	chr14	96460000	96470000	ENSG00000182512.4	2.0606e-05
chr14	96031957	rs9323929	C	T	chr14	96020000	96030000	chr14	96460000	96470000	ENSG00000182512.4	2.0606e-05
chr14	96031957	rs9323929	C	T	chr14	96025000	96030000	chr14	96460000	96465000	ENSG00000182512.4	2.0606e-05
chr20	13786587	rs6079180	A	G	chr20	13790000	13800000	chr20	14030000	14040000	ENSG00000101247.13	8.06001e-28
Adipose_Visceral_Omentum
chr2	232058493	rs2368563	A	G	chr2	232055000	232060000	chr2	231970000	231975000	ENSG00000204128.5	2.23288e-08
chr2	232058493	rs2368563	A	G	chr2	232060000	232065000	chr2	231970000	231975000	ENSG00000204128.5	2.23288e-08
chr2	232058493	rs2368563	A	G	chr2	232060000	232070000	chr2	231970000	231980000	ENSG00000204128.5	2.23288e-08
chr2	232060843	rs60664562	T	A	chr2	232055000	232060000	chr2	231970000	231975000	ENSG00000204128.5	6.29418e-09
chr2	232060843	rs60664562	T	A	chr2	232060000	232065000	chr2	231970000	231975000	ENSG00000204128.5	6.29418e-09
chr2	232060843	rs60664562	T	A	chr2	232060000	232070000	chr2	231970000	231980000	ENSG00000204128.5	6.29418e-09
chr2	232061520	rs62197322	A	G	chr2	232055000	232060000	chr2	231970000	231975000	ENSG00000204128.5	1.5487e-08
chr2	232061520	rs62197322	A	G	chr2	232060000	232065000	chr2	231970000	231975000	ENSG00000204128.5	1.5487e-08
chr2	232061520	rs62197322	A	G	chr2	232060000	232070000	chr2	231970000	231980000	ENSG00000204128.5	1.5487e-08
chr6	32606274	rs113219465	C	T	chr6	32610000	32620000	chr6	45660000	45670000	ENSG00000198502.5	7.66474e-06
chr6	32606274	rs113219465	C	T	chr6	32600000	32625000	chr6	45650000	45675000	ENSG00000198502.5	7.66474e-06
chr6	32608762	rs80154958	T	C	chr6	32610000	32620000	chr6	45660000	45670000	ENSG00000198502.5	5.85733e-06
chr6	32608762	rs80154958	T	C	chr6	32600000	32625000	chr6	45650000	45675000	ENSG00000198502.5	5.85733e-06
chr6	32610310	rs113551974	C	T	chr6	32610000	32620000	chr6	45660000	45670000	ENSG00000198502.5	5.85733e-06
chr6	32610310	rs113551974	C	T	chr6	32600000	32625000	chr6	45650000	45675000	ENSG00000198502.5	5.85733e-06
chr6	32611624	rs73409538	G	T	chr6	32610000	32620000	chr6	45660000	45670000	ENSG00000198502.5	5.85733e-06
chr6	32611624	rs73409538	G	T	chr6	32600000	32625000	chr6	45650000	45675000	ENSG00000198502.5	5.85733e-06
chr6	32629931	rs41542812	C	G	chr6	32600000	32625000	chr6	45650000	45675000	ENSG00000198502.5	1.38236e-05
chr7	115860783	rs1004107	A	T	chr7	115865000	115870000	chr7	115830000	115835000	ENSG00000135269.13	4.85512e-05
chr7	115861660	rs9969224	T	C	chr7	115865000	115870000	chr7	115830000	115835000	ENSG00000135269.13	4.85512e-05
chr7	115862902	rs1000966	A	G	chr7	115865000	115870000	chr7	115830000	115835000	ENSG00000135269.13	4.85512e-05
chr7	115863446	rs3807968	G	A	chr7	115865000	115870000	chr7	115830000	115835000	ENSG00000135269.13	4.85512e-05
chr7	115880277	rs3807975	G	A	chr7	115870000	115880000	chr7	115810000	115820000	ENSG00000135269.13	4.66283e-05
chr7	115880277	rs3807975	G	A	chr7	115875000	115880000	chr7	115815000	115820000	ENSG00000135269.13	4.66283e-05
chr7	115881159	rs66652906	G	A	chr7	115870000	115880000	chr7	115810000	115820000	ENSG00000135269.13	3.99571e-05
chr7	115881159	rs66652906	G	A	chr7	115875000	115880000	chr7	115815000	115820000	ENSG00000135269.13	3.99571e-05
chr7	115881458	rs58595078	A	G	chr7	115870000	115880000	chr7	115810000	115820000	ENSG00000135269.13	4.85512e-05
chr7	115881458	rs58595078	A	G	chr7	115875000	115880000	chr7	115815000	115820000	ENSG00000135269.13	4.85512e-05
chr7	115892650	rs1048508	T	G	chr7	115890000	115900000	chr7	116160000	116170000	ENSG00000135269.13	4.28575e-05
chr7	115892650	rs1048508	T	G	chr7	115890000	115900000	chr7	116440000	116450000	ENSG00000135269.13	4.28575e-05
chr7	115892650	rs1048508	T	G	chr7	115895000	115900000	chr7	116225000	116230000	ENSG00000135269.13	4.28575e-05
chr7	115892650	rs1048508	T	G	chr7	115895000	115900000	chr7	116445000	116450000	ENSG00000135269.13	4.28575e-05
chr7	115892650	rs1048508	T	G	chr7	115895000	115900000	chr7	116450000	116455000	ENSG00000135269.13	4.28575e-05
chr7	115892738	rs17138472	A	G	chr7	115890000	115900000	chr7	116160000	116170000	ENSG00000135269.13	4.19706e-05
chr7	115892738	rs17138472	A	G	chr7	115890000	115900000	chr7	116440000	116450000	ENSG00000135269.13	4.19706e-05
chr7	115892738	rs17138472	A	G	chr7	115895000	115900000	chr7	116225000	116230000	ENSG00000135269.13	4.19706e-05
chr7	115892738	rs17138472	A	G	chr7	115895000	115900000	chr7	116445000	116450000	ENSG00000135269.13	4.19706e-05
chr7	115892738	rs17138472	A	G	chr7	115895000	115900000	chr7	116450000	116455000	ENSG00000135269.13	4.19706e-05
chr7	115893647	rs3807980	A	G	chr7	115890000	115900000	chr7	116160000	116170000	ENSG00000135269.13	4.28575e-05
chr7	115893647	rs3807980	A	G	chr7	115890000	115900000	chr7	116440000	116450000	ENSG00000135269.13	4.28575e-05
chr7	115893647	rs3807980	A	G	chr7	115895000	115900000	chr7	116225000	116230000	ENSG00000135269.13	4.28575e-05
chr7	115893647	rs3807980	A	G	chr7	115895000	115900000	chr7	116445000	116450000	ENSG00000135269.13	4.28575e-05
chr7	115893647	rs3807980	A	G	chr7	115895000	115900000	chr7	116450000	116455000	ENSG00000135269.13	4.28575e-05
chr7	115894403	rs17138486	C	G	chr7	115890000	115900000	chr7	116160000	116170000	ENSG00000135269.13	4.42024e-05
chr7	115894403	rs17138486	C	G	chr7	115890000	115900000	chr7	116440000	116450000	ENSG00000135269.13	4.42024e-05
chr7	115894403	rs17138486	C	G	chr7	115895000	115900000	chr7	116225000	116230000	ENSG00000135269.13	4.42024e-05
chr7	115894403	rs17138486	C	G	chr7	115895000	115900000	chr7	116445000	116450000	ENSG00000135269.13	4.42024e-05
chr7	115894403	rs17138486	C	G	chr7	115895000	115900000	chr7	116450000	116455000	ENSG00000135269.13	4.42024e-05
chr7	115897871	rs2896180	A	G	chr7	115890000	115900000	chr7	116160000	116170000	ENSG00000135269.13	4.70289e-05
chr7	115897871	rs2896180	A	G	chr7	115890000	115900000	chr7	116440000	116450000	ENSG00000135269.13	4.70289e-05
chr7	115897871	rs2896180	A	G	chr7	115895000	115900000	chr7	116225000	116230000	ENSG00000135269.13	4.70289e-05
chr7	115897871	rs2896180	A	G	chr7	115895000	115900000	chr7	116445000	116450000	ENSG00000135269.13	4.70289e-05
chr7	115897871	rs2896180	A	G	chr7	115895000	115900000	chr7	116450000	116455000	ENSG00000135269.13	4.70289e-05
chr7	115897884	rs2896181	C	T	chr7	115890000	115900000	chr7	116160000	116170000	ENSG00000135269.13	4.70289e-05
chr7	115897884	rs2896181	C	T	chr7	115890000	115900000	chr7	116440000	116450000	ENSG00000135269.13	4.70289e-05
chr7	115897884	rs2896181	C	T	chr7	115895000	115900000	chr7	116225000	116230000	ENSG00000135269.13	4.70289e-05
chr7	115897884	rs2896181	C	T	chr7	115895000	115900000	chr7	116445000	116450000	ENSG00000135269.13	4.70289e-05
chr7	115897884	rs2896181	C	T	chr7	115895000	115900000	chr7	116450000	116455000	ENSG00000135269.13	4.70289e-05
chr7	115900686	rs10500060	C	T	chr7	115890000	115900000	chr7	116160000	116170000	ENSG00000135269.13	4.27114e-05
chr7	115900686	rs10500060	C	T	chr7	115890000	115900000	chr7	116440000	116450000	ENSG00000135269.13	4.27114e-05
chr7	115900686	rs10500060	C	T	chr7	115895000	115900000	chr7	116225000	116230000	ENSG00000135269.13	4.27114e-05
chr7	115900686	rs10500060	C	T	chr7	115895000	115900000	chr7	116445000	116450000	ENSG00000135269.13	4.27114e-05
chr7	115900686	rs10500060	C	T	chr7	115895000	115900000	chr7	116450000	116455000	ENSG00000135269.13	4.27114e-05
chr11	64129722	rs538147	G	A	chr11	64130000	64140000	chr11	64410000	64420000	ENSG00000236935.1	7.0337e-07
chr13	44397815	rs9533634	T	C	chr13	44375000	44400000	chr13	43150000	43175000	ENSG00000151773.8	3.16032e-09
chr13	44397815	rs9533634	T	C	chr13	44375000	44400000	chr13	43525000	43550000	ENSG00000151773.8	3.16032e-09
chr13	44397815	rs9533634	T	C	chr13	44375000	44400000	chr13	43650000	43675000	ENSG00000151773.8	3.16032e-09
chr13	44457925	rs3764147	A	G	chr13	44450000	44460000	chr13	43560000	43570000	ENSG00000151773.8	1.8577e-08
chr14	90858484	rs7150626	C	T	chr14	90850000	90860000	chr14	90420000	90430000	ENSG00000198668.6	2.64288e-06
chr14	90858484	rs7150626	C	T	chr14	90860000	90870000	chr14	91220000	91230000	ENSG00000198668.6	2.64288e-06
chr16	57452165	rs188872	A	G	chr16	57445000	57450000	chr16	57335000	57340000	ENSG00000005194.10	1.92362e-07
chr16	57452165	rs188872	A	G	chr16	57450000	57460000	chr16	57550000	57560000	ENSG00000005194.10	1.92362e-07
chr16	57452165	rs188872	A	G	chr16	57455000	57460000	chr16	57335000	57340000	ENSG00000005194.10	1.92362e-07
chr20	13786587	rs6079180	A	G	chr20	13790000	13800000	chr20	14030000	14040000	ENSG00000101247.13	1.17488e-12
AdreTl_Gland
chr7	115860783	rs1004107	A	T	chr7	115865000	115870000	chr7	115830000	115835000	ENSG00000135269.13	1.00525e-10
chr7	115861660	rs9969224	T	C	chr7	115865000	115870000	chr7	115830000	115835000	ENSG00000135269.13	1.00525e-10
chr7	115862296	rs1004109	A	T	chr7	115865000	115870000	chr7	115830000	115835000	ENSG00000135269.13	9.40764e-11
chr7	115862902	rs1000966	A	G	chr7	115865000	115870000	chr7	115830000	115835000	ENSG00000135269.13	1.40716e-10
chr7	115863446	rs3807968	G	A	chr7	115865000	115870000	chr7	115830000	115835000	ENSG00000135269.13	1.00525e-10
chr7	115864889	rs3779509	C	A	chr7	115865000	115870000	chr7	115830000	115835000	ENSG00000135269.13	9.0732e-11
chr7	115866354	rs1881287	A	G	chr7	115870000	115880000	chr7	115810000	115820000	ENSG00000135269.13	9.0732e-11
chr7	115866354	rs1881287	A	G	chr7	115865000	115870000	chr7	115830000	115835000	ENSG00000135269.13	9.0732e-11
chr7	115868798	rs58624059	T	C	chr7	115870000	115880000	chr7	115810000	115820000	ENSG00000135269.13	5.19595e-11
chr7	115868798	rs58624059	T	C	chr7	115865000	115870000	chr7	115830000	115835000	ENSG00000135269.13	5.19595e-11
chr7	115874466	rs12670683	T	C	chr7	115870000	115880000	chr7	115810000	115820000	ENSG00000135269.13	9.26489e-11
chr7	115874466	rs12670683	T	C	chr7	115875000	115880000	chr7	115815000	115820000	ENSG00000135269.13	9.26489e-11
chr7	115874466	rs12670683	T	C	chr7	115865000	115870000	chr7	115830000	115835000	ENSG00000135269.13	9.26489e-11
chr7	115874560	rs2030978	C	T	chr7	115870000	115880000	chr7	115810000	115820000	ENSG00000135269.13	9.0732e-11
chr7	115874560	rs2030978	C	T	chr7	115875000	115880000	chr7	115815000	115820000	ENSG00000135269.13	9.0732e-11
chr7	115874560	rs2030978	C	T	chr7	115865000	115870000	chr7	115830000	115835000	ENSG00000135269.13	9.0732e-11
chr7	115875359	rs2030977	G	C	chr7	115870000	115880000	chr7	115810000	115820000	ENSG00000135269.13	9.0732e-11
chr7	115875359	rs2030977	G	C	chr7	115875000	115880000	chr7	115815000	115820000	ENSG00000135269.13	9.0732e-11
chr7	115876365	rs6959237	C	T	chr7	115870000	115880000	chr7	115810000	115820000	ENSG00000135269.13	9.0732e-11
chr7	115876365	rs6959237	C	T	chr7	115875000	115880000	chr7	115815000	115820000	ENSG00000135269.13	9.0732e-11
chr7	115880277	rs3807975	G	A	chr7	115870000	115880000	chr7	115810000	115820000	ENSG00000135269.13	9.0732e-11
chr7	115880277	rs3807975	G	A	chr7	115875000	115880000	chr7	115815000	115820000	ENSG00000135269.13	9.0732e-11
chr7	115881159	rs66652906	G	A	chr7	115870000	115880000	chr7	115810000	115820000	ENSG00000135269.13	9.52337e-11
chr7	115881159	rs66652906	G	A	chr7	115875000	115880000	chr7	115815000	115820000	ENSG00000135269.13	9.52337e-11
chr7	115881458	rs58595078	A	G	chr7	115870000	115880000	chr7	115810000	115820000	ENSG00000135269.13	1.00525e-10
chr7	115881458	rs58595078	A	G	chr7	115875000	115880000	chr7	115815000	115820000	ENSG00000135269.13	1.00525e-10
chr7	115882323	rs3757730	G	A	chr7	115870000	115880000	chr7	115810000	115820000	ENSG00000135269.13	9.0732e-11
chr7	115882323	rs3757730	G	A	chr7	115875000	115880000	chr7	115815000	115820000	ENSG00000135269.13	9.0732e-11
chr7	115883453	rs57321537	T	G	chr7	115870000	115880000	chr7	115810000	115820000	ENSG00000135269.13	1.12157e-10
chr7	115883453	rs57321537	T	G	chr7	115875000	115880000	chr7	115815000	115820000	ENSG00000135269.13	1.12157e-10
chr7	115884319	rs138623810	C	A	chr7	115870000	115880000	chr7	115810000	115820000	ENSG00000135269.13	9.0732e-11
chr7	115884319	rs138623810	C	A	chr7	115875000	115880000	chr7	115815000	115820000	ENSG00000135269.13	9.0732e-11
chr7	115886079	rs7811984	A	G	chr7	115890000	115900000	chr7	116160000	116170000	ENSG00000135269.13	9.0732e-11
chr7	115886079	rs7811984	A	G	chr7	115890000	115900000	chr7	116440000	116450000	ENSG00000135269.13	9.0732e-11
chr7	115888162	rs6953050	A	G	chr7	115890000	115900000	chr7	116160000	116170000	ENSG00000135269.13	9.0732e-11
chr7	115888162	rs6953050	A	G	chr7	115890000	115900000	chr7	116440000	116450000	ENSG00000135269.13	9.0732e-11
chr7	115888339	rs6957561	G	A	chr7	115890000	115900000	chr7	116160000	116170000	ENSG00000135269.13	9.0732e-11
chr7	115888339	rs6957561	G	A	chr7	115890000	115900000	chr7	116440000	116450000	ENSG00000135269.13	9.0732e-11
chr7	115892650	rs1048508	T	G	chr7	115890000	115900000	chr7	116160000	116170000	ENSG00000135269.13	3.75809e-11
chr7	115892650	rs1048508	T	G	chr7	115890000	115900000	chr7	116440000	116450000	ENSG00000135269.13	3.75809e-11
chr7	115892650	rs1048508	T	G	chr7	115895000	115900000	chr7	116225000	116230000	ENSG00000135269.13	3.75809e-11
chr7	115892650	rs1048508	T	G	chr7	115895000	115900000	chr7	116445000	116450000	ENSG00000135269.13	3.75809e-11
chr7	115892650	rs1048508	T	G	chr7	115895000	115900000	chr7	116450000	116455000	ENSG00000135269.13	3.75809e-11
chr7	115892738	rs17138472	A	G	chr7	115890000	115900000	chr7	116160000	116170000	ENSG00000135269.13	3.75809e-11
chr7	115892738	rs17138472	A	G	chr7	115890000	115900000	chr7	116440000	116450000	ENSG00000135269.13	3.75809e-11
chr7	115892738	rs17138472	A	G	chr7	115895000	115900000	chr7	116225000	116230000	ENSG00000135269.13	3.75809e-11
chr7	115892738	rs17138472	A	G	chr7	115895000	115900000	chr7	116445000	116450000	ENSG00000135269.13	3.75809e-11
chr7	115892738	rs17138472	A	G	chr7	115895000	115900000	chr7	116450000	116455000	ENSG00000135269.13	3.75809e-11
chr7	115893407	rs3823977	A	T	chr7	115890000	115900000	chr7	116160000	116170000	ENSG00000135269.13	1.91881e-11
chr7	115893407	rs3823977	A	T	chr7	115890000	115900000	chr7	116440000	116450000	ENSG00000135269.13	1.91881e-11
chr7	115893407	rs3823977	A	T	chr7	115895000	115900000	chr7	116225000	116230000	ENSG00000135269.13	1.91881e-11
chr7	115893407	rs3823977	A	T	chr7	115895000	115900000	chr7	116445000	116450000	ENSG00000135269.13	1.91881e-11
chr7	115893407	rs3823977	A	T	chr7	115895000	115900000	chr7	116450000	116455000	ENSG00000135269.13	1.91881e-11
chr7	115893647	rs3807980	A	G	chr7	115890000	115900000	chr7	116160000	116170000	ENSG00000135269.13	3.75809e-11
chr7	115893647	rs3807980	A	G	chr7	115890000	115900000	chr7	116440000	116450000	ENSG00000135269.13	3.75809e-11
chr7	115893647	rs3807980	A	G	chr7	115895000	115900000	chr7	116225000	116230000	ENSG00000135269.13	3.75809e-11
chr7	115893647	rs3807980	A	G	chr7	115895000	115900000	chr7	116445000	116450000	ENSG00000135269.13	3.75809e-11
chr7	115893647	rs3807980	A	G	chr7	115895000	115900000	chr7	116450000	116455000	ENSG00000135269.13	3.75809e-11
chr7	115893845	rs17138483	A	C	chr7	115890000	115900000	chr7	116160000	116170000	ENSG00000135269.13	7.392e-12
chr7	115893845	rs17138483	A	C	chr7	115890000	115900000	chr7	116440000	116450000	ENSG00000135269.13	7.392e-12
chr7	115893845	rs17138483	A	C	chr7	115895000	115900000	chr7	116225000	116230000	ENSG00000135269.13	7.392e-12
chr7	115893845	rs17138483	A	C	chr7	115895000	115900000	chr7	116445000	116450000	ENSG00000135269.13	7.392e-12
chr7	115893845	rs17138483	A	C	chr7	115895000	115900000	chr7	116450000	116455000	ENSG00000135269.13	7.392e-12
chr7	115894403	rs17138486	C	G	chr7	115890000	115900000	chr7	116160000	116170000	ENSG00000135269.13	7.392e-12
chr7	115894403	rs17138486	C	G	chr7	115890000	115900000	chr7	116440000	116450000	ENSG00000135269.13	7.392e-12
chr7	115894403	rs17138486	C	G	chr7	115895000	115900000	chr7	116225000	116230000	ENSG00000135269.13	7.392e-12
chr7	115894403	rs17138486	C	G	chr7	115895000	115900000	chr7	116445000	116450000	ENSG00000135269.13	7.392e-12
chr7	115894403	rs17138486	C	G	chr7	115895000	115900000	chr7	116450000	116455000	ENSG00000135269.13	7.392e-12
chr7	115894589	rs112016811	A	T	chr7	115890000	115900000	chr7	116160000	116170000	ENSG00000135269.13	1.39824e-11
chr7	115894589	rs112016811	A	T	chr7	115890000	115900000	chr7	116440000	116450000	ENSG00000135269.13	1.39824e-11
chr7	115894589	rs112016811	A	T	chr7	115895000	115900000	chr7	116225000	116230000	ENSG00000135269.13	1.39824e-11
chr7	115894589	rs112016811	A	T	chr7	115895000	115900000	chr7	116445000	116450000	ENSG00000135269.13	1.39824e-11
chr7	115894589	rs112016811	A	T	chr7	115895000	115900000	chr7	116450000	116455000	ENSG00000135269.13	1.39824e-11
chr7	115895010	rs4730719	G	T	chr7	115890000	115900000	chr7	116160000	116170000	ENSG00000135269.13	1.1616e-11
chr7	115895010	rs4730719	G	T	chr7	115890000	115900000	chr7	116440000	116450000	ENSG00000135269.13	1.1616e-11
chr7	115895010	rs4730719	G	T	chr7	115895000	115900000	chr7	116225000	116230000	ENSG00000135269.13	1.1616e-11
chr7	115895010	rs4730719	G	T	chr7	115895000	115900000	chr7	116445000	116450000	ENSG00000135269.13	1.1616e-11
chr7	115895010	rs4730719	G	T	chr7	115895000	115900000	chr7	116450000	116455000	ENSG00000135269.13	1.1616e-11
chr7	115895235	rs4730720	T	C	chr7	115890000	115900000	chr7	116160000	116170000	ENSG00000135269.13	7.392e-12
chr7	115895235	rs4730720	T	C	chr7	115890000	115900000	chr7	116440000	116450000	ENSG00000135269.13	7.392e-12
chr7	115895235	rs4730720	T	C	chr7	115895000	115900000	chr7	116225000	116230000	ENSG00000135269.13	7.392e-12
chr7	115895235	rs4730720	T	C	chr7	115895000	115900000	chr7	116445000	116450000	ENSG00000135269.13	7.392e-12
chr7	115895235	rs4730720	T	C	chr7	115895000	115900000	chr7	116450000	116455000	ENSG00000135269.13	7.392e-12
chr7	115895433	rs6948556	T	C	chr7	115890000	115900000	chr7	116160000	116170000	ENSG00000135269.13	7.392e-12
chr7	115895433	rs6948556	T	C	chr7	115890000	115900000	chr7	116440000	116450000	ENSG00000135269.13	7.392e-12
chr7	115895433	rs6948556	T	C	chr7	115895000	115900000	chr7	116225000	116230000	ENSG00000135269.13	7.392e-12
chr7	115895433	rs6948556	T	C	chr7	115895000	115900000	chr7	116445000	116450000	ENSG00000135269.13	7.392e-12
chr7	115895433	rs6948556	T	C	chr7	115895000	115900000	chr7	116450000	116455000	ENSG00000135269.13	7.392e-12
chr7	115895718	rs6966770	A	G	chr7	115890000	115900000	chr7	116160000	116170000	ENSG00000135269.13	7.392e-12
chr7	115895718	rs6966770	A	G	chr7	115890000	115900000	chr7	116440000	116450000	ENSG00000135269.13	7.392e-12
chr7	115895718	rs6966770	A	G	chr7	115895000	115900000	chr7	116225000	116230000	ENSG00000135269.13	7.392e-12
chr7	115895718	rs6966770	A	G	chr7	115895000	115900000	chr7	116445000	116450000	ENSG00000135269.13	7.392e-12
chr7	115895718	rs6966770	A	G	chr7	115895000	115900000	chr7	116450000	116455000	ENSG00000135269.13	7.392e-12
chr7	115896049	rs6967695	G	A	chr7	115890000	115900000	chr7	116160000	116170000	ENSG00000135269.13	7.392e-12
chr7	115896049	rs6967695	G	A	chr7	115890000	115900000	chr7	116440000	116450000	ENSG00000135269.13	7.392e-12
chr7	115896049	rs6967695	G	A	chr7	115895000	115900000	chr7	116225000	116230000	ENSG00000135269.13	7.392e-12
chr7	115896049	rs6967695	G	A	chr7	115895000	115900000	chr7	116445000	116450000	ENSG00000135269.13	7.392e-12
chr7	115896049	rs6967695	G	A	chr7	115895000	115900000	chr7	116450000	116455000	ENSG00000135269.13	7.392e-12
chr7	115896716	rs3807981	G	A	chr7	115890000	115900000	chr7	116160000	116170000	ENSG00000135269.13	9.82858e-12
chr7	115896716	rs3807981	G	A	chr7	115890000	115900000	chr7	116440000	116450000	ENSG00000135269.13	9.82858e-12
chr7	115896716	rs3807981	G	A	chr7	115895000	115900000	chr7	116225000	116230000	ENSG00000135269.13	9.82858e-12
chr7	115896716	rs3807981	G	A	chr7	115895000	115900000	chr7	116445000	116450000	ENSG00000135269.13	9.82858e-12
chr7	115896716	rs3807981	G	A	chr7	115895000	115900000	chr7	116450000	116455000	ENSG00000135269.13	9.82858e-12
chr7	115897096	rs2402057	T	C	chr7	115890000	115900000	chr7	116160000	116170000	ENSG00000135269.13	4.88022e-12
chr7	115897096	rs2402057	T	C	chr7	115890000	115900000	chr7	116440000	116450000	ENSG00000135269.13	4.88022e-12
chr7	115897096	rs2402057	T	C	chr7	115895000	115900000	chr7	116225000	116230000	ENSG00000135269.13	4.88022e-12
chr7	115897096	rs2402057	T	C	chr7	115895000	115900000	chr7	116445000	116450000	ENSG00000135269.13	4.88022e-12
chr7	115897096	rs2402057	T	C	chr7	115895000	115900000	chr7	116450000	116455000	ENSG00000135269.13	4.88022e-12
chr7	115897871	rs2896180	A	G	chr7	115890000	115900000	chr7	116160000	116170000	ENSG00000135269.13	6.32055e-12
chr7	115897871	rs2896180	A	G	chr7	115890000	115900000	chr7	116440000	116450000	ENSG00000135269.13	6.32055e-12
chr7	115897871	rs2896180	A	G	chr7	115895000	115900000	chr7	116225000	116230000	ENSG00000135269.13	6.32055e-12
chr7	115897871	rs2896180	A	G	chr7	115895000	115900000	chr7	116445000	116450000	ENSG00000135269.13	6.32055e-12
chr7	115897871	rs2896180	A	G	chr7	115895000	115900000	chr7	116450000	116455000	ENSG00000135269.13	6.32055e-12
chr7	115897884	rs2896181	C	T	chr7	115890000	115900000	chr7	116160000	116170000	ENSG00000135269.13	6.32055e-12
chr7	115897884	rs2896181	C	T	chr7	115890000	115900000	chr7	116440000	116450000	ENSG00000135269.13	6.32055e-12
chr7	115897884	rs2896181	C	T	chr7	115895000	115900000	chr7	116225000	116230000	ENSG00000135269.13	6.32055e-12
chr7	115897884	rs2896181	C	T	chr7	115895000	115900000	chr7	116445000	116450000	ENSG00000135269.13	6.32055e-12
chr7	115897884	rs2896181	C	T	chr7	115895000	115900000	chr7	116450000	116455000	ENSG00000135269.13	6.32055e-12
chr7	115898177	rs3173919	G	C	chr7	115890000	115900000	chr7	116160000	116170000	ENSG00000135269.13	4.70774e-12
chr7	115898177	rs3173919	G	C	chr7	115890000	115900000	chr7	116440000	116450000	ENSG00000135269.13	4.70774e-12
chr7	115898177	rs3173919	G	C	chr7	115895000	115900000	chr7	116225000	116230000	ENSG00000135269.13	4.70774e-12
chr7	115898177	rs3173919	G	C	chr7	115895000	115900000	chr7	116445000	116450000	ENSG00000135269.13	4.70774e-12
chr7	115898177	rs3173919	G	C	chr7	115895000	115900000	chr7	116450000	116455000	ENSG00000135269.13	4.70774e-12
chr7	115898442	rs1141470	G	C	chr7	115890000	115900000	chr7	116160000	116170000	ENSG00000135269.13	7.6994e-12
chr7	115898442	rs1141470	G	C	chr7	115890000	115900000	chr7	116440000	116450000	ENSG00000135269.13	7.6994e-12
chr7	115898442	rs1141470	G	C	chr7	115895000	115900000	chr7	116225000	116230000	ENSG00000135269.13	7.6994e-12
chr7	115898442	rs1141470	G	C	chr7	115895000	115900000	chr7	116445000	116450000	ENSG00000135269.13	7.6994e-12
chr7	115898442	rs1141470	G	C	chr7	115895000	115900000	chr7	116450000	116455000	ENSG00000135269.13	7.6994e-12
chr7	115898885	rs3807982	T	C	chr7	115890000	115900000	chr7	116160000	116170000	ENSG00000135269.13	7.392e-12
chr7	115898885	rs3807982	T	C	chr7	115890000	115900000	chr7	116440000	116450000	ENSG00000135269.13	7.392e-12
chr7	115898885	rs3807982	T	C	chr7	115895000	115900000	chr7	116225000	116230000	ENSG00000135269.13	7.392e-12
chr7	115898885	rs3807982	T	C	chr7	115895000	115900000	chr7	116445000	116450000	ENSG00000135269.13	7.392e-12
chr7	115898885	rs3807982	T	C	chr7	115895000	115900000	chr7	116450000	116455000	ENSG00000135269.13	7.392e-12
chr7	115898991	rs3807983	T	C	chr7	115890000	115900000	chr7	116160000	116170000	ENSG00000135269.13	7.6994e-12
chr7	115898991	rs3807983	T	C	chr7	115890000	115900000	chr7	116440000	116450000	ENSG00000135269.13	7.6994e-12
chr7	115898991	rs3807983	T	C	chr7	115895000	115900000	chr7	116225000	116230000	ENSG00000135269.13	7.6994e-12
chr7	115898991	rs3807983	T	C	chr7	115895000	115900000	chr7	116445000	116450000	ENSG00000135269.13	7.6994e-12
chr7	115898991	rs3807983	T	C	chr7	115895000	115900000	chr7	116450000	116455000	ENSG00000135269.13	7.6994e-12
chr7	115900394	rs10500059	C	T	chr7	115890000	115900000	chr7	116160000	116170000	ENSG00000135269.13	1.53975e-11
chr7	115900394	rs10500059	C	T	chr7	115890000	115900000	chr7	116440000	116450000	ENSG00000135269.13	1.53975e-11
chr7	115900394	rs10500059	C	T	chr7	115895000	115900000	chr7	116225000	116230000	ENSG00000135269.13	1.53975e-11
chr7	115900394	rs10500059	C	T	chr7	115895000	115900000	chr7	116445000	116450000	ENSG00000135269.13	1.53975e-11
chr7	115900394	rs10500059	C	T	chr7	115895000	115900000	chr7	116450000	116455000	ENSG00000135269.13	1.53975e-11
chr7	115900686	rs10500060	C	T	chr7	115890000	115900000	chr7	116160000	116170000	ENSG00000135269.13	2.41897e-11
chr7	115900686	rs10500060	C	T	chr7	115890000	115900000	chr7	116440000	116450000	ENSG00000135269.13	2.41897e-11
chr7	115900686	rs10500060	C	T	chr7	115895000	115900000	chr7	116225000	116230000	ENSG00000135269.13	2.41897e-11
chr7	115900686	rs10500060	C	T	chr7	115895000	115900000	chr7	116445000	116450000	ENSG00000135269.13	2.41897e-11
chr7	115900686	rs10500060	C	T	chr7	115895000	115900000	chr7	116450000	116455000	ENSG00000135269.13	2.41897e-11
chr7	115904052	rs4730723	T	C	chr7	115890000	115900000	chr7	116160000	116170000	ENSG00000135269.13	2.45646e-09
chr7	115904052	rs4730723	T	C	chr7	115890000	115900000	chr7	116440000	116450000	ENSG00000135269.13	2.45646e-09
chr7	115904052	rs4730723	T	C	chr7	115895000	115900000	chr7	116225000	116230000	ENSG00000135269.13	2.45646e-09
chr7	115904052	rs4730723	T	C	chr7	115895000	115900000	chr7	116445000	116450000	ENSG00000135269.13	2.45646e-09
chr7	115904052	rs4730723	T	C	chr7	115895000	115900000	chr7	116450000	116455000	ENSG00000135269.13	2.45646e-09
chr13	44397815	rs9533634	T	C	chr13	44375000	44400000	chr13	43150000	43175000	ENSG00000179630.6	7.86433e-07
chr13	44397815	rs9533634	T	C	chr13	44375000	44400000	chr13	43525000	43550000	ENSG00000179630.6	7.86433e-07
chr13	44397815	rs9533634	T	C	chr13	44375000	44400000	chr13	43650000	43675000	ENSG00000179630.6	7.86433e-07
chr13	44457925	rs3764147	A	G	chr13	44450000	44460000	chr13	43560000	43570000	ENSG00000179630.6	1.00834e-06
Artery_Aorta
chr7	115860783	rs1004107	A	T	chr7	115865000	115870000	chr7	115830000	115835000	ENSG00000135269.13	1.0566e-06
chr7	115861660	rs9969224	T	C	chr7	115865000	115870000	chr7	115830000	115835000	ENSG00000135269.13	1.0566e-06
chr7	115862296	rs1004109	A	T	chr7	115865000	115870000	chr7	115830000	115835000	ENSG00000135269.13	1.0566e-06
chr7	115862902	rs1000966	A	G	chr7	115865000	115870000	chr7	115830000	115835000	ENSG00000135269.13	1.15029e-06
chr7	115863446	rs3807968	G	A	chr7	115865000	115870000	chr7	115830000	115835000	ENSG00000135269.13	1.0566e-06
chr7	115864889	rs3779509	C	A	chr7	115865000	115870000	chr7	115830000	115835000	ENSG00000135269.13	1.0566e-06
chr7	115866354	rs1881287	A	G	chr7	115870000	115880000	chr7	115810000	115820000	ENSG00000135269.13	1.0566e-06
chr7	115866354	rs1881287	A	G	chr7	115865000	115870000	chr7	115830000	115835000	ENSG00000135269.13	1.0566e-06
chr7	115868798	rs58624059	T	C	chr7	115870000	115880000	chr7	115810000	115820000	ENSG00000135269.13	3.21239e-06
chr7	115868798	rs58624059	T	C	chr7	115865000	115870000	chr7	115830000	115835000	ENSG00000135269.13	3.21239e-06
chr7	115874466	rs12670683	T	C	chr7	115870000	115880000	chr7	115810000	115820000	ENSG00000135269.13	8.83435e-07
chr7	115874466	rs12670683	T	C	chr7	115875000	115880000	chr7	115815000	115820000	ENSG00000135269.13	8.83435e-07
chr7	115874466	rs12670683	T	C	chr7	115865000	115870000	chr7	115830000	115835000	ENSG00000135269.13	8.83435e-07
chr7	115874560	rs2030978	C	T	chr7	115870000	115880000	chr7	115810000	115820000	ENSG00000135269.13	1.0566e-06
chr7	115874560	rs2030978	C	T	chr7	115875000	115880000	chr7	115815000	115820000	ENSG00000135269.13	1.0566e-06
chr7	115874560	rs2030978	C	T	chr7	115865000	115870000	chr7	115830000	115835000	ENSG00000135269.13	1.0566e-06
chr7	115875359	rs2030977	G	C	chr7	115870000	115880000	chr7	115810000	115820000	ENSG00000135269.13	7.57191e-07
chr7	115875359	rs2030977	G	C	chr7	115875000	115880000	chr7	115815000	115820000	ENSG00000135269.13	7.57191e-07
chr7	115876365	rs6959237	C	T	chr7	115870000	115880000	chr7	115810000	115820000	ENSG00000135269.13	4.58487e-07
chr7	115876365	rs6959237	C	T	chr7	115875000	115880000	chr7	115815000	115820000	ENSG00000135269.13	4.58487e-07
chr7	115880277	rs3807975	G	A	chr7	115870000	115880000	chr7	115810000	115820000	ENSG00000135269.13	1.0566e-06
chr7	115880277	rs3807975	G	A	chr7	115875000	115880000	chr7	115815000	115820000	ENSG00000135269.13	1.0566e-06
chr7	115881159	rs66652906	G	A	chr7	115870000	115880000	chr7	115810000	115820000	ENSG00000135269.13	1.13617e-06
chr7	115881159	rs66652906	G	A	chr7	115875000	115880000	chr7	115815000	115820000	ENSG00000135269.13	1.13617e-06
chr7	115881458	rs58595078	A	G	chr7	115870000	115880000	chr7	115810000	115820000	ENSG00000135269.13	1.0566e-06
chr7	115881458	rs58595078	A	G	chr7	115875000	115880000	chr7	115815000	115820000	ENSG00000135269.13	1.0566e-06
chr7	115882323	rs3757730	G	A	chr7	115870000	115880000	chr7	115810000	115820000	ENSG00000135269.13	1.0566e-06
chr7	115882323	rs3757730	G	A	chr7	115875000	115880000	chr7	115815000	115820000	ENSG00000135269.13	1.0566e-06
chr7	115883453	rs57321537	T	G	chr7	115870000	115880000	chr7	115810000	115820000	ENSG00000135269.13	1.0566e-06
chr7	115883453	rs57321537	T	G	chr7	115875000	115880000	chr7	115815000	115820000	ENSG00000135269.13	1.0566e-06
chr7	115884319	rs138623810	C	A	chr7	115870000	115880000	chr7	115810000	115820000	ENSG00000135269.13	1.29254e-06
chr7	115884319	rs138623810	C	A	chr7	115875000	115880000	chr7	115815000	115820000	ENSG00000135269.13	1.29254e-06
chr7	115886079	rs7811984	A	G	chr7	115890000	115900000	chr7	116160000	116170000	ENSG00000135269.13	1.0566e-06
chr7	115886079	rs7811984	A	G	chr7	115890000	115900000	chr7	116440000	116450000	ENSG00000135269.13	1.0566e-06
chr7	115888162	rs6953050	A	G	chr7	115890000	115900000	chr7	116160000	116170000	ENSG00000135269.13	9.97328e-07
chr7	115888162	rs6953050	A	G	chr7	115890000	115900000	chr7	116440000	116450000	ENSG00000135269.13	9.97328e-07
chr7	115888339	rs6957561	G	A	chr7	115890000	115900000	chr7	116160000	116170000	ENSG00000135269.13	6.67267e-07
chr7	115888339	rs6957561	G	A	chr7	115890000	115900000	chr7	116440000	116450000	ENSG00000135269.13	6.67267e-07
chr7	115892650	rs1048508	T	G	chr7	115890000	115900000	chr7	116160000	116170000	ENSG00000135269.13	3.10114e-07
chr7	115892650	rs1048508	T	G	chr7	115890000	115900000	chr7	116440000	116450000	ENSG00000135269.13	3.10114e-07
chr7	115892650	rs1048508	T	G	chr7	115895000	115900000	chr7	116225000	116230000	ENSG00000135269.13	3.10114e-07
chr7	115892650	rs1048508	T	G	chr7	115895000	115900000	chr7	116445000	116450000	ENSG00000135269.13	3.10114e-07
chr7	115892650	rs1048508	T	G	chr7	115895000	115900000	chr7	116450000	116455000	ENSG00000135269.13	3.10114e-07
chr7	115892738	rs17138472	A	G	chr7	115890000	115900000	chr7	116160000	116170000	ENSG00000135269.13	3.10114e-07
chr7	115892738	rs17138472	A	G	chr7	115890000	115900000	chr7	116440000	116450000	ENSG00000135269.13	3.10114e-07
chr7	115892738	rs17138472	A	G	chr7	115895000	115900000	chr7	116225000	116230000	ENSG00000135269.13	3.10114e-07
chr7	115892738	rs17138472	A	G	chr7	115895000	115900000	chr7	116445000	116450000	ENSG00000135269.13	3.10114e-07
chr7	115892738	rs17138472	A	G	chr7	115895000	115900000	chr7	116450000	116455000	ENSG00000135269.13	3.10114e-07
chr7	115893407	rs3823977	A	T	chr7	115890000	115900000	chr7	116160000	116170000	ENSG00000135269.13	1.36942e-06
chr7	115893407	rs3823977	A	T	chr7	115890000	115900000	chr7	116440000	116450000	ENSG00000135269.13	1.36942e-06
chr7	115893407	rs3823977	A	T	chr7	115895000	115900000	chr7	116225000	116230000	ENSG00000135269.13	1.36942e-06
chr7	115893407	rs3823977	A	T	chr7	115895000	115900000	chr7	116445000	116450000	ENSG00000135269.13	1.36942e-06
chr7	115893407	rs3823977	A	T	chr7	115895000	115900000	chr7	116450000	116455000	ENSG00000135269.13	1.36942e-06
chr7	115893647	rs3807980	A	G	chr7	115890000	115900000	chr7	116160000	116170000	ENSG00000135269.13	3.10114e-07
chr7	115893647	rs3807980	A	G	chr7	115890000	115900000	chr7	116440000	116450000	ENSG00000135269.13	3.10114e-07
chr7	115893647	rs3807980	A	G	chr7	115895000	115900000	chr7	116225000	116230000	ENSG00000135269.13	3.10114e-07
chr7	115893647	rs3807980	A	G	chr7	115895000	115900000	chr7	116445000	116450000	ENSG00000135269.13	3.10114e-07
chr7	115893647	rs3807980	A	G	chr7	115895000	115900000	chr7	116450000	116455000	ENSG00000135269.13	3.10114e-07
chr7	115893845	rs17138483	A	C	chr7	115890000	115900000	chr7	116160000	116170000	ENSG00000135269.13	9.39615e-07
chr7	115893845	rs17138483	A	C	chr7	115890000	115900000	chr7	116440000	116450000	ENSG00000135269.13	9.39615e-07
chr7	115893845	rs17138483	A	C	chr7	115895000	115900000	chr7	116225000	116230000	ENSG00000135269.13	9.39615e-07
chr7	115893845	rs17138483	A	C	chr7	115895000	115900000	chr7	116445000	116450000	ENSG00000135269.13	9.39615e-07
chr7	115893845	rs17138483	A	C	chr7	115895000	115900000	chr7	116450000	116455000	ENSG00000135269.13	9.39615e-07
chr7	115894403	rs17138486	C	G	chr7	115890000	115900000	chr7	116160000	116170000	ENSG00000135269.13	9.39615e-07
chr7	115894403	rs17138486	C	G	chr7	115890000	115900000	chr7	116440000	116450000	ENSG00000135269.13	9.39615e-07
chr7	115894403	rs17138486	C	G	chr7	115895000	115900000	chr7	116225000	116230000	ENSG00000135269.13	9.39615e-07
chr7	115894403	rs17138486	C	G	chr7	115895000	115900000	chr7	116445000	116450000	ENSG00000135269.13	9.39615e-07
chr7	115894403	rs17138486	C	G	chr7	115895000	115900000	chr7	116450000	116455000	ENSG00000135269.13	9.39615e-07
chr7	115894589	rs112016811	A	T	chr7	115890000	115900000	chr7	116160000	116170000	ENSG00000135269.13	2.3317e-06
chr7	115894589	rs112016811	A	T	chr7	115890000	115900000	chr7	116440000	116450000	ENSG00000135269.13	2.3317e-06
chr7	115894589	rs112016811	A	T	chr7	115895000	115900000	chr7	116225000	116230000	ENSG00000135269.13	2.3317e-06
chr7	115894589	rs112016811	A	T	chr7	115895000	115900000	chr7	116445000	116450000	ENSG00000135269.13	2.3317e-06
chr7	115894589	rs112016811	A	T	chr7	115895000	115900000	chr7	116450000	116455000	ENSG00000135269.13	2.3317e-06
chr7	115895010	rs4730719	G	T	chr7	115890000	115900000	chr7	116160000	116170000	ENSG00000135269.13	9.39615e-07
chr7	115895010	rs4730719	G	T	chr7	115890000	115900000	chr7	116440000	116450000	ENSG00000135269.13	9.39615e-07
chr7	115895010	rs4730719	G	T	chr7	115895000	115900000	chr7	116225000	116230000	ENSG00000135269.13	9.39615e-07
chr7	115895010	rs4730719	G	T	chr7	115895000	115900000	chr7	116445000	116450000	ENSG00000135269.13	9.39615e-07
chr7	115895010	rs4730719	G	T	chr7	115895000	115900000	chr7	116450000	116455000	ENSG00000135269.13	9.39615e-07
chr7	115895235	rs4730720	T	C	chr7	115890000	115900000	chr7	116160000	116170000	ENSG00000135269.13	9.39615e-07
chr7	115895235	rs4730720	T	C	chr7	115890000	115900000	chr7	116440000	116450000	ENSG00000135269.13	9.39615e-07
chr7	115895235	rs4730720	T	C	chr7	115895000	115900000	chr7	116225000	116230000	ENSG00000135269.13	9.39615e-07
chr7	115895235	rs4730720	T	C	chr7	115895000	115900000	chr7	116445000	116450000	ENSG00000135269.13	9.39615e-07
chr7	115895235	rs4730720	T	C	chr7	115895000	115900000	chr7	116450000	116455000	ENSG00000135269.13	9.39615e-07
chr7	115895433	rs6948556	T	C	chr7	115890000	115900000	chr7	116160000	116170000	ENSG00000135269.13	7.73343e-07
chr7	115895433	rs6948556	T	C	chr7	115890000	115900000	chr7	116440000	116450000	ENSG00000135269.13	7.73343e-07
chr7	115895433	rs6948556	T	C	chr7	115895000	115900000	chr7	116225000	116230000	ENSG00000135269.13	7.73343e-07
chr7	115895433	rs6948556	T	C	chr7	115895000	115900000	chr7	116445000	116450000	ENSG00000135269.13	7.73343e-07
chr7	115895433	rs6948556	T	C	chr7	115895000	115900000	chr7	116450000	116455000	ENSG00000135269.13	7.73343e-07
chr7	115895718	rs6966770	A	G	chr7	115890000	115900000	chr7	116160000	116170000	ENSG00000135269.13	9.39615e-07
chr7	115895718	rs6966770	A	G	chr7	115890000	115900000	chr7	116440000	116450000	ENSG00000135269.13	9.39615e-07
chr7	115895718	rs6966770	A	G	chr7	115895000	115900000	chr7	116225000	116230000	ENSG00000135269.13	9.39615e-07
chr7	115895718	rs6966770	A	G	chr7	115895000	115900000	chr7	116445000	116450000	ENSG00000135269.13	9.39615e-07
chr7	115895718	rs6966770	A	G	chr7	115895000	115900000	chr7	116450000	116455000	ENSG00000135269.13	9.39615e-07
chr7	115896049	rs6967695	G	A	chr7	115890000	115900000	chr7	116160000	116170000	ENSG00000135269.13	9.39615e-07
chr7	115896049	rs6967695	G	A	chr7	115890000	115900000	chr7	116440000	116450000	ENSG00000135269.13	9.39615e-07
chr7	115896049	rs6967695	G	A	chr7	115895000	115900000	chr7	116225000	116230000	ENSG00000135269.13	9.39615e-07
chr7	115896049	rs6967695	G	A	chr7	115895000	115900000	chr7	116445000	116450000	ENSG00000135269.13	9.39615e-07
chr7	115896049	rs6967695	G	A	chr7	115895000	115900000	chr7	116450000	116455000	ENSG00000135269.13	9.39615e-07
chr7	115896716	rs3807981	G	A	chr7	115890000	115900000	chr7	116160000	116170000	ENSG00000135269.13	9.39615e-07
chr7	115896716	rs3807981	G	A	chr7	115890000	115900000	chr7	116440000	116450000	ENSG00000135269.13	9.39615e-07
chr7	115896716	rs3807981	G	A	chr7	115895000	115900000	chr7	116225000	116230000	ENSG00000135269.13	9.39615e-07
chr7	115896716	rs3807981	G	A	chr7	115895000	115900000	chr7	116445000	116450000	ENSG00000135269.13	9.39615e-07
chr7	115896716	rs3807981	G	A	chr7	115895000	115900000	chr7	116450000	116455000	ENSG00000135269.13	9.39615e-07
chr7	115897096	rs2402057	T	C	chr7	115890000	115900000	chr7	116160000	116170000	ENSG00000135269.13	7.57333e-07
chr7	115897096	rs2402057	T	C	chr7	115890000	115900000	chr7	116440000	116450000	ENSG00000135269.13	7.57333e-07
chr7	115897096	rs2402057	T	C	chr7	115895000	115900000	chr7	116225000	116230000	ENSG00000135269.13	7.57333e-07
chr7	115897096	rs2402057	T	C	chr7	115895000	115900000	chr7	116445000	116450000	ENSG00000135269.13	7.57333e-07
chr7	115897096	rs2402057	T	C	chr7	115895000	115900000	chr7	116450000	116455000	ENSG00000135269.13	7.57333e-07
chr7	115897222	rs2402058	A	G	chr7	115890000	115900000	chr7	116160000	116170000	ENSG00000135269.13	2.86135e-05
chr7	115897222	rs2402058	A	G	chr7	115890000	115900000	chr7	116440000	116450000	ENSG00000135269.13	2.86135e-05
chr7	115897222	rs2402058	A	G	chr7	115895000	115900000	chr7	116225000	116230000	ENSG00000135269.13	2.86135e-05
chr7	115897222	rs2402058	A	G	chr7	115895000	115900000	chr7	116445000	116450000	ENSG00000135269.13	2.86135e-05
chr7	115897222	rs2402058	A	G	chr7	115895000	115900000	chr7	116450000	116455000	ENSG00000135269.13	2.86135e-05
chr7	115897242	rs2402059	T	G	chr7	115890000	115900000	chr7	116160000	116170000	ENSG00000135269.13	2.86135e-05
chr7	115897242	rs2402059	T	G	chr7	115890000	115900000	chr7	116440000	116450000	ENSG00000135269.13	2.86135e-05
chr7	115897242	rs2402059	T	G	chr7	115895000	115900000	chr7	116225000	116230000	ENSG00000135269.13	2.86135e-05
chr7	115897242	rs2402059	T	G	chr7	115895000	115900000	chr7	116445000	116450000	ENSG00000135269.13	2.86135e-05
chr7	115897242	rs2402059	T	G	chr7	115895000	115900000	chr7	116450000	116455000	ENSG00000135269.13	2.86135e-05
chr7	115897871	rs2896180	A	G	chr7	115890000	115900000	chr7	116160000	116170000	ENSG00000135269.13	1.14766e-06
chr7	115897871	rs2896180	A	G	chr7	115890000	115900000	chr7	116440000	116450000	ENSG00000135269.13	1.14766e-06
chr7	115897871	rs2896180	A	G	chr7	115895000	115900000	chr7	116225000	116230000	ENSG00000135269.13	1.14766e-06
chr7	115897871	rs2896180	A	G	chr7	115895000	115900000	chr7	116445000	116450000	ENSG00000135269.13	1.14766e-06
chr7	115897871	rs2896180	A	G	chr7	115895000	115900000	chr7	116450000	116455000	ENSG00000135269.13	1.14766e-06
chr7	115897884	rs2896181	C	T	chr7	115890000	115900000	chr7	116160000	116170000	ENSG00000135269.13	1.14766e-06
chr7	115897884	rs2896181	C	T	chr7	115890000	115900000	chr7	116440000	116450000	ENSG00000135269.13	1.14766e-06
chr7	115897884	rs2896181	C	T	chr7	115895000	115900000	chr7	116225000	116230000	ENSG00000135269.13	1.14766e-06
chr7	115897884	rs2896181	C	T	chr7	115895000	115900000	chr7	116445000	116450000	ENSG00000135269.13	1.14766e-06
chr7	115897884	rs2896181	C	T	chr7	115895000	115900000	chr7	116450000	116455000	ENSG00000135269.13	1.14766e-06
chr7	115898177	rs3173919	G	C	chr7	115890000	115900000	chr7	116160000	116170000	ENSG00000135269.13	1.67119e-06
chr7	115898177	rs3173919	G	C	chr7	115890000	115900000	chr7	116440000	116450000	ENSG00000135269.13	1.67119e-06
chr7	115898177	rs3173919	G	C	chr7	115895000	115900000	chr7	116225000	116230000	ENSG00000135269.13	1.67119e-06
chr7	115898177	rs3173919	G	C	chr7	115895000	115900000	chr7	116445000	116450000	ENSG00000135269.13	1.67119e-06
chr7	115898177	rs3173919	G	C	chr7	115895000	115900000	chr7	116450000	116455000	ENSG00000135269.13	1.67119e-06
chr7	115898442	rs1141470	G	C	chr7	115890000	115900000	chr7	116160000	116170000	ENSG00000135269.13	9.39615e-07
chr7	115898442	rs1141470	G	C	chr7	115890000	115900000	chr7	116440000	116450000	ENSG00000135269.13	9.39615e-07
chr7	115898442	rs1141470	G	C	chr7	115895000	115900000	chr7	116225000	116230000	ENSG00000135269.13	9.39615e-07
chr7	115898442	rs1141470	G	C	chr7	115895000	115900000	chr7	116445000	116450000	ENSG00000135269.13	9.39615e-07
chr7	115898442	rs1141470	G	C	chr7	115895000	115900000	chr7	116450000	116455000	ENSG00000135269.13	9.39615e-07
chr7	115898885	rs3807982	T	C	chr7	115890000	115900000	chr7	116160000	116170000	ENSG00000135269.13	9.39615e-07
chr7	115898885	rs3807982	T	C	chr7	115890000	115900000	chr7	116440000	116450000	ENSG00000135269.13	9.39615e-07
chr7	115898885	rs3807982	T	C	chr7	115895000	115900000	chr7	116225000	116230000	ENSG00000135269.13	9.39615e-07
chr7	115898885	rs3807982	T	C	chr7	115895000	115900000	chr7	116445000	116450000	ENSG00000135269.13	9.39615e-07
chr7	115898885	rs3807982	T	C	chr7	115895000	115900000	chr7	116450000	116455000	ENSG00000135269.13	9.39615e-07
chr7	115898991	rs3807983	T	C	chr7	115890000	115900000	chr7	116160000	116170000	ENSG00000135269.13	1.01298e-06
chr7	115898991	rs3807983	T	C	chr7	115890000	115900000	chr7	116440000	116450000	ENSG00000135269.13	1.01298e-06
chr7	115898991	rs3807983	T	C	chr7	115895000	115900000	chr7	116225000	116230000	ENSG00000135269.13	1.01298e-06
chr7	115898991	rs3807983	T	C	chr7	115895000	115900000	chr7	116445000	116450000	ENSG00000135269.13	1.01298e-06
chr7	115898991	rs3807983	T	C	chr7	115895000	115900000	chr7	116450000	116455000	ENSG00000135269.13	1.01298e-06
chr7	115899335	rs4730721	T	A	chr7	115890000	115900000	chr7	116160000	116170000	ENSG00000135269.13	4.39622e-05
chr7	115899335	rs4730721	T	A	chr7	115890000	115900000	chr7	116440000	116450000	ENSG00000135269.13	4.39622e-05
chr7	115899335	rs4730721	T	A	chr7	115895000	115900000	chr7	116225000	116230000	ENSG00000135269.13	4.39622e-05
chr7	115899335	rs4730721	T	A	chr7	115895000	115900000	chr7	116445000	116450000	ENSG00000135269.13	4.39622e-05
chr7	115899335	rs4730721	T	A	chr7	115895000	115900000	chr7	116450000	116455000	ENSG00000135269.13	4.39622e-05
chr7	115900394	rs10500059	C	T	chr7	115890000	115900000	chr7	116160000	116170000	ENSG00000135269.13	1.98493e-06
chr7	115900394	rs10500059	C	T	chr7	115890000	115900000	chr7	116440000	116450000	ENSG00000135269.13	1.98493e-06
chr7	115900394	rs10500059	C	T	chr7	115895000	115900000	chr7	116225000	116230000	ENSG00000135269.13	1.98493e-06
chr7	115900394	rs10500059	C	T	chr7	115895000	115900000	chr7	116445000	116450000	ENSG00000135269.13	1.98493e-06
chr7	115900394	rs10500059	C	T	chr7	115895000	115900000	chr7	116450000	116455000	ENSG00000135269.13	1.98493e-06
chr7	115900686	rs10500060	C	T	chr7	115890000	115900000	chr7	116160000	116170000	ENSG00000135269.13	1.98493e-06
chr7	115900686	rs10500060	C	T	chr7	115890000	115900000	chr7	116440000	116450000	ENSG00000135269.13	1.98493e-06
chr7	115900686	rs10500060	C	T	chr7	115895000	115900000	chr7	116225000	116230000	ENSG00000135269.13	1.98493e-06
chr7	115900686	rs10500060	C	T	chr7	115895000	115900000	chr7	116445000	116450000	ENSG00000135269.13	1.98493e-06
chr7	115900686	rs10500060	C	T	chr7	115895000	115900000	chr7	116450000	116455000	ENSG00000135269.13	1.98493e-06
chr7	115904052	rs4730723	T	C	chr7	115890000	115900000	chr7	116160000	116170000	ENSG00000135269.13	1.05573e-05
chr7	115904052	rs4730723	T	C	chr7	115890000	115900000	chr7	116440000	116450000	ENSG00000135269.13	1.05573e-05
chr7	115904052	rs4730723	T	C	chr7	115895000	115900000	chr7	116225000	116230000	ENSG00000135269.13	1.05573e-05
chr7	115904052	rs4730723	T	C	chr7	115895000	115900000	chr7	116445000	116450000	ENSG00000135269.13	1.05573e-05
chr7	115904052	rs4730723	T	C	chr7	115895000	115900000	chr7	116450000	116455000	ENSG00000135269.13	1.05573e-05
chr10	14689835	rs10906729	C	T	chr10	14690000	14700000	chr10	14640000	14650000	ENSG00000065809.9	3.25027e-10
chr11	64129722	rs538147	G	A	chr11	64130000	64140000	chr11	64410000	64420000	ENSG00000173457.6	1.63131e-10
chr13	44397815	rs9533634	T	C	chr13	44375000	44400000	chr13	43150000	43175000	ENSG00000151773.8	8.22252e-07
chr13	44397815	rs9533634	T	C	chr13	44375000	44400000	chr13	43525000	43550000	ENSG00000151773.8	8.22252e-07
chr13	44397815	rs9533634	T	C	chr13	44375000	44400000	chr13	43650000	43675000	ENSG00000151773.8	8.22252e-07
chr13	44457925	rs3764147	A	G	chr13	44450000	44460000	chr13	43560000	43570000	ENSG00000151773.8	6.65359e-06
chr13	76446482	rs1323565	A	G	chr13	76450000	76455000	chr13	77045000	77050000	ENSG00000261105.1	4.74986e-06
chr13	76446482	rs1323565	A	G	chr13	76425000	76450000	chr13	76250000	76275000	ENSG00000261105.1	4.74986e-06
chr13	76446482	rs1323565	A	G	chr13	76440000	76450000	chr13	77050000	77060000	ENSG00000261105.1	4.74986e-06
chr13	76446482	rs1323565	A	G	chr13	76440000	76450000	chr13	77570000	77580000	ENSG00000261105.1	4.74986e-06
chr13	76446482	rs1323565	A	G	chr13	76445000	76450000	chr13	77475000	77480000	ENSG00000261105.1	4.74986e-06
chr13	76447196	rs9544058	T	C	chr13	76450000	76455000	chr13	77045000	77050000	ENSG00000261105.1	1.09051e-06
chr13	76447196	rs9544058	T	C	chr13	76425000	76450000	chr13	76250000	76275000	ENSG00000261105.1	1.09051e-06
chr13	76447196	rs9544058	T	C	chr13	76440000	76450000	chr13	77050000	77060000	ENSG00000261105.1	1.09051e-06
chr13	76447196	rs9544058	T	C	chr13	76440000	76450000	chr13	77570000	77580000	ENSG00000261105.1	1.09051e-06
chr13	76447196	rs9544058	T	C	chr13	76445000	76450000	chr13	77475000	77480000	ENSG00000261105.1	1.09051e-06
chr13	76451240	rs1323566	A	G	chr13	76450000	76455000	chr13	77045000	77050000	ENSG00000261105.1	1.11577e-06
chr13	76451240	rs1323566	A	G	chr13	76425000	76450000	chr13	76250000	76275000	ENSG00000261105.1	1.11577e-06
chr13	76451240	rs1323566	A	G	chr13	76440000	76450000	chr13	77050000	77060000	ENSG00000261105.1	1.11577e-06
chr13	76451240	rs1323566	A	G	chr13	76440000	76450000	chr13	77570000	77580000	ENSG00000261105.1	1.11577e-06
chr13	76451240	rs1323566	A	G	chr13	76445000	76450000	chr13	77475000	77480000	ENSG00000261105.1	1.11577e-06
chr16	56993324	rs3764261	C	A	chr16	56975000	57000000	chr16	57200000	57225000	ENSG00000087237.6	1.95759e-05
chr16	56993324	rs3764261	C	A	chr16	56990000	57000000	chr16	57200000	57210000	ENSG00000087237.6	1.95759e-05
chr16	56993324	rs3764261	C	A	chr16	56995000	57000000	chr16	57200000	57205000	ENSG00000087237.6	1.95759e-05
chr16	57452165	rs188872	A	G	chr16	57445000	57450000	chr16	57335000	57340000	ENSG00000088682.9	7.39454e-09
chr16	57452165	rs188872	A	G	chr16	57450000	57460000	chr16	57550000	57560000	ENSG00000088682.9	7.39454e-09
chr16	57452165	rs188872	A	G	chr16	57455000	57460000	chr16	57335000	57340000	ENSG00000088682.9	7.39454e-09
chr20	13786587	rs6079180	A	G	chr20	13790000	13800000	chr20	14030000	14040000	ENSG00000101247.13	4.64095e-15
chr10	98994454	rs2297987	A	G	chr10	98980000	98985000	chr10	98830000	98835000	ENSG00000052749.9	9.1089e-06
chr10	98994454	rs2297987	A	G	chr10	98990000	99000000	chr10	98830000	98840000	ENSG00000052749.9	9.1089e-06
chr10	98994454	rs2297987	A	G	chr10	98990000	98995000	chr10	98835000	98840000	ENSG00000052749.9	9.1089e-06
chr10	98998378	rs11189052	A	T	chr10	98990000	99000000	chr10	98830000	98840000	ENSG00000052749.9	2.86248e-06
chr10	98998378	rs11189052	A	T	chr10	98990000	98995000	chr10	98835000	98840000	ENSG00000052749.9	2.86248e-06
chr10	99003195	rs8181326	G	A	chr10	98990000	99000000	chr10	98830000	98840000	ENSG00000052749.9	2.75253e-05
chr10	99003195	rs8181326	G	A	chr10	98990000	98995000	chr10	98835000	98840000	ENSG00000052749.9	2.75253e-05
chr10	99006258	rs11189058	G	A	chr10	98990000	99000000	chr10	98830000	98840000	ENSG00000052749.9	2.87033e-06
Artery_CoroTry
chr12	40601940	rs11175593	C	T	chr12	40595000	40600000	chr12	40550000	40555000	ENSG00000188906.9	3.08517e-07
chr20	13786587	rs6079180	A	G	chr20	13790000	13800000	chr20	14030000	14040000	ENSG00000101247.13	4.54153e-09
Artery_Tibial
chr2	61772257	rs6545883	A	G	chr2	61760000	61770000	chr2	61880000	61890000	ENSG00000173209.18	2.3263e-05
chr2	232058493	rs2368563	A	G	chr2	232055000	232060000	chr2	231970000	231975000	ENSG00000135931.13	2.45781e-05
chr2	232058493	rs2368563	A	G	chr2	232060000	232065000	chr2	231970000	231975000	ENSG00000135931.13	2.45781e-05
chr2	232058493	rs2368563	A	G	chr2	232060000	232070000	chr2	231970000	231980000	ENSG00000135931.13	2.45781e-05
chr2	232060843	rs60664562	T	A	chr2	232055000	232060000	chr2	231970000	231975000	ENSG00000135931.13	4.67576e-06
chr2	232060843	rs60664562	T	A	chr2	232060000	232065000	chr2	231970000	231975000	ENSG00000135931.13	4.67576e-06
chr2	232060843	rs60664562	T	A	chr2	232060000	232070000	chr2	231970000	231980000	ENSG00000135931.13	4.67576e-06
[truncated: 2,764 more rows]

## Sheet: eQTL info with loop
Table6. eQTL information association with both significant SNP and HI-C loop
Thyroid	PLOD1	chr1	11967356	rs4846078	C	T	chr1	11960000	11970000	chr1	12020000	12030000	ENSG00000083444.12	4.9224e-05	PLOD1
	DYRK3	chr1	206897727	rs6540574	G	A	chr1	206890000	206900000	chr1	206800000	206810000	ENSG00000143479.11	1.0945e-06	DYRK3
Heart_Left_Ventricle	NSL1	chr1	212873431	rs2221593	C	T	chr1	212870000	212880000	chr1	212950000	212960000	ENSG00000117697.10	8.57217e-06	NSL1
Stomach	SLC35D1	chr1	67597119	rs3762318	G	A	chr1	67600000	67610000	chr1	67460000	67470000	ENSG00000116704.6	7.89971e-07	SLC35D1
Muscle_Skeletal_eQTL	PSMD1	chr2	232058493	rs2368563	A	G	chr2	232055000	232060000	chr2	231970000	231975000	ENSG00000173692.8	1.52166e-05	PSMD1
		chr2	232060843	rs60664562	T	A	chr2	232055000	232060000	chr2	231970000	231975000	ENSG00000173692.8	1.18389e-05	PSMD1
		chr2	232061520	rs62197322	A	G	chr2	232055000	232060000	chr2	231970000	231975000	ENSG00000173692.8	1.75196e-05	PSMD1
Heart_Atrial_Appendage	HTR2B	chr2	232058493	rs2368563	A	G	chr2	232055000	232060000	chr2	231970000	231975000	ENSG00000135914.5	3.87732e-09	HTR2B
		chr2	232060843	rs60664562	T	A	chr2	232055000	232060000	chr2	231970000	231975000	ENSG00000135914.5	6.28667e-09	HTR2B
		chr2	232061520	rs62197322	A	G	chr2	232055000	232060000	chr2	231970000	231975000	ENSG00000135914.5	2.95665e-09	HTR2B
Brain_Cerebellar_Hemisphere	IL18R1	chr2	103054449	rs2058660	G	A	chr2	103050000	103060000	chr2	102970000	102980000	ENSG00000115604.6	1.47214e-05	IL18R1
Esophagus_Mucosa	SYN2	chr3	12313846	rs6807915	T	C	chr3	12315000	12320000	chr3	12225000	12230000	ENSG00000157152.12	2.48828e-07	SYN2
Spleen	SKAP2	chr7	26726454	rs212854	C	G	chr7	26720000	26725000	chr7	26890000	26895000	ENSG00000005020.8	1.33293e-05	SKAP2
Thyroid	ASAP1	chr8	131296767	rs4733781	A	C	chr8	131290000	131300000	chr8	131340000	131350000	ENSG00000153317.10	7.03282e-05	ASAP1
Artery_Tibial	LYN	chr8	56797257	rs28595219	C	T	chr8	56790000	56800000	chr8	56880000	56890000	ENSG00000254087.3	2.45263e-14	LYN
Artery_Aorta	FAM107B	chr10	14689835	rs10906729	C	T	chr10	14690000	14700000	chr10	14640000	14650000	ENSG00000065809.9	3.25027e-10	FAM107B
Lung	LRRK2	chr12	40552417	rs1873613	T	C	chr12	40545000	40550000	chr12	40615000	40620000	ENSG00000188906.9	3.2944e-05	LRRK2
Esophagus_Mucosa	ANKFN1	chr17	54563063	rs9901739	C	A	chr17	54550000	54560000	chr17	54200000	54210000	ENSG00000153930.6	2.57646e-08	ANKFN1
