# Supplementary material for: The order of macrophage 4D genome coordinates gene transcription during differentiation and infection
Source: Research Square preprint supplement (doi:10.21203/rs.3.rs-881693/v1), 2021-10-29
Supplement: Supplementary file 8 [file 767bf98608562842b73a32e7.xlsx]

## Sheet: 96 Barcoded half linkers
Table S8
Table S8.1. Sequence of 96 barcoded half linkers
MseI-linker-00-F	TAGTCGGAGTGCGGACG
MseI-linker-00-R	CTAGCGTCCGCACTCCGAC
MseI-linker-01-F	TAGTCGGATACCGCACG
MseI-linker-01-R	CTAGCGTGCGGTATCCGAC
MseI-linker-02-F	TAGTCGGAGAATATCAG
MseI-linker-02-R	CTAGCTGATATTCTCCGAC
MseI-linker-03-F	TAGTCGGACCTTGAATG
MseI-linker-03-R	CTAGCATTCAAGGTCCGAC
MseI-linker-04-F	TAGTCGGATGTAGCTAG
MseI-linker-04-R	CTAGCTAGCTACATCCGAC
MseI-linker-05-F	TAGTCGGATAGCAGATG
MseI-linker-05-R	CTAGCATCTGCTATCCGAC
MseI-linker-06-F	TAGTCGGATCTAACGGG
MseI-linker-06-R	CTAGCCCGTTAGATCCGAC
MseI-linker-07-F	TAGTCGGAAGAGACAGG
MseI-linker-07-R	CTAGCCTGTCTCTTCCGAC
MseI-linker-08-F	TAGTCGGAACCTGACAG
MseI-linker-08-R	CTAGCTGTCAGGTTCCGAC
MseI-linker-09-F	TAGTCGGACATCGGTTG
MseI-linker-09-R	CTAGCAACCGATGTCCGAC
MseI-linker-10-F	TAGTCGGAATGGAAGAG
MseI-linker-10-R	CTAGCTCTTCCATTCCGAC
MseI-linker-11-F	TAGTCGGAGCACATTGG
MseI-linker-11-R	CTAGCCAATGTGCTCCGAC
MseI-linker-12-F	TAGTCGGATGGTGGTGG
MseI-linker-12-R	CTAGCCACCACCATCCGAC
MseI-linker-13-F	TAGTCGGATCGAGGCCG
MseI-linker-13-R	CTAGCGGCCTCGATCCGAC
MseI-linker-14-F	TAGTCGGAATTGCGAAG
MseI-linker-14-R	CTAGCTTCGCAATTCCGAC
MseI-linker-15-F	TAGTCGGAGCTTCCACG
MseI-linker-15-R	CTAGCGTGGAAGCTCCGAC
MseI-linker-16-F	TAGTCGGAGCTATAGAG
MseI-linker-16-R	CTAGCTCTATAGCTCCGAC
MseI-linker-17-F	TAGTCGGACCAGTAGCG
MseI-linker-17-R	CTAGCGCTACTGGTCCGAC
MseI-linker-18-F	TAGTCGGATGATTCAAG
MseI-linker-18-R	CTAGCTTGAATCATCCGAC
MseI-linker-19-F	TAGTCGGATGTTATATG
MseI-linker-19-R	CTAGCATATAACATCCGAC
MseI-linker-20-F	TAGTCGGAATCGTTCAG
MseI-linker-20-R	CTAGCTGAACGATTCCGAC
MseI-linker-21-F	TAGTCGGATCGCCTGCG
MseI-linker-21-R	CTAGCGCAGGCGATCCGAC
MseI-linker-22-F	TAGTCGGAAATCTGAGG
MseI-linker-22-R	CTAGCCTCAGATTTCCGAC
MseI-linker-23-F	TAGTCGGATAATCATTG
MseI-linker-23-R	CTAGCAATGATTATCCGAC
MseI-linker-24-F	TAGTCGGACGACTTCGG
MseI-linker-24-R	CTAGCCGAAGTCGTCCGAC
MseI-linker-25-F	TAGTCGGACCAATCCAG
MseI-linker-25-R	CTAGCTGGATTGGTCCGAC
MseI-linker-26-F	TAGTCGGAGTGGCATTG
MseI-linker-26-R	CTAGCAATGCCACTCCGAC
MseI-linker-27-F	TAGTCGGACGGTAATCG
MseI-linker-27-R	CTAGCGATTACCGTCCGAC
MseI-linker-28-F	TAGTCGGATCCTCGCGG
MseI-linker-28-R	CTAGCCGCGAGGATCCGAC
MseI-linker-29-F	TAGTCGGAACTATTACG
MseI-linker-29-R	CTAGCGTAATAGTTCCGAC
MseI-linker-30-F	TAGTCGGATATGCTTCG
MseI-linker-30-R	CTAGCGAAGCATATCCGAC
MseI-linker-31-F	TAGTCGGAGTTCTTCTG
MseI-linker-31-R	CTAGCAGAAGAACTCCGAC
MseI-linker-32-F	TAGTCGGAAAGATTGAG
MseI-linker-32-R	CTAGCTCAATCTTTCCGAC
MseI-linker-33-F	TAGTCGGACTCCACAGG
MseI-linker-33-R	CTAGCCTGTGGAGTCCGAC
MseI-linker-34-F	TAGTCGGAAATTAGTAG
MseI-linker-34-R	CTAGCTACTAATTTCCGAC
MseI-linker-35-F	TAGTCGGAACTGTCCTG
MseI-linker-35-R	CTAGCAGGACAGTTCCGAC
MseI-linker-36-F	TAGTCGGACGAAGGATG
MseI-linker-36-R	CTAGCATCCTTCGTCCGAC
MseI-linker-37-F	TAGTCGGATTAGGACTG
MseI-linker-37-R	CTAGCAGTCCTAATCCGAC
MseI-linker-38-F	TAGTCGGAAACCGTCGG
MseI-linker-38-R	CTAGCCGACGGTTTCCGAC
MseI-linker-39-F	TAGTCGGAGATAACCTG
MseI-linker-39-R	CTAGCAGGTTATCTCCGAC
MseI-linker-40-F	TAGTCGGACAGCTATAG
MseI-linker-40-R	CTAGCTATAGCTGTCCGAC
MseI-linker-41-F	TAGTCGGACTTCCTTAG
MseI-linker-41-R	CTAGCTAAGGAAGTCCGAC
MseI-linker-42-F	TAGTCGGAATTAATGTG
MseI-linker-42-R	CTAGCACATTAATTCCGAC
MseI-linker-43-F	TAGTCGGAGGCAAGTTG
MseI-linker-43-R	CTAGCAACTTGCCTCCGAC
MseI-linker-44-F	TAGTCGGAGCCTGTGTG
MseI-linker-44-R	CTAGCACACAGGCTCCGAC
MseI-linker-45-F	TAGTCGGAACGCCAATG
MseI-linker-45-R	CTAGCATTGGCGTTCCGAC
MseI-linker-46-F	TAGTCGGATCGATAAGG
MseI-linker-46-R	CTAGCCTTATCGATCCGAC
MseI-linker-47-F	TAGTCGGACAAGTCTGG
MseI-linker-47-R	CTAGCCAGACTTGTCCGAC
MseI-linker-48-F	TAGTCGGACGGAGAGGG
MseI-linker-48-R	CTAGCCCTCTCCGTCCGAC
MseI-linker-49-F	TAGTCGGACCGGCGTCG
MseI-linker-49-R	CTAGCGACGCCGGTCCGAC
MseI-linker-50-F	TAGTCGGACTTATGCCG
MseI-linker-50-R	CTAGCGGCATAAGTCCGAC
MseI-linker-51-F	TAGTCGGATGACTAGTG
MseI-linker-51-R	CTAGCACTAGTCATCCGAC
MseI-linker-52-F	TAGTCGGAAACGCGGTG
MseI-linker-52-R	CTAGCACCGCGTTTCCGAC
MseI-linker-53-F	TAGTCGGAGTAAGTGAG
MseI-linker-53-R	CTAGCTCACTTACTCCGAC
MseI-linker-54-F	TAGTCGGATTCTTGGCG
MseI-linker-54-R	CTAGCGCCAAGAATCCGAC
MseI-linker-55-F	TAGTCGGATGTTGACCG
MseI-linker-55-R	CTAGCGGTCAACATCCGAC
MseI-linker-56-F	TAGTCGGACTATGATGG
MseI-linker-56-R	CTAGCCATCATAGTCCGAC
MseI-linker-57-F	TAGTCGGAAAGAACTCG
MseI-linker-57-R	CTAGCGAGTTCTTTCCGAC
MseI-linker-58-F	TAGTCGGAAGCGGTGCG
MseI-linker-58-R	CTAGCGCACCGCTTCCGAC
MseI-linker-59-F	TAGTCGGACGTTCCGGG
MseI-linker-59-R	CTAGCCCGGAACGTCCGAC
MseI-linker-60-F	TAGTCGGAGCAGCCGGG
MseI-linker-60-R	CTAGCCCGGCTGCTCCGAC
MseI-linker-61-F	TAGTCGGAGATGTAATG
MseI-linker-61-R	CTAGCATTACATCTCCGAC
MseI-linker-62-F	TAGTCGGAGACACTAAG
MseI-linker-62-R	CTAGCTTAGTGTCTCCGAC
MseI-linker-63-F	TAGTCGGAGGATTGTCG
MseI-linker-63-R	CTAGCGACAATCCTCCGAC
MseI-linker-64-F	TAGTCGGAGGCCACCAG
MseI-linker-64-R	CTAGCTGGTGGCCTCCGAC
MseI-linker-65-F	TAGTCGGATCTCAATAG
MseI-linker-65-R	CTAGCTATTGAGATCCGAC
MseI-linker-66-F	TAGTCGGATTAACTCCG
MseI-linker-66-R	CTAGCGGAGTTAATCCGAC
MseI-linker-67-F	TAGTCGGAGTGTACCGG
MseI-linker-67-R	CTAGCCGGTACACTCCGAC
MseI-linker-68-F	TAGTCGGAATAAGAACG
MseI-linker-68-R	CTAGCGTTCTTATTCCGAC
MseI-linker-69-F	TAGTCGGAGATCAGGCG
MseI-linker-69-R	CTAGCGCCTGATCTCCGAC
MseI-linker-70-F	TAGTCGGACGGTTGCTG
MseI-linker-70-R	CTAGCAGCAACCGTCCGAC
MseI-linker-71-F	TAGTCGGAGCCGAACTG
MseI-linker-71-R	CTAGCAGTTCGGCTCCGAC
MseI-linker-72-F	TAGTCGGACGTCTCATG
MseI-linker-72-R	CTAGCATGAGACGTCCGAC
MseI-linker-73-F	TAGTCGGACTACAGTCG
MseI-linker-73-R	CTAGCGACTGTAGTCCGAC
MseI-linker-74-F	TAGTCGGAAGGTCTCCG
MseI-linker-74-R	CTAGCGGAGACCTTCCGAC
MseI-linker-75-F	TAGTCGGAACCAGCTTG
MseI-linker-75-R	CTAGCAAGCTGGTTCCGAC
MseI-linker-76-F	TAGTCGGATTGAGCGTG
MseI-linker-76-R	CTAGCACGCTCAATCCGAC
MseI-linker-77-F	TAGTCGGATCACGGAGG
MseI-linker-77-R	CTAGCCTCCGTGATCCGAC
MseI-linker-78-F	TAGTCGGAAAGGAGCGG
MseI-linker-78-R	CTAGCCGCTCCTTTCCGAC
MseI-linker-79-F	TAGTCGGATGCACAACG
MseI-linker-79-R	CTAGCGTTGTGCATCCGAC
MseI-linker-80-F	TAGTCGGATCAGTGTTG
MseI-linker-80-R	CTAGCAACACTGATCCGAC
MseI-linker-81-F	TAGTCGGAACTGGATCG
MseI-linker-81-R	CTAGCGATCCAGTTCCGAC
MseI-linker-82-F	TAGTCGGACGCATCTCG
MseI-linker-82-R	CTAGCGAGATGCGTCCGAC
MseI-linker-83-F	TAGTCGGAGGTCGAAGG
MseI-linker-83-R	CTAGCCTTCGACCTCCGAC
MseI-linker-84-F	TAGTCGGACGCGCTAGG
MseI-linker-84-R	CTAGCCTAGCGCGTCCGAC
MseI-linker-85-F	TAGTCGGACACGGCCAG
MseI-linker-85-R	CTAGCTGGCCGTGTCCGAC
MseI-linker-86-F	TAGTCGGATAATACGCG
MseI-linker-86-R	CTAGCGCGTATTATCCGAC
MseI-linker-87-F	TAGTCGGAGCGAGCAAG
MseI-linker-87-R	CTAGCTTGCTCGCTCCGAC
MseI-linker-88-F	TAGTCGGAAGGTACGTG
MseI-linker-88-R	CTAGCACGTACCTTCCGAC
MseI-linker-89-F	TAGTCGGACTGTGTAAG
MseI-linker-89-R	CTAGCTTACACAGTCCGAC
MseI-linker-90-F	TAGTCGGATTCCGAGGG
MseI-linker-90-R	CTAGCCCTCGGAATCCGAC
MseI-linker-91-F	TAGTCGGAGGACCGCTG
MseI-linker-91-R	CTAGCAGCGGTCCTCCGAC
MseI-linker-92-F	TAGTCGGAGAGTCCTAG
MseI-linker-92-R	CTAGCTAGGACTCTCCGAC
MseI-linker-93-F	TAGTCGGAGGCCTTACG
MseI-linker-93-R	CTAGCGTAAGGCCTCCGAC
MseI-linker-94-F	TAGTCGGATTGGCCAGG
MseI-linker-94-R	CTAGCCTGGCCAATCCGAC
MseI-linker-95-F	TAGTCGGAAGGCCGGAG
MseI-linker-95-R	CTAGCTCCGGCCTTCCGAC

## Sheet: BGI sequenceing adapter
Table S8.2. Sequence of BGI sequenceing adapter
BGI-PE-1-F	5'>GAACGACATGGCTACGATCCGACTTNN<3'
BGI-PE-1-R	5'>AAGTCGGATCGTAGCCATGTCGTTC<3'
BGI-PE-2-F	5'>AAGTCGGAGGCCAAGCGGTCTTAGG<3'
BGI-PE-2-R	5'>CCTAAGACCGCTTGGCCTCCGACTTNN<3'

## Sheet: 14Barcoded amplification primer
Table S8.3. Sequence of barcoded amplification primers
BGI-univer-F	5'>p-GAACGACATGGCTACGATCCGACTT<3'
BGI-index1	5'>TGTGAGCCAAGGAGTTGATCGGACCTATTGTCTTCCTAAGACCGCTTGGCCTCCGACT<3'
BGI-index2	5'>TGTGAGCCAAGGAGTTGGATTCCGTCCTTGTCTTCCTAAGACCGCTTGGCCTCCGACT<3'
BGI-index3	5'>TGTGAGCCAAGGAGTTGCGGCAGTAAGTTGTCTTCCTAAGACCGCTTGGCCTCCGACT<3'
BGI-index4	5'>TGTGAGCCAAGGAGTTGTCAATTAGGTTTGTCTTCCTAAGACCGCTTGGCCTCCGACT<3'
BGI-index5	5'>TGTGAGCCAAGGAGTTGCGGATACGAATTGTCTTCCTAAGACCGCTTGGCCTCCGACT<3'
BGI-index6	5'>TGTGAGCCAAGGAGTTGGCTCGTTACCTTGTCTTCCTAAGACCGCTTGGCCTCCGACT<3'
BGI-index7	5'>TGTGAGCCAAGGAGTTGTTATACGTTGTTGTCTTCCTAAGACCGCTTGGCCTCCGACT<3
BGI-index8	5'>TGTGAGCCAAGGAGTTGAACGCGACGTTTGTCTTCCTAAGACCGCTTGGCCTCCGACT<3'
BGI-index9	5'>TGTGAGCCAAGGAGTTGGCTAGCAGAATTGTCTTCCTAAGACCGCTTGGCCTCCGACT<3'
BGI-index10	5'>TGTGAGCCAAGGAGTTGCTATCTTCCTTTGTCTTCCTAAGACCGCTTGGCCTCCGACT<3'
BGI-index11	5'>TGTGAGCCAAGGAGTTGTCCGTTGAATTTGTCTTCCTAAGACCGCTTGGCCTCCGACT<3'
BGI-index12	5'>TGTGAGCCAAGGAGTTGCAGTACAGTTTTGTCTTCCTAAGACCGCTTGGCCTCCGACT<3'
BGI-index13	5'>TGTGAGCCAAGGAGTTGATTGAGGTACTTGTCTTCCTAAGACCGCTTGGCCTCCGACT<3'
BGI-index14	5'>TGTGAGCCAAGGAGTTGATTAGAAGTCTTGTCTTCCTAAGACCGCTTGGCCTCCGACT<3'
